# Supplementary material
Source: publisher site journal article supplement (https://www.dovepress.com/article/598622)
Supplement: Supplementary file 1 [file 598622_Paper_CovLib2_SI_rev2.pdf]

# Supplementary Material

## **Characterization of the Second-Generation Covalent Fragment Library (CovLib Gen2): Thiol Reactivity Profiling and p53-Y220C Rescue**

Martin Schwer<sup>1</sup>, Sven R. Aldea<sup>1</sup>, Marc U. Engelhardt<sup>1</sup>, Jason Stahlecker<sup>1</sup>, Janosch Rheinganz<sup>1</sup>, Aaron Langkamp<sup>1</sup>, and Frank M. Boeckler<sup>1,2</sup>

<sup>1</sup>Department of Pharmacy and Biochemistry, Laboratory for Molecular Design & Pharmaceutical Biophysics, Eberhard Karls Universität Tübingen, Institute of Pharmaceutical Sciences, 72076 Tübingen, Germany

<sup>2</sup>Interfaculty Institute for Biomedical Informatics (IBMI), Eberhard Karls Universität Tübingen, 72076 Tübingen, Germany

Correspondence: Frank M. Boeckler

Department of Pharmacy and Biochemistry,

Laboratory for Molecular Design & Pharmaceutical Biophysics,

Eberhard Karls Universität Tübingen ,

Institute of Pharmaceutical Sciences,

72076 Tübingen,

Germany

Tel +49 7071 29 74567

Email [frank.boeckler@uni-tuebingen.de](mailto:frank.boeckler@uni-tuebingen.de)

## Content

|     |                                               |    |
|-----|-----------------------------------------------|----|
| 1   | Purity Data.....                              | 3  |
| 1.1 | HPLC Method.....                              | 3  |
| 1.2 | Nuclear magnetic resonance (NMR) Method ..... | 3  |
| 1.3 | Results of the Purity Determination.....      | 4  |
| 1.4 | HPLC traces and NMR spectra.....              | 5  |
| 2   | Calculated Molecular Properties.....          | 46 |
| 3   | Turbidimetric Solubility Assessment .....     | 49 |
| 3.1 | Spectra.....                                  | 49 |
| 4   | DTNB Assay .....                              | 75 |
| 4.1 | Fit Results.....                              | 75 |
| 4.2 | Plots from the DTNB Assay .....               | 77 |
| 5   | GSH Assay .....                               | 84 |
| 5.1 | Plots from the GSH Assay.....                 | 84 |
| 6   | Protein Sequences .....                       | 91 |
| 7   | DSF measurements.....                         | 92 |
| 7.1 | Results of the primary screening.....         | 92 |
| 7.2 | Time Dependent DSF Measurements .....         | 94 |
| 7.3 | Concentration Dependent DSF Measurements..... | 95 |

## 1 Purity Data

### 1.1 HPLC Method

Purity was confirmed by high-performance liquid chromatography (HPLC) on an Ultimate 3000 HPLC- System with UV Detection (Thermo Fisher Scientific, Dreieich, Germany). The system was equipped with a ReproSil-XR 120 C18, 5  $\mu\text{m}$ , 150 mm x 4.6 mm column (Dr. Maisch GmbH, Ammerbuch-Entringen, Germany) with column temperature set to 25  $^{\circ}\text{C}$ . Mobile phase A was 10 mM phosphate buffer pH 2.3 and mobile phase B was MeOH. The flow rate was set to 0.5 mL per min with the following gradient: 0– 9 min: 10-85% B, 9–13 min: 85% B, 13–14 min: 85-10% B, 14– 18 min: 10% B. For analysis, the fragments were dissolved in ACN or MeOH. 5  $\mu\text{L}$  of the compound solution was injected on the column. The purity of the compounds was then calculated as the relative AUC of the main peak of the chromatogram at 218, 254, 280, or 350 nm depending on the absorbance properties of the individual fragment. Retention times, calculated purities and detection waves used for the evaluation are summarized in Table S 1.1.

### 1.2 Nuclear magnetic resonance (NMR) Method

Compounds were dissolved in DMSO- $d_6$  or  $\text{CDCl}_3$  and  $^1\text{H}$  spectra were acquired on a Bruker Avance III HD 400 MHz system. NMR spectra are reported as chemical shifts ( $\delta$ ) in parts per million (ppm) in relation to tetramethylsilane (TMS) and were calibrated using the residual peak of the used solvent. Coupling constants (J) are reported in units of hertz (Hz). The following abbreviations are used to describe multiplicities: s (singlet), d (doublet), q (quartet), and m (multiplet).

### 1.3 Results of the Purity Determination

Table S 1.1: Results of the purity determination. Compounds not meeting the purity criteria of  $\geq 90\%$  are colored in red

| Compound | Retentiontime [min] | Detection wavelength [nm] | Relative Purity [%] |
|----------|---------------------|---------------------------|---------------------|
| AA001    | 7.433               | 254                       | 96.04               |
| AA002    | 7.107               | 218                       | 90.99               |
| AA003    | 5.007               | 254                       | 99.42               |
| AA004    | 12.025              | 254                       | 100.00              |
| AA005    | 9.832               | 254                       | 100.00              |
| AA006    | 8.477               | 254                       | 100.00              |
| AA007    | 10.750              | 254                       | 100.00              |
| AA008    | 10.340              | 254                       | 100.00              |
| CA006    | 9.917               | 254                       | 100.00              |
| CA007    | 11.517              | 254                       | 100.00              |
| CA008    | 9.113               | 254                       | 97.26               |
| EO004    | NMR <sup>a</sup>    | NMR <sup>a</sup>          | NMR <sup>a</sup>    |
| EO005    | 10.398              | 218                       | 91.18               |
| EO006    | NMR <sup>a</sup>    | NMR <sup>a</sup>          | NMR <sup>a</sup>    |
| EO007    | 9.137               | 218                       | 70.86               |
| EO008    | 10.315              | 218                       | 95.58               |
| EO009    | NMR <sup>a</sup>    | NMR <sup>a</sup>          | NMR <sup>a</sup>    |
| EO010    | 10.698              | 254                       | 91.32               |
| SN013    | 8.915               | 218                       | 98.31               |
| SN014    | 9.855               | 254                       | 100.00              |
| SN015    | 7.265               | 254                       | 99.55               |
| SN016    | 11.332              | 254                       | 100.00              |
| SN017    | 11.043              | 254                       | 94.42               |
| SN018    | 4.235               | 254                       | 100                 |
| SN019    | 9.717               | 254                       | 91.92               |
| SN020    | 6.042               | 254                       | 99.22               |
| SN021    | 10.805              | 254                       | 98.65               |
| SN022    | 9.660               | 254                       | 100.00              |
| SN023    | 8.047               | 254                       | 100.00              |
| SN024    | 5.405               | 254                       | 96.44               |
| SN025    | 9.388               | 254                       | 100.00              |
| SN026    | 8.553               | 254                       | 100.00              |
| SN027    | 8.990               | 254                       | 99.05               |
| SN028    | 4.630               | 218                       | 96.20               |
| SN029    | 11.473              | 254                       | 100.00              |
| SN030    | 9.268               | 254                       | 100.00              |
| SN031    | 13.423              | 254                       | 97.13               |
| SN032    | 12.34               | 254                       | 98.75               |
| SN033    | 11.795              | 254                       | 97.47               |
| SN034    | 9.972               | 254                       | 84.55               |
| SN035    | 10.510              | 254                       | 100.00              |
| SN036    | 12.300              | 254                       | 100.00              |
| SN037    | 8.968               | 254                       | 98.56               |
| SN038    | 8.078               | 254                       | 99.14               |
| SN039    | 11.155              | 254                       | 96.57               |
| SN040    | 11.907              | 254                       | 94.65               |
| SN041    | 11.795              | 254                       | 99.03               |
| SN042    | 9.088               | 254                       | 98.36               |
| SN043    | 5.857               | 254                       | 100.00              |
| SN044    | 9.723               | 254                       | 97.08               |
| SN045    | 8.817               | 254                       | 100.00              |
| SN046    | 9.36                | 254                       | 100                 |
| SN047    | 7.032               | 254                       | 100.00              |
| SN048    | 11.922              | 254                       | 92.24               |
| SN049    | 12.258              | 254                       | 96.03               |
| SN050    | 9.225               | 254                       | 99.02               |
| SN051    | 6.452               | 280                       | 96.64               |
| SN052    | 9.897               | 254                       | 100.00              |
| SN053    | 9.980               | 218                       | 98.54               |
| SN054    | 10.025              | 254                       | 98.96               |
| SN055    | 11.305              | 254                       | 99.06               |
| SN056    | 8.4                 | 254                       | 97.6                |
| SN057    | 11.245              | 254                       | 96.87               |
| SN058    | 9.182               | 254                       | 99.35               |
| SN059    | 10.198              | 254                       | 97.72               |
| SN060    | 11.300              | 254                       | 100.00              |
| SN061    | 9.762               | 254                       | 97.47               |
| SN062    | 10.463              | 254                       | 99.42               |
| SN063    | 8.228               | 254                       | 98.90               |
| SN064    | 6.020               | 254                       | 99.66               |
| SN065    | 10.052              | 254                       | 95.75               |
| SN066    | 8.598               | 254                       | 58.78               |
| SN067    | 10.565              | 350                       | 100.00              |
| SN068    | 9.913               | 254                       | 95.65               |
| SN069    | 11.500              | 254                       | 95.62               |
| SN070    | 11.503              | 254                       | 100.00              |
| SN071    | 9.087               | 254                       | 97.26               |
| SN072    | 9.473               | 350                       | 100.00              |
| VS005    | 11.383              | 254                       | 100                 |
| VS006    | NMR <sup>a</sup>    | NMR <sup>a</sup>          | NMR <sup>a</sup>    |
| VS007    | 7.433               | 254                       | 96.04               |

<sup>a</sup> The compound was not suitable for HPLC-UV analysis. <sup>1</sup>H-NMR was performed instead. The red color indicates that the determined purity is below 90%.

## 1.4 HPLC traces and NMR spectra

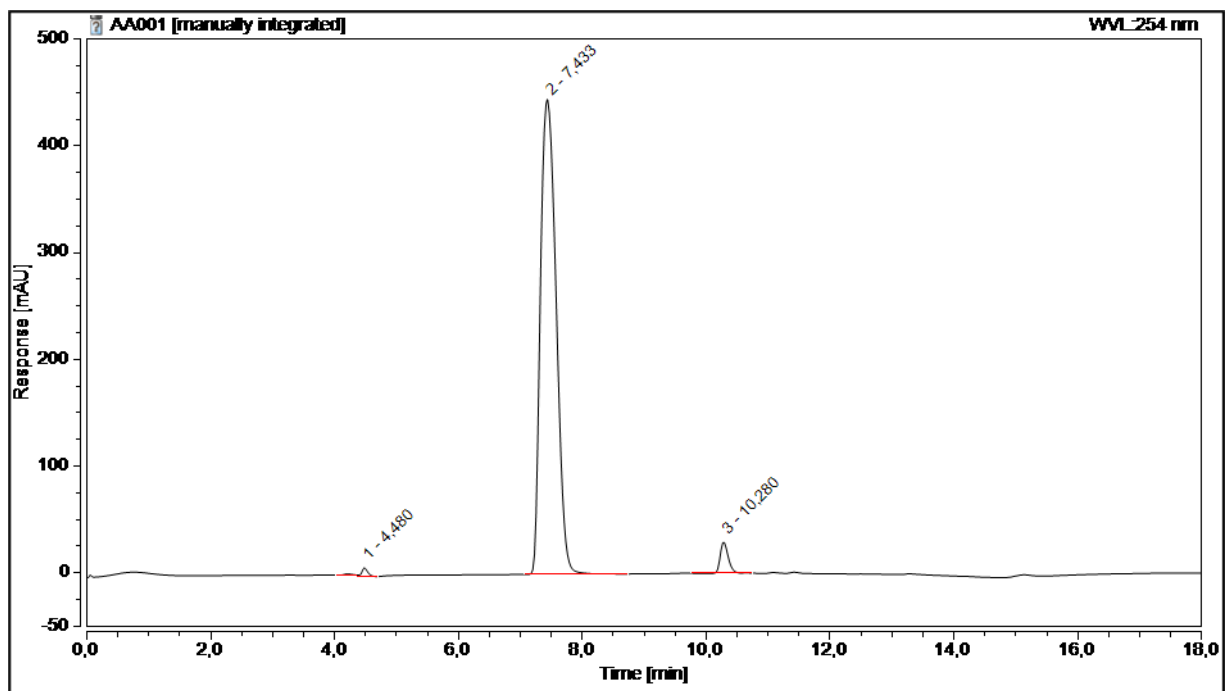

Figure S 1.1: HPLC chromatogram of AA001.

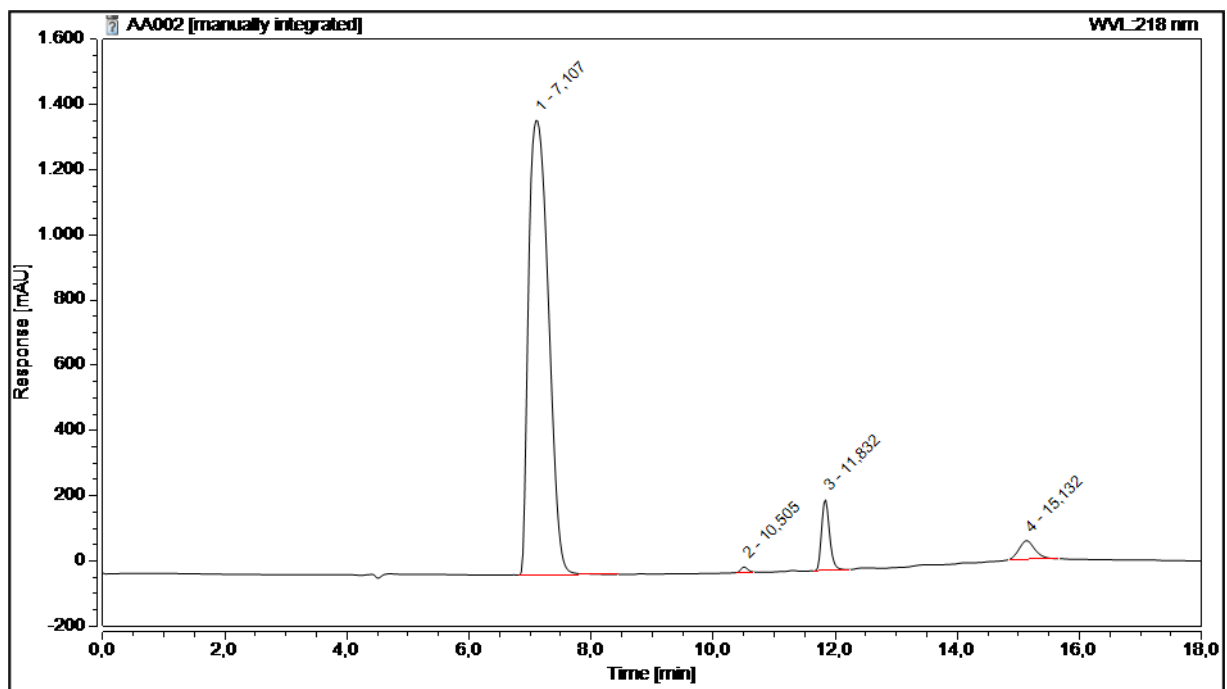

Figure S 1.2: HPLC chromatogram of AA002.

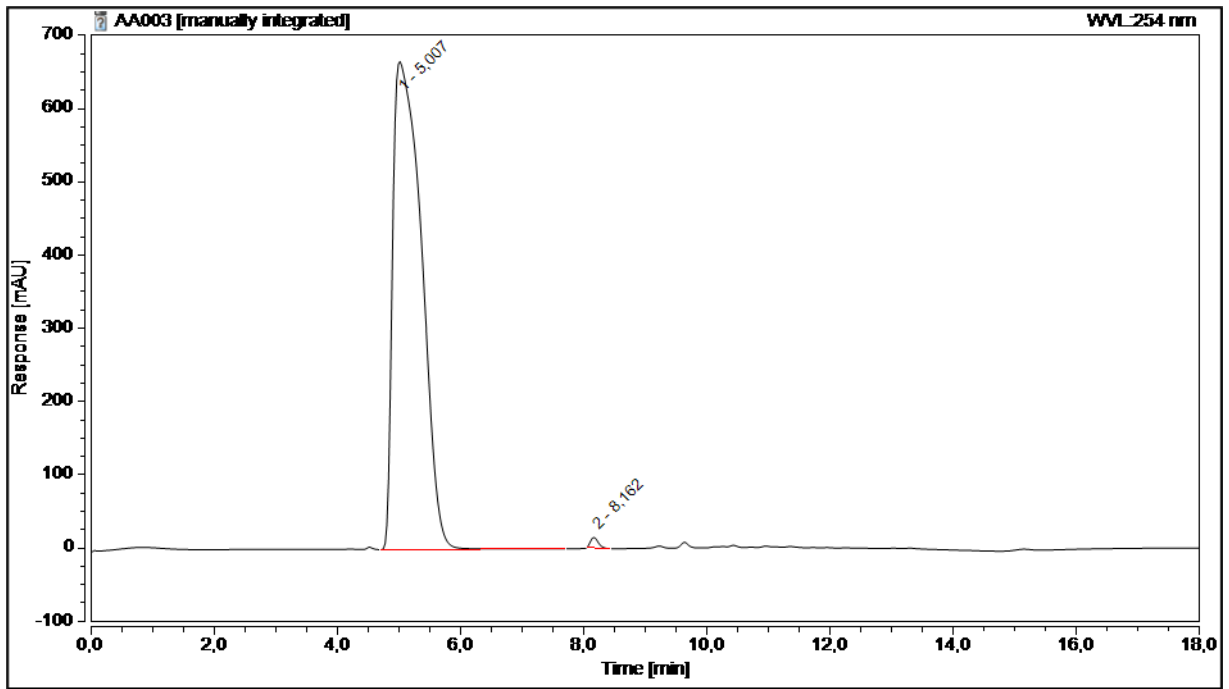

Figure S 1.3: HPLC chromatogram of AA003.

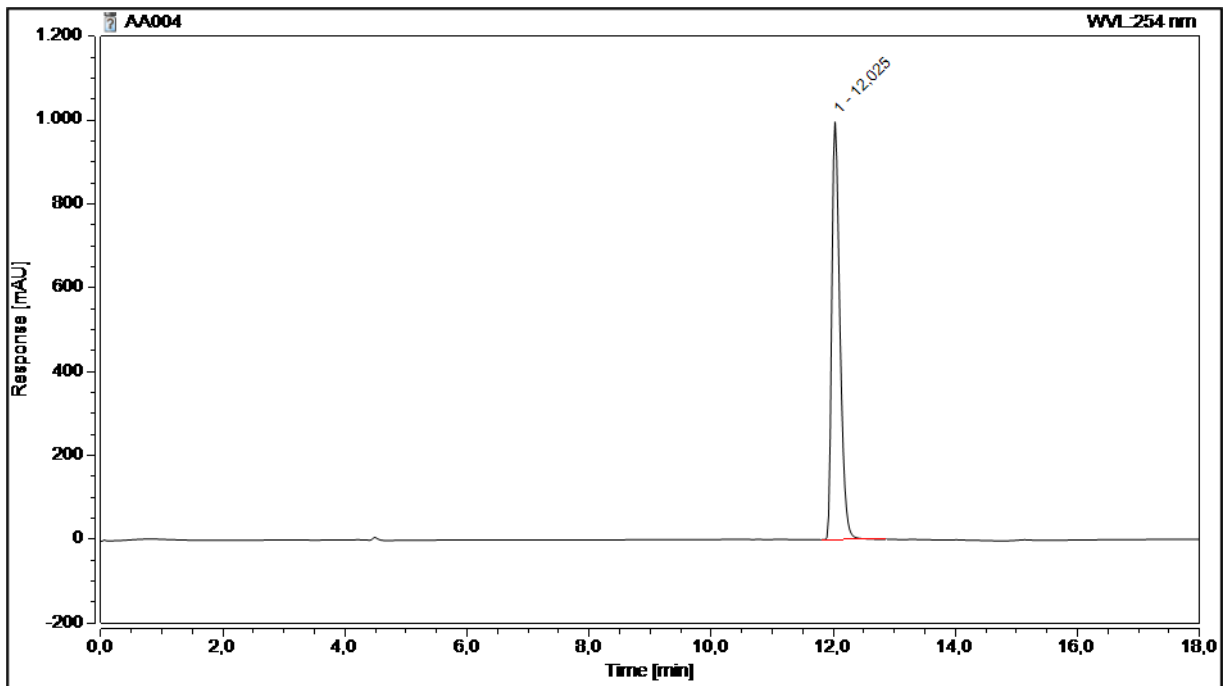

Figure S 1.4: HPLC chromatogram of AA004.

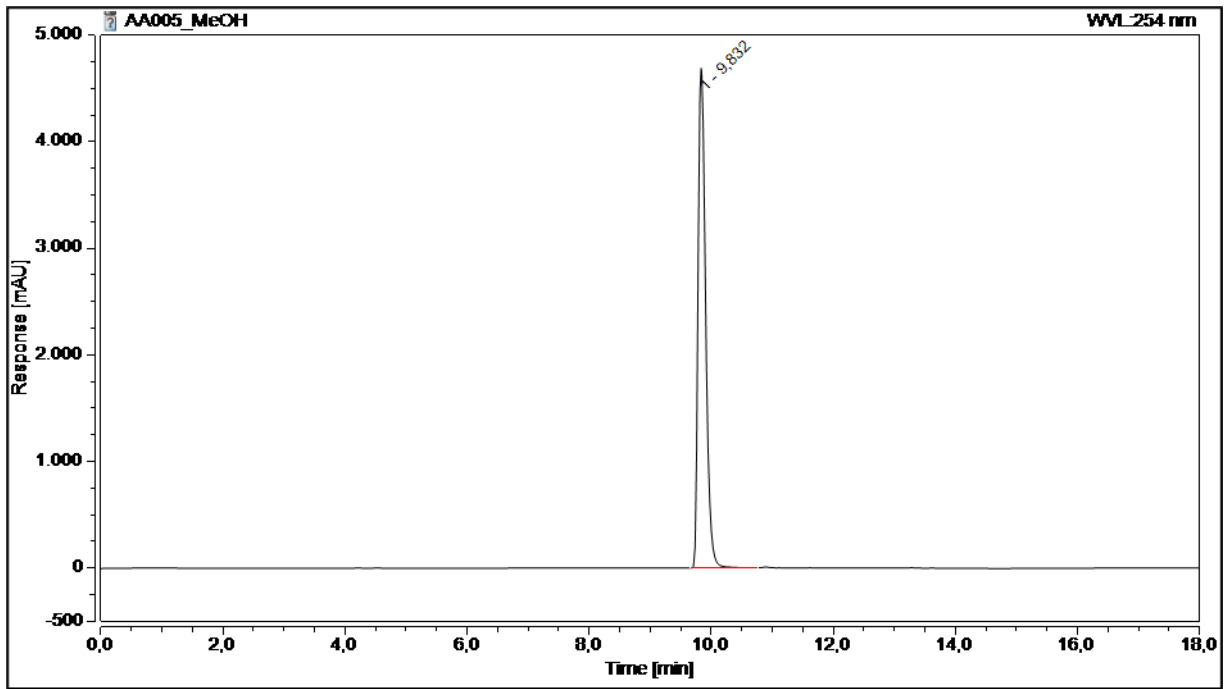

Figure S 1.5: HPLC chromatogram of AA005.

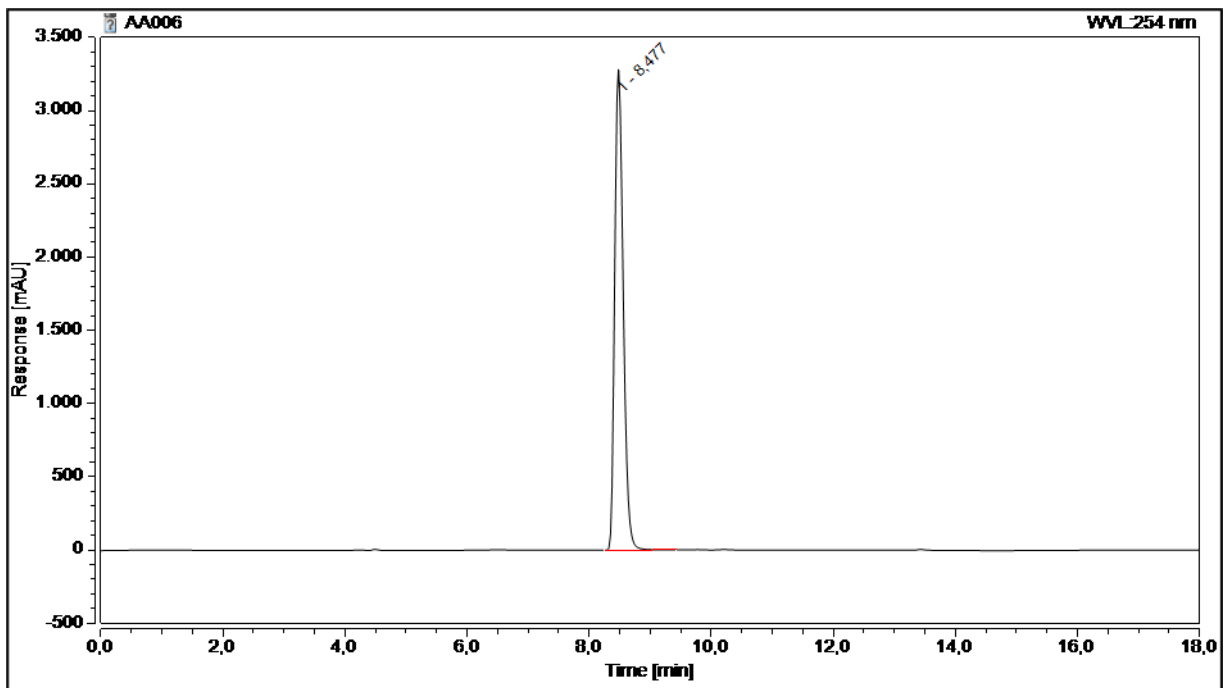

Figure S 1.6: HPLC chromatogram of AA006.

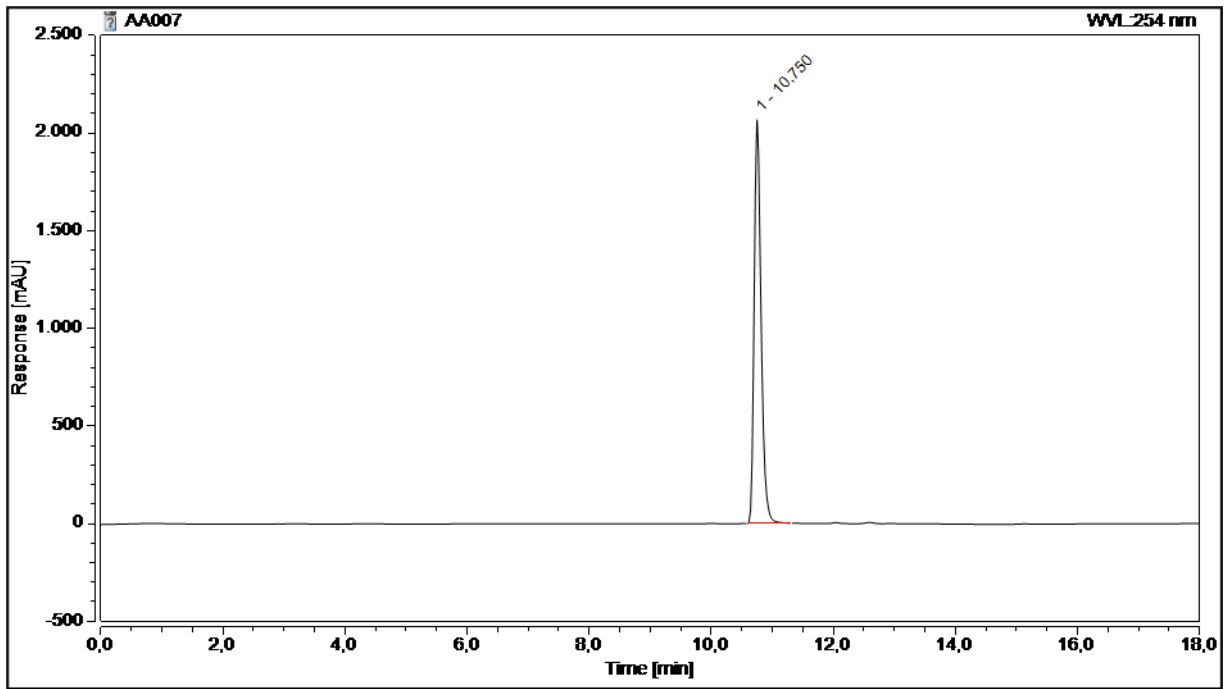

Figure S 1.7: HPLC chromatogram of AA007.

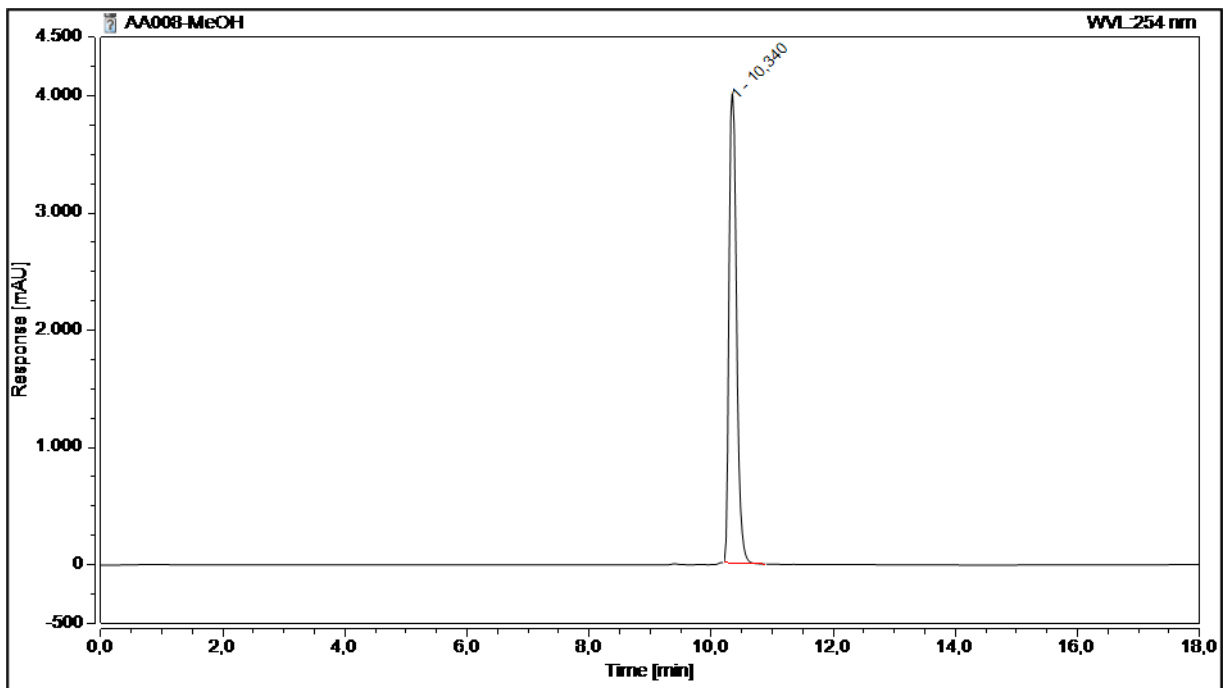

Figure S 1.8: HPLC chromatogram of AA008.

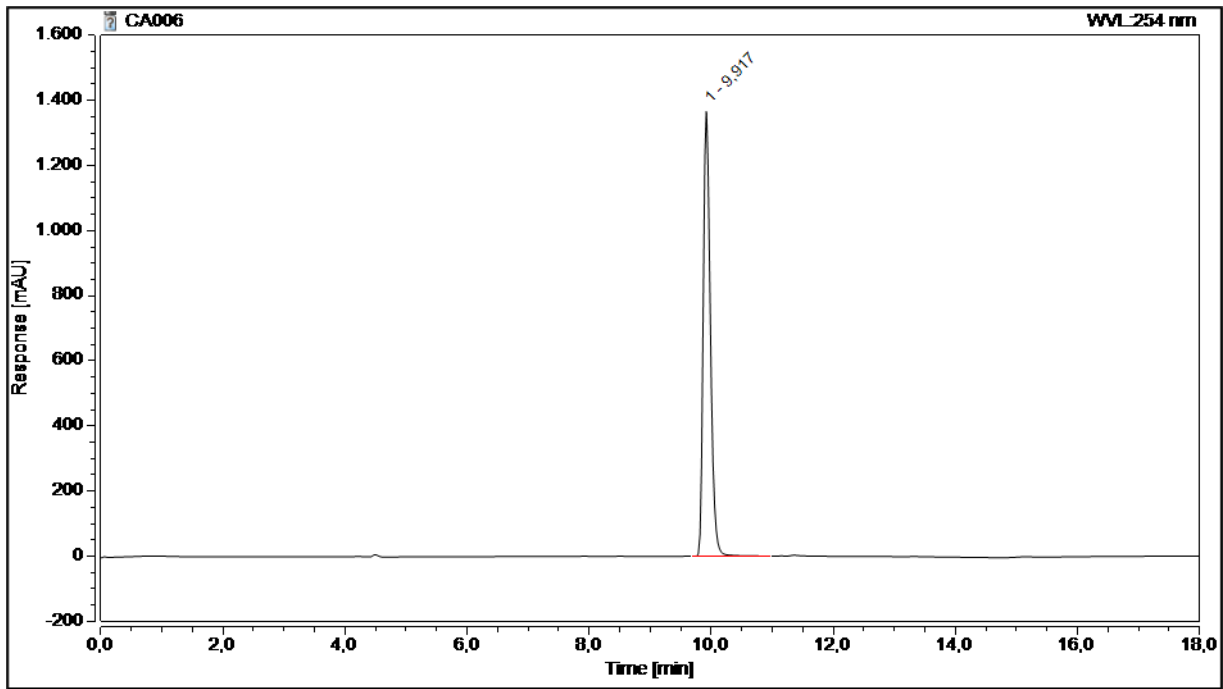

Figure S 1.9: HPLC chromatogram of CA006.

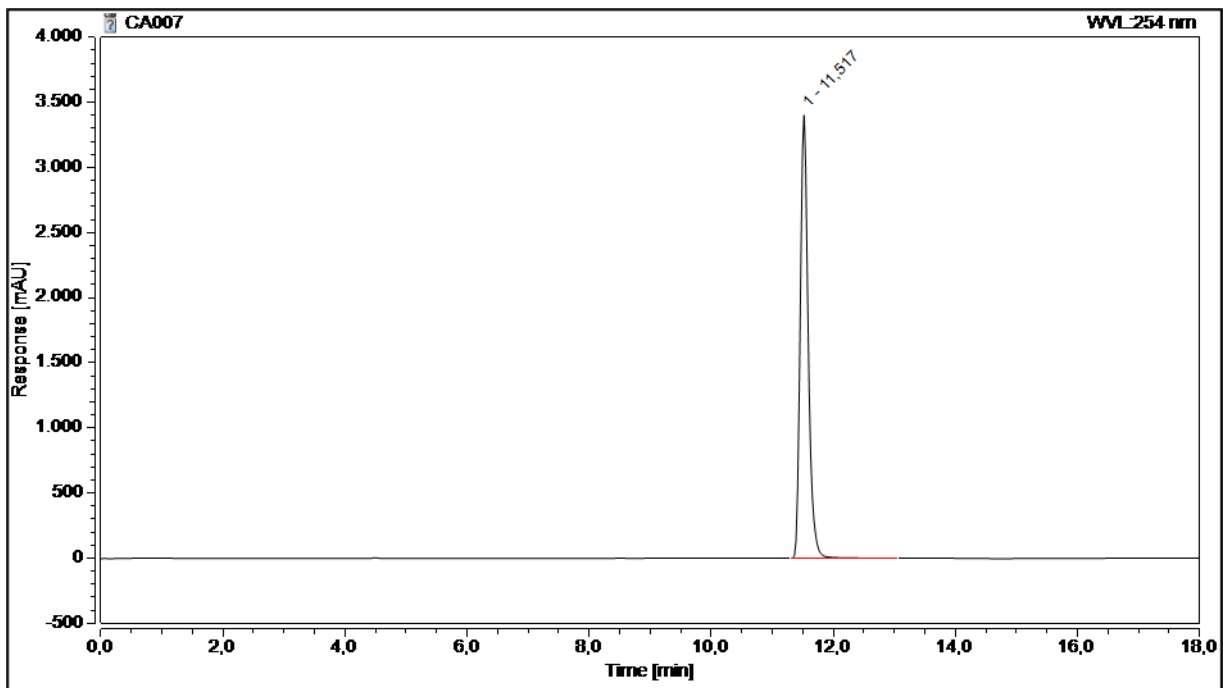

Figure S 1.10: HPLC chromatogram of CA007.

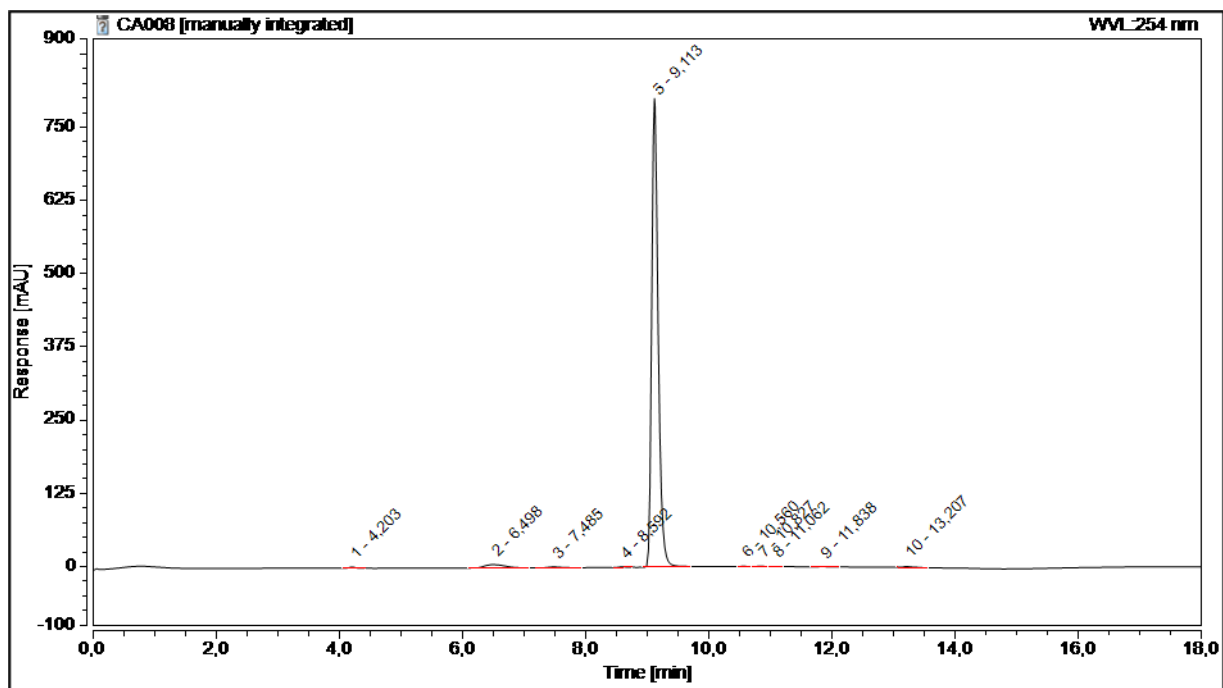

Figure S 1.11: HPLC chromatogram of CA008.

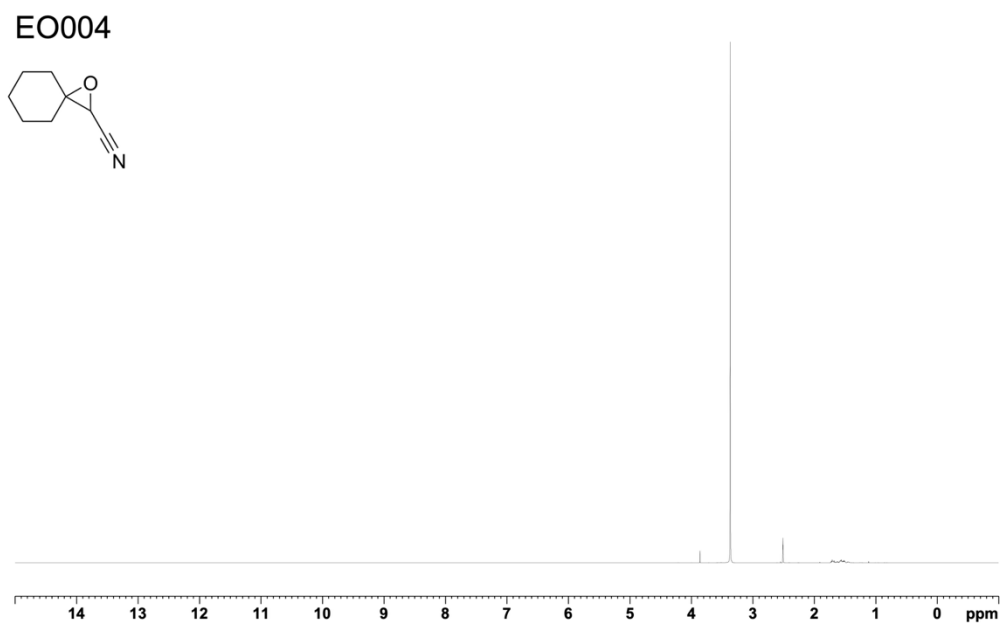

Figure S 1.12:  $^1\text{H-NMR}$  spectrum of EO004 in  $\text{DMSO-d}_6$ .  $\delta=3.86$  (s, 1H), 3.37 (s, water residual), 2.51 (m, DMSO residual), 1.73–1.42 (m, 10H).

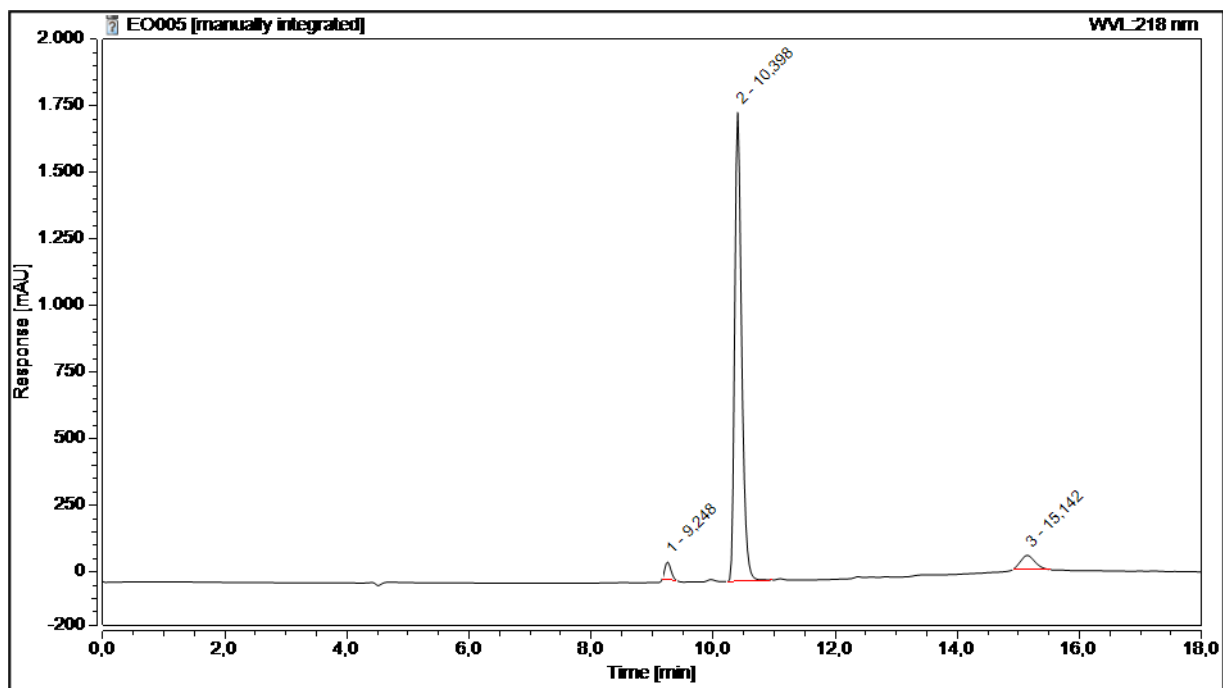

Figure S 1.13: HPLC chromatogram of EO005.

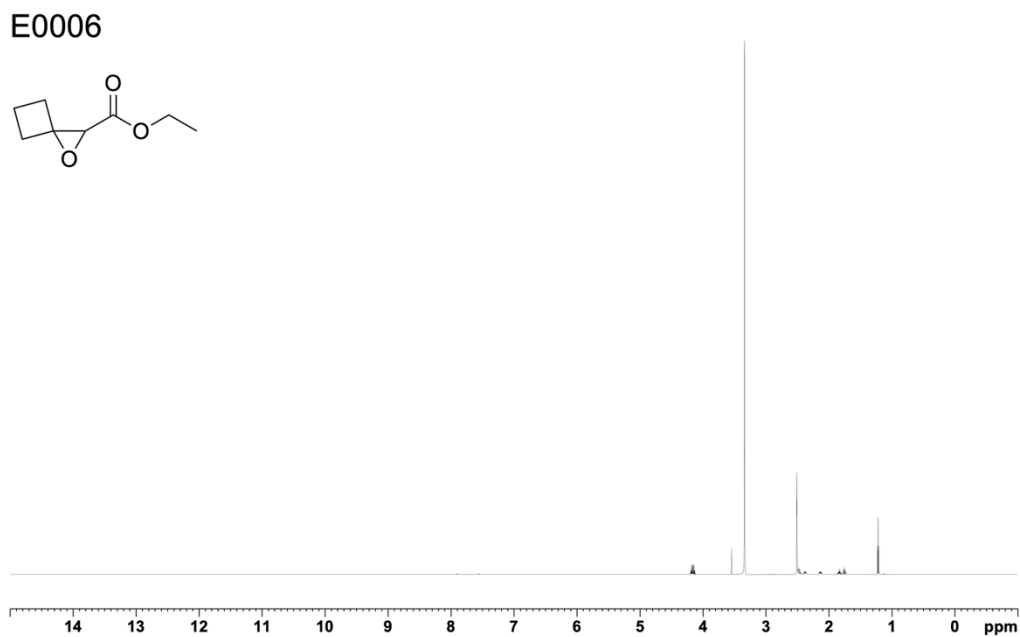

Figure S 1.14: <sup>1</sup>H-NMR spectrum of EO006 in DMSO-d<sub>6</sub>.  $\delta$ =4.19–4.13 (m, 2H), 3.54 (s, 1H), 3.34 (s, water residual), 2.51 (m, DMSO residual), 2.49–2.44 (m, 2H), 2.41–2.35 (m, 1H), 2.16–2.11 (m, 1H), 1.86–1.73 (m, 2H), 1.22 ppm (t, J=7.1 Hz, 3H).

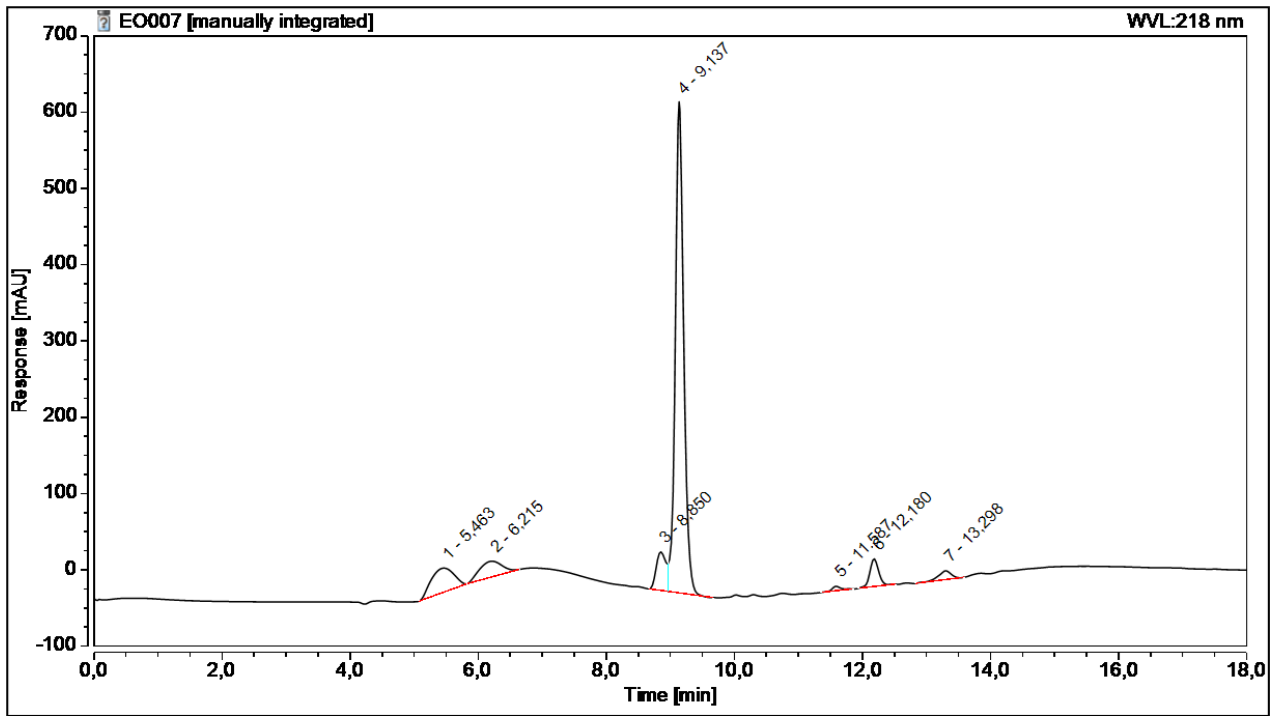

Figure S 1.15: HPLC chromatogramm of EO007.

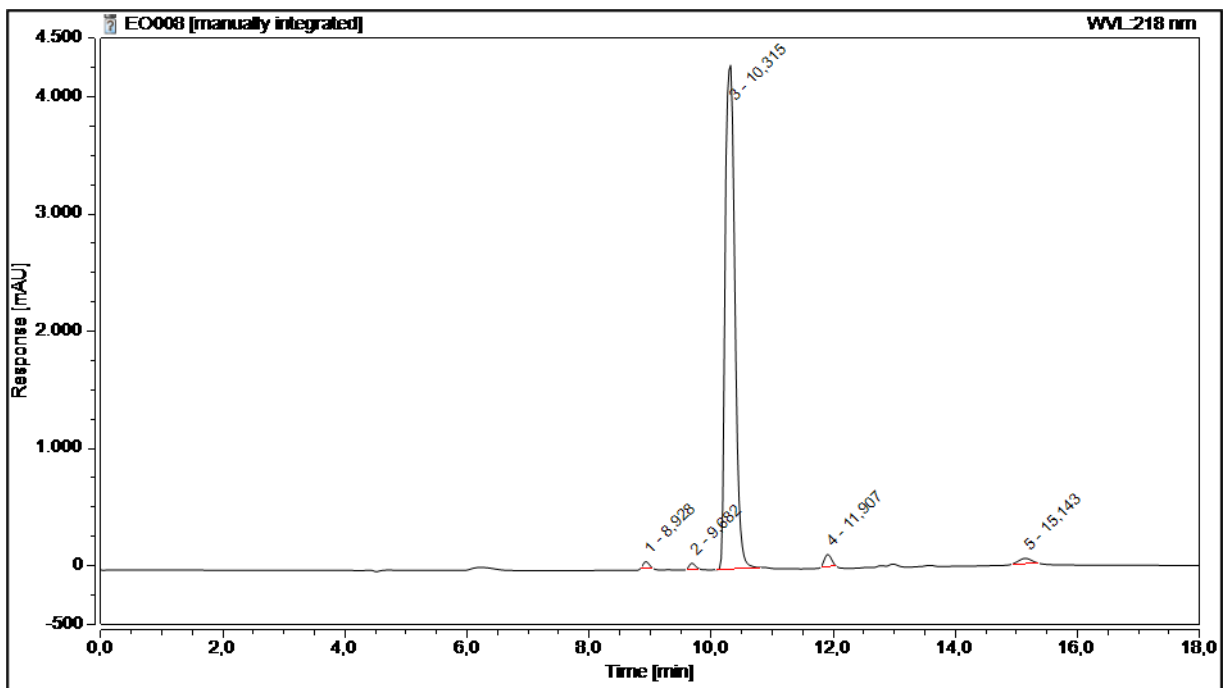

Figure S 1.16: HPLC chromatogramm of EO008.

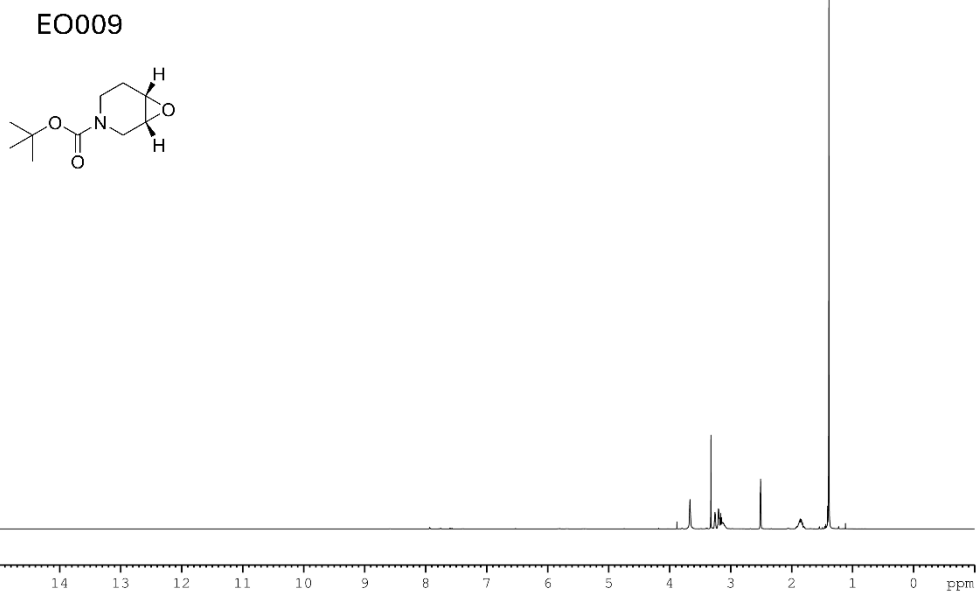

Figure S 1.17: <sup>1</sup>H-NMR spectrum of EO009 in CDCl<sub>3</sub>. δ=7.28 (s, CHCl<sub>3</sub> residual), 3.99 - 3.70 (m, 1H), 3.70 (m, 1H), 3.52 - 3.41 (m, 1H), 3.31 (m, 1H), 3.23 (s, 1H), 3.18 - 3.07 (m, 1H), 2.03 (m, 1H), 1.98 - 1.88 (m, 1H), 1.47 (s, 9H).

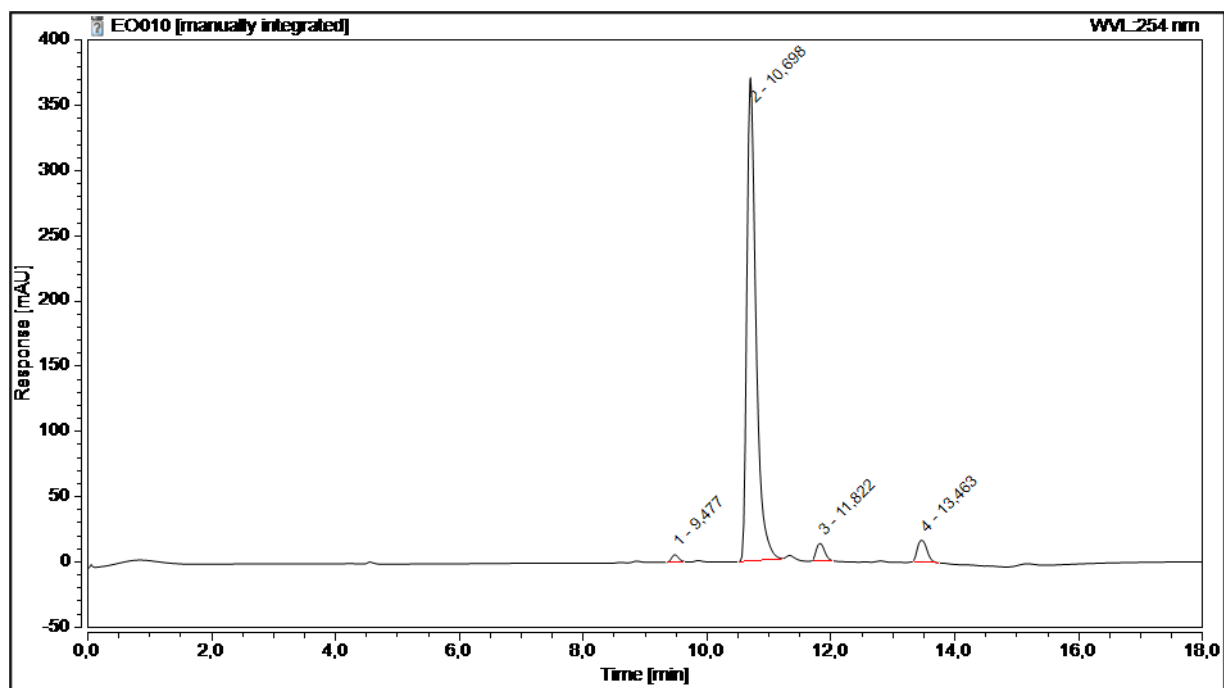

Figure S 1.18: HPLC chromatogram of EO010.

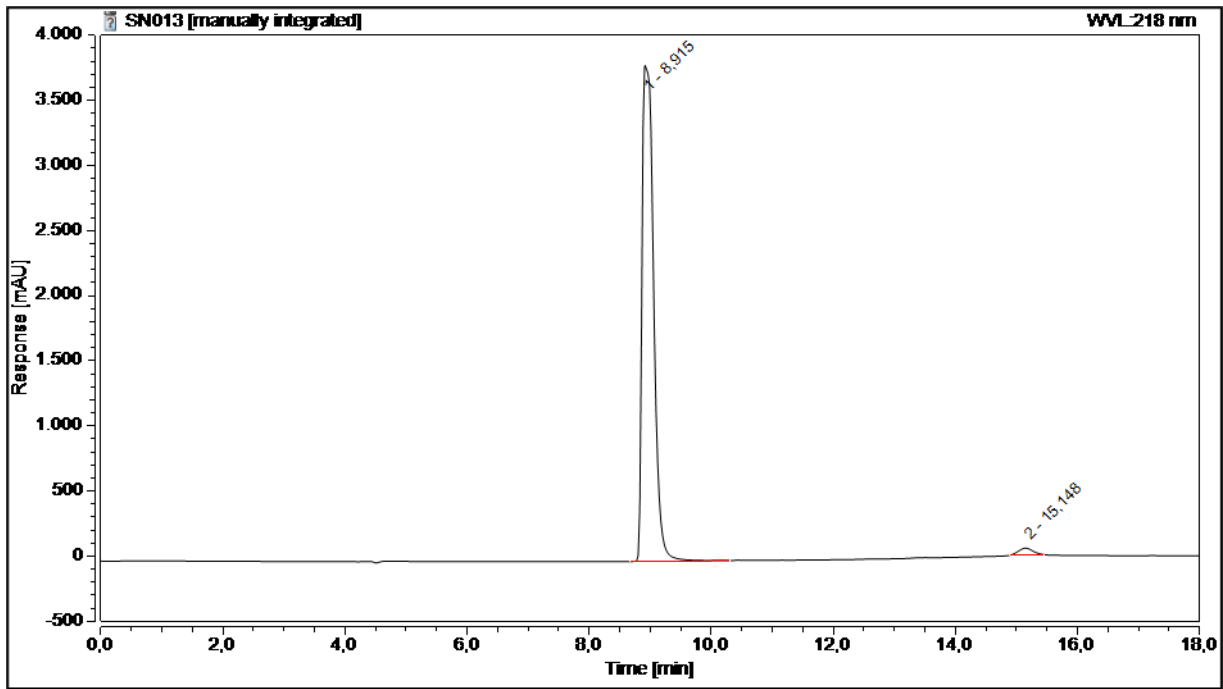

Figure S 1.19: HPLC chromatogramm of SN013.

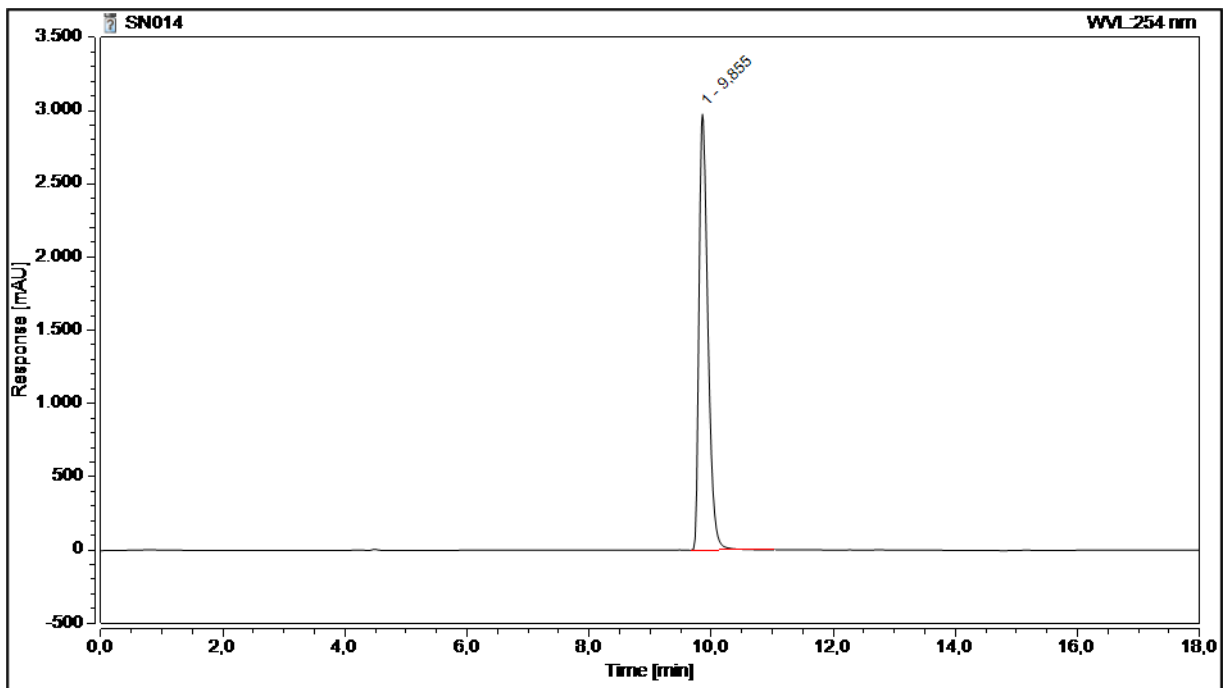

Figure S 1.20: HPLC chromatogramm of SN014.

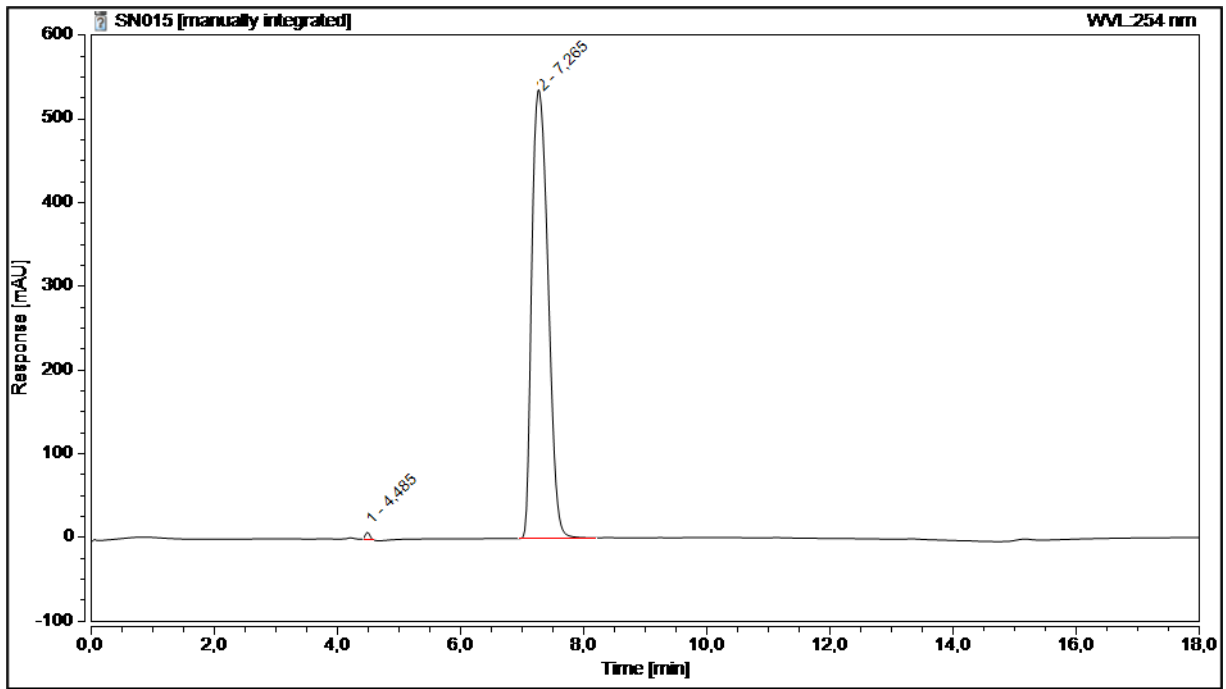

Figure S 1.21: HPLC chromatogramm of SN015.

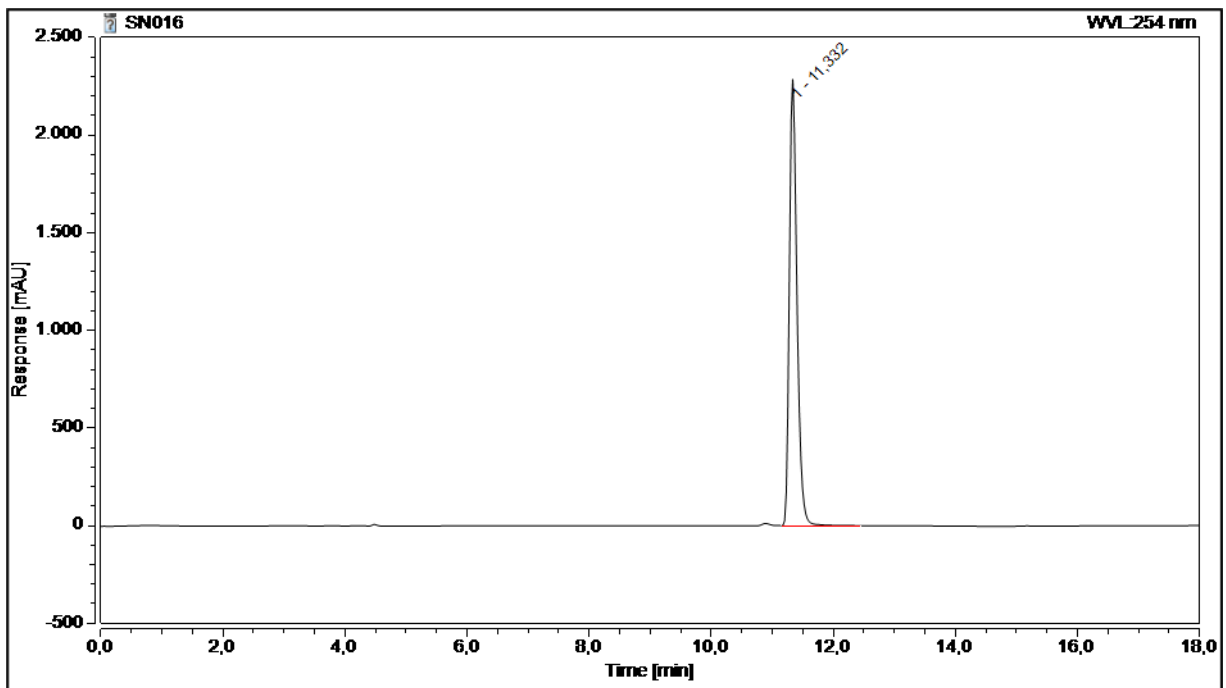

Figure S 1.22: HPLC chromatogramm of SN016.

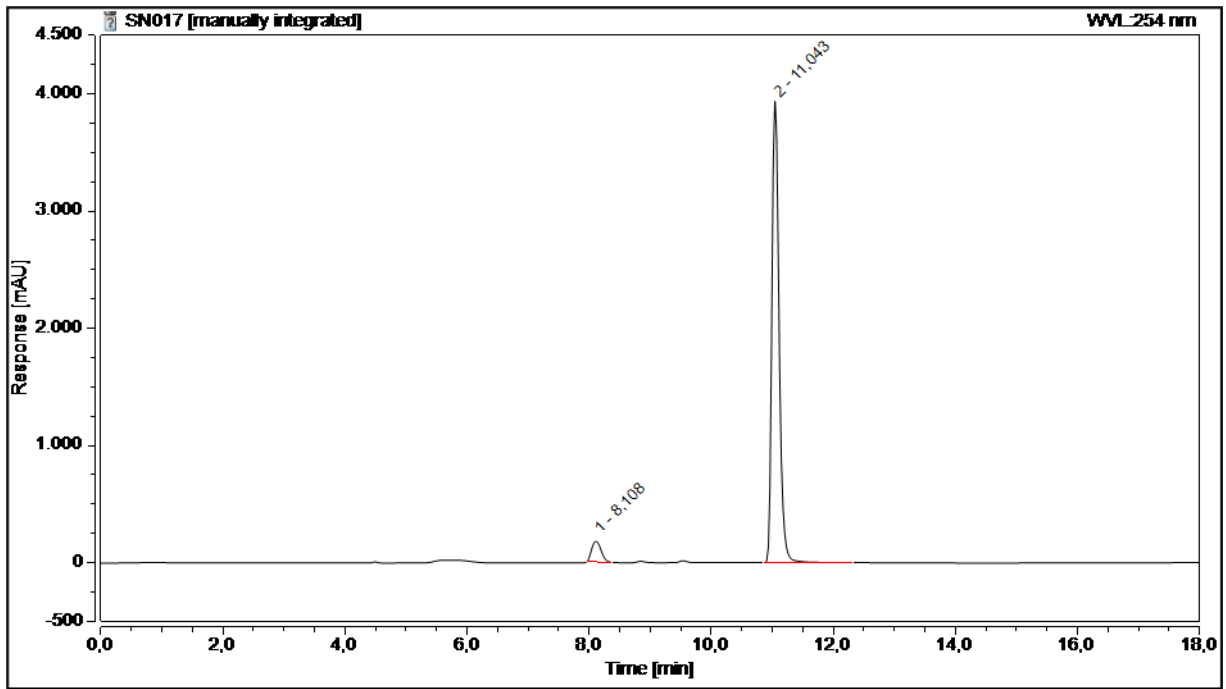

Figure S 1.23: HPLC chromatogramm of SN017.

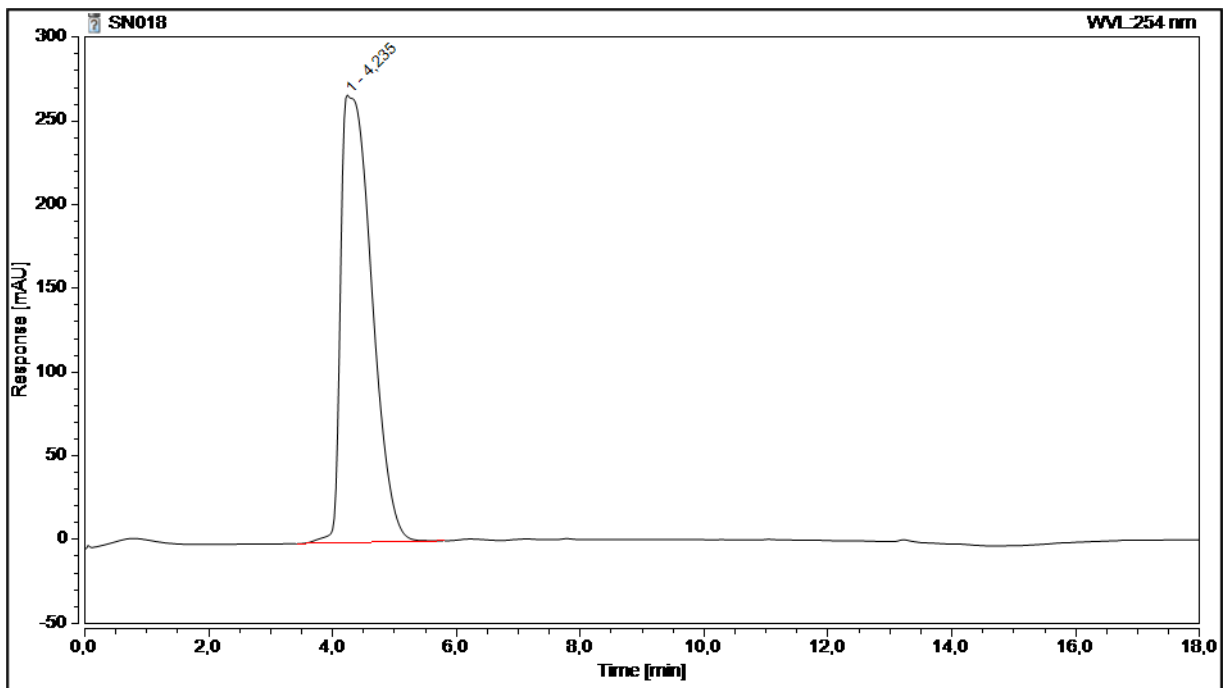

Figure S 1.24: HPLC chromatogramm of SN018.

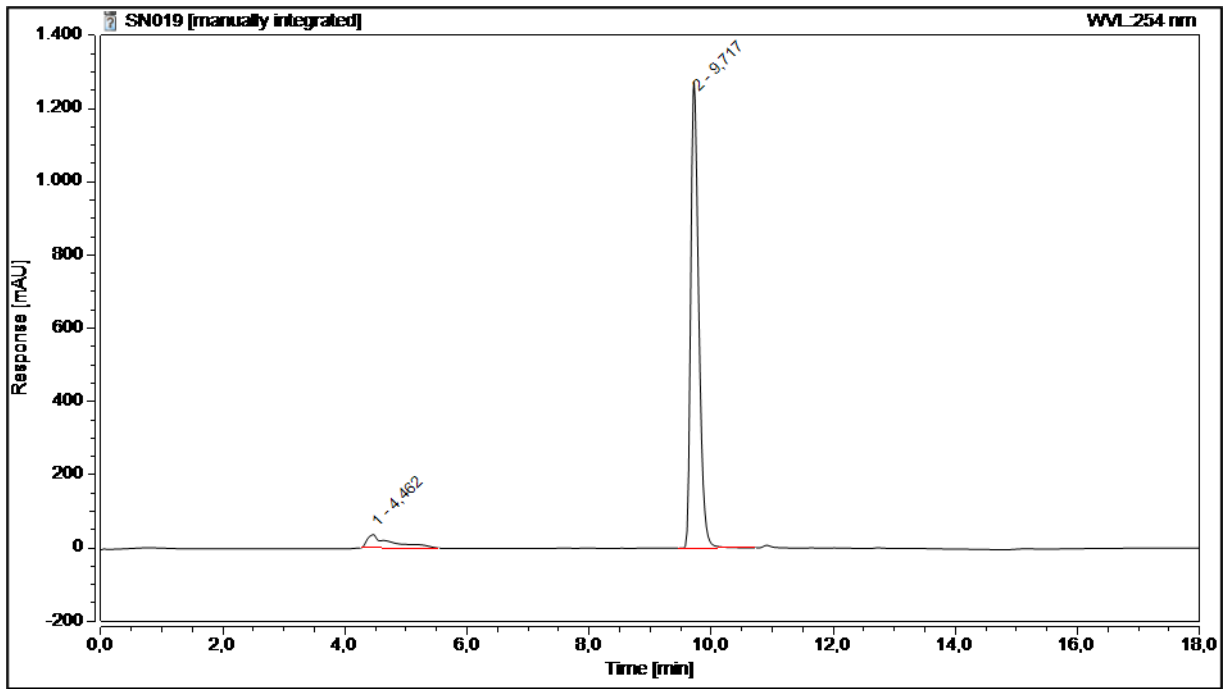

Figure S 1.25: HPLC chromatogramm of SN019.

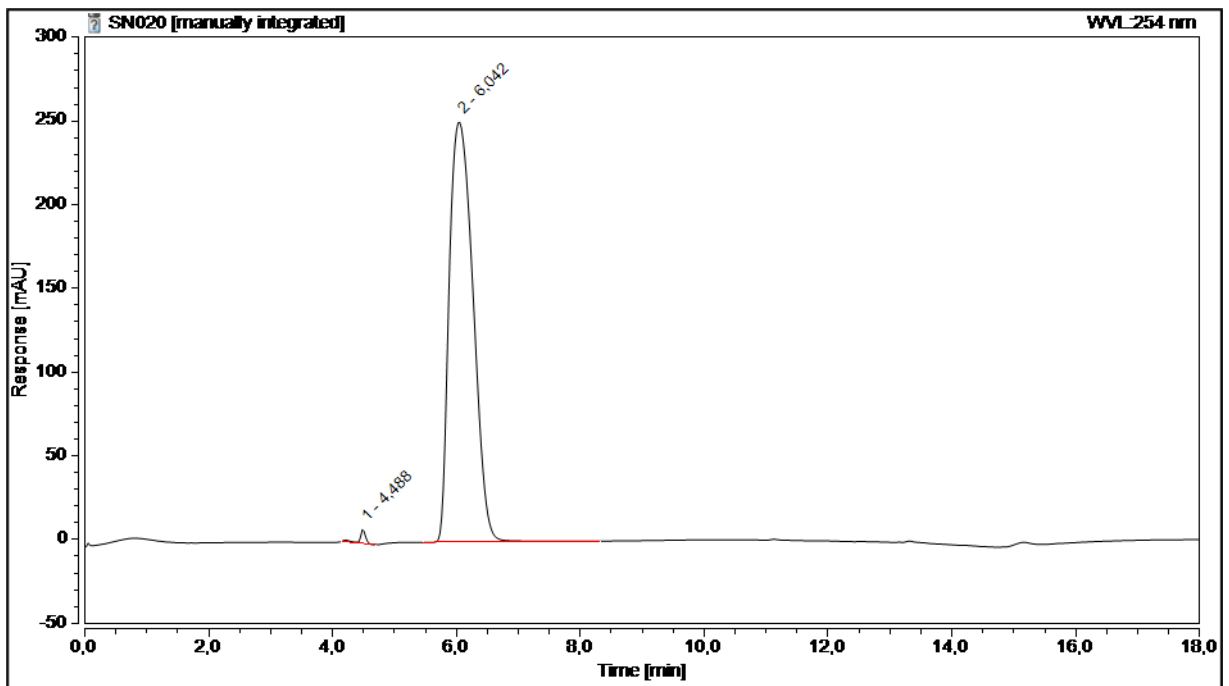

Figure S 1.26: HPLC chromatogramm of SN020.

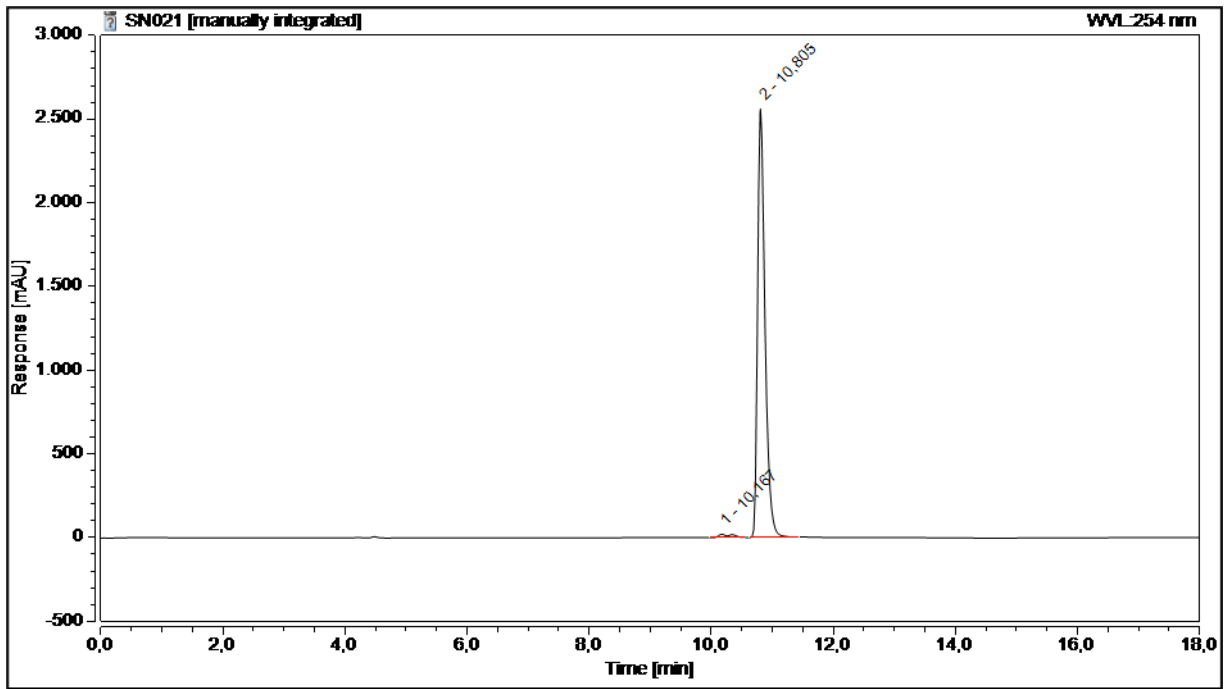

Figure S 1.27: HPLC chromatogramm of SN021.

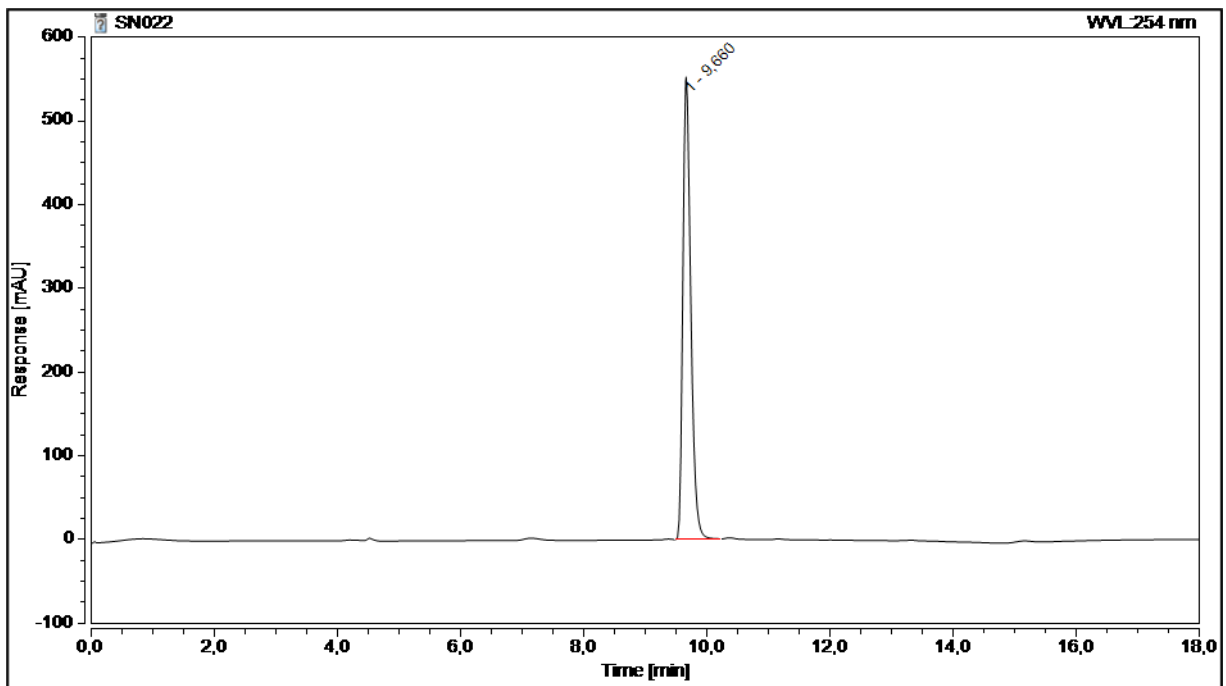

Figure S 1.28: HPLC chromatogramm of SN022.

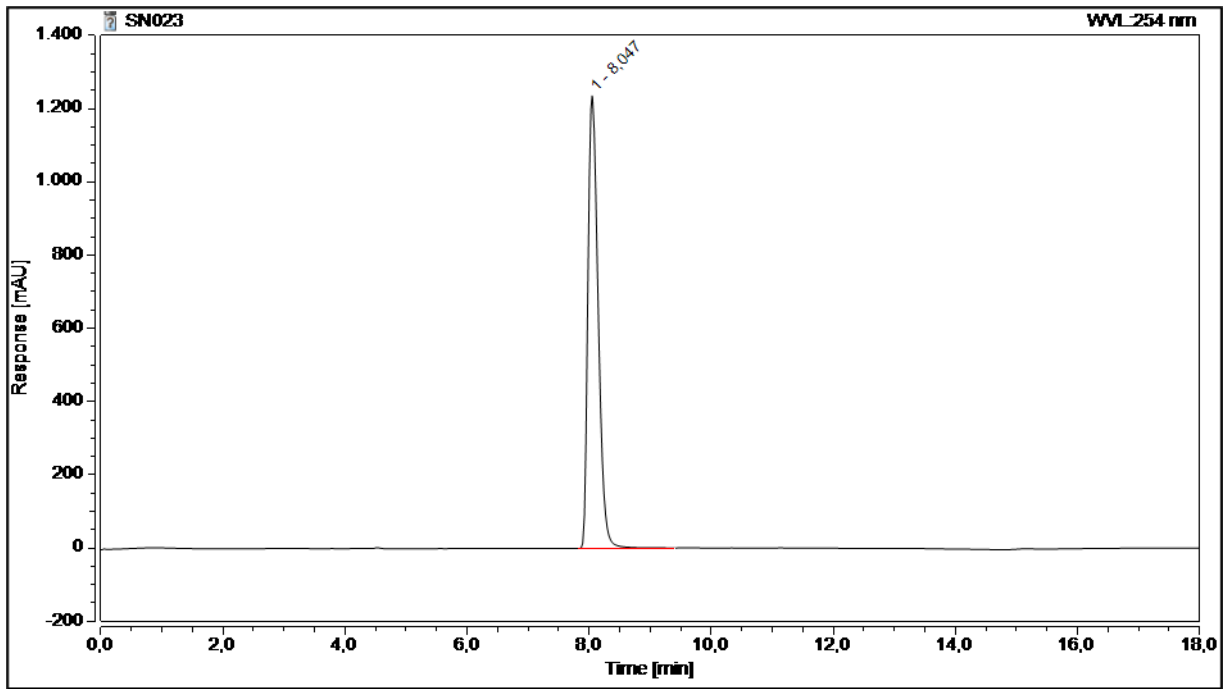

Figure S 1.29: HPLC chromatogramm of SN023.

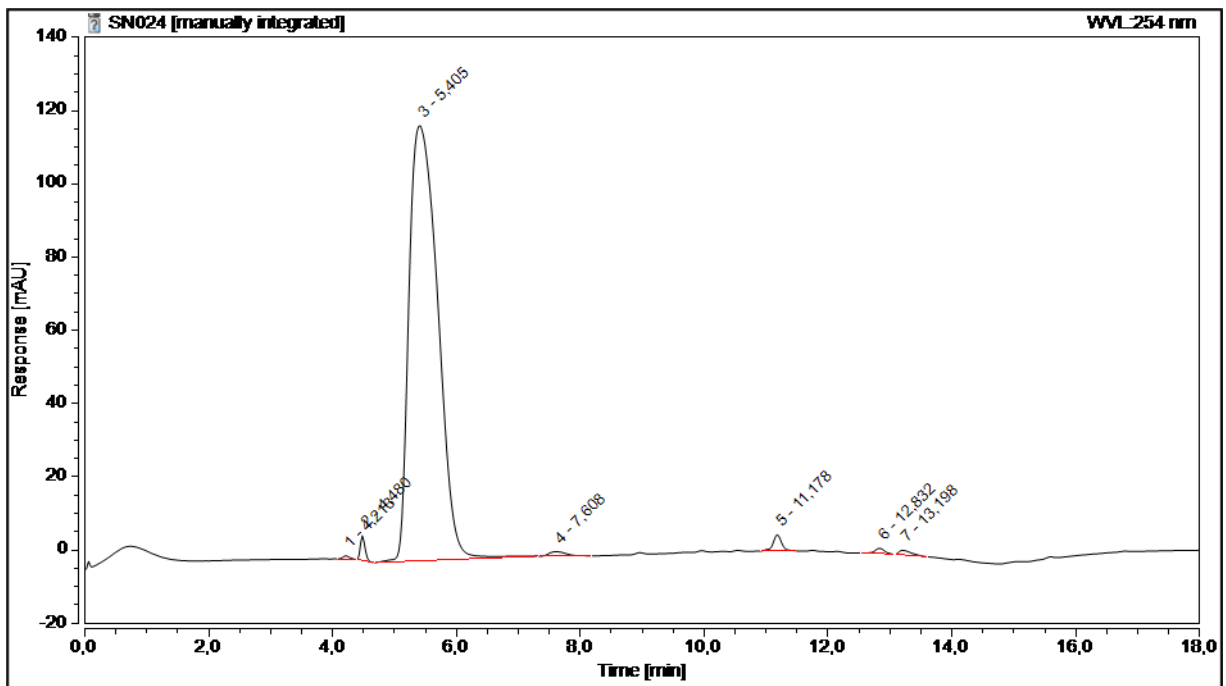

Figure S 1.30: HPLC chromatogramm of SN024.

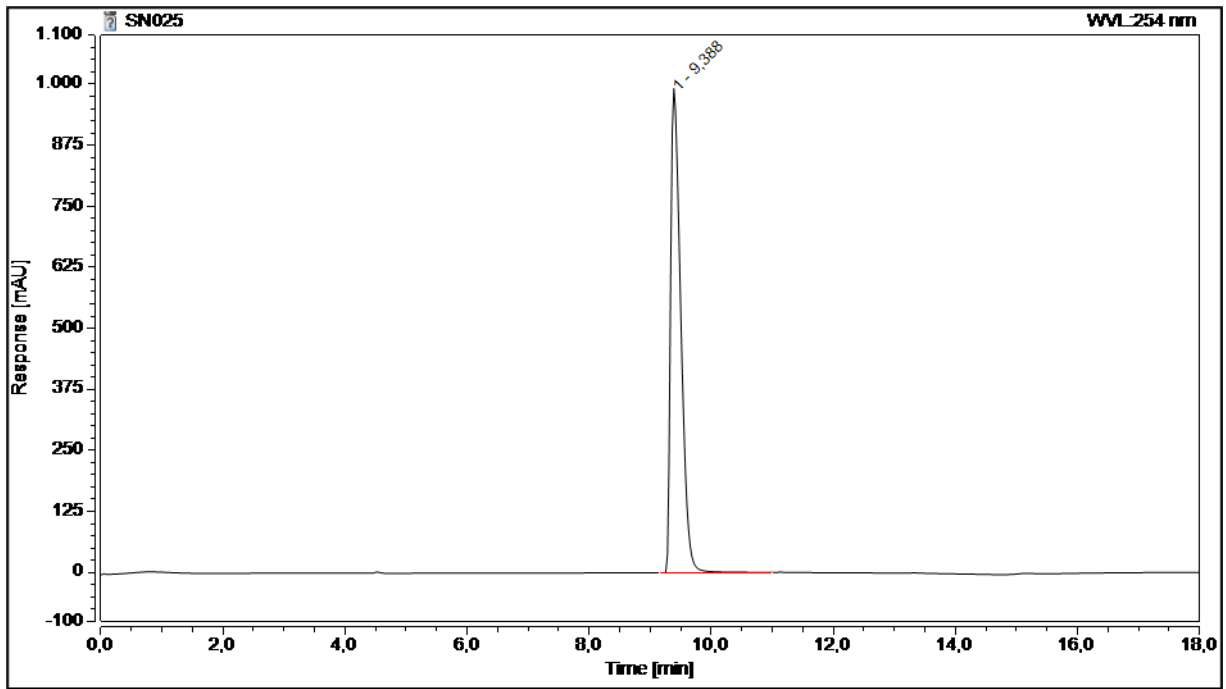

Figure S 1.31: HPLC chromatogramm of SN025.

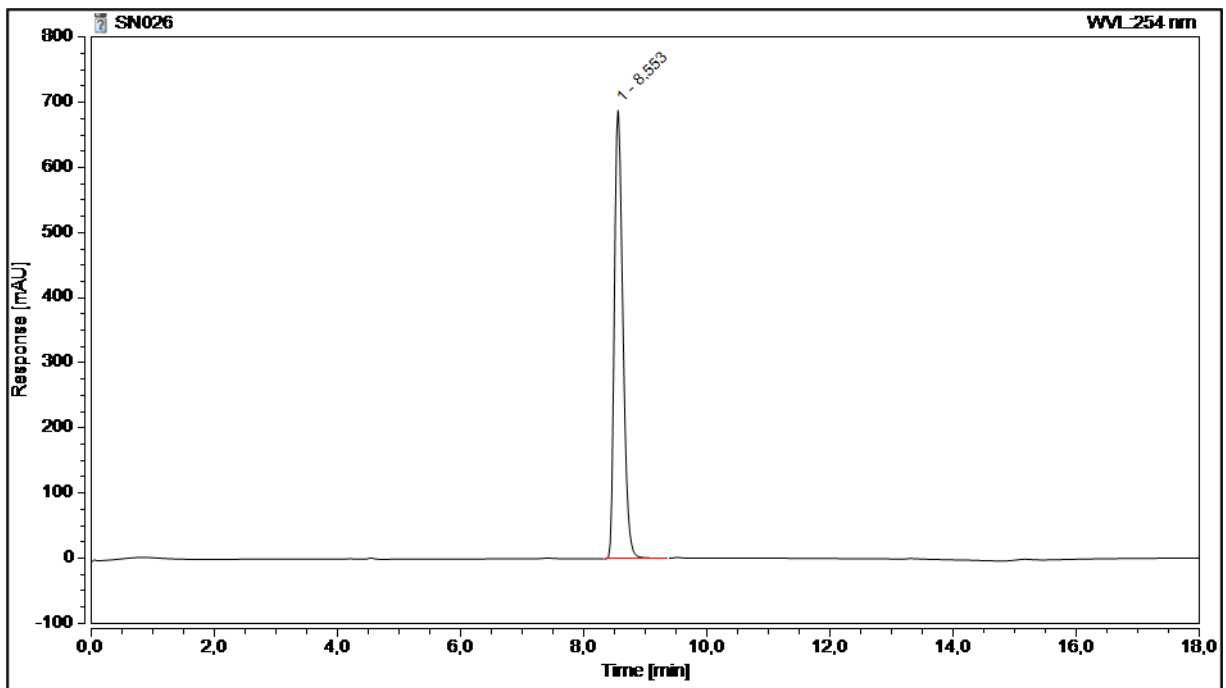

Figure S 1.32: HPLC chromatogramm of SN026.

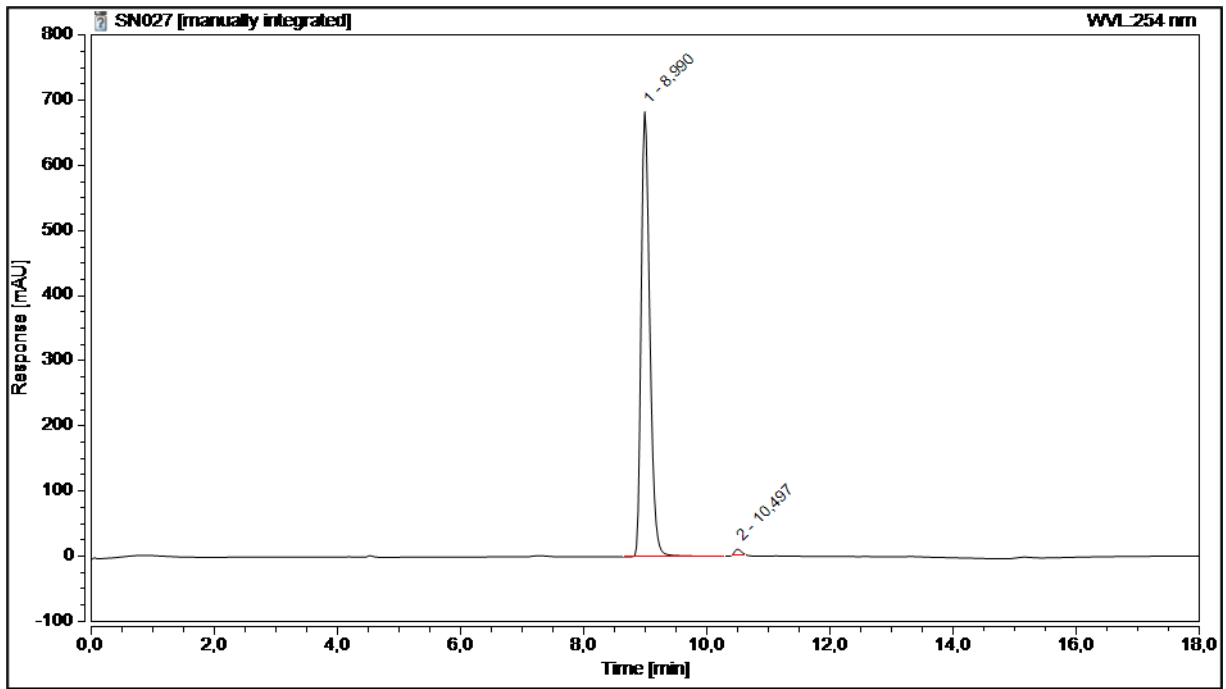

Figure S 1.33: HPLC chromatogramm of SN027.

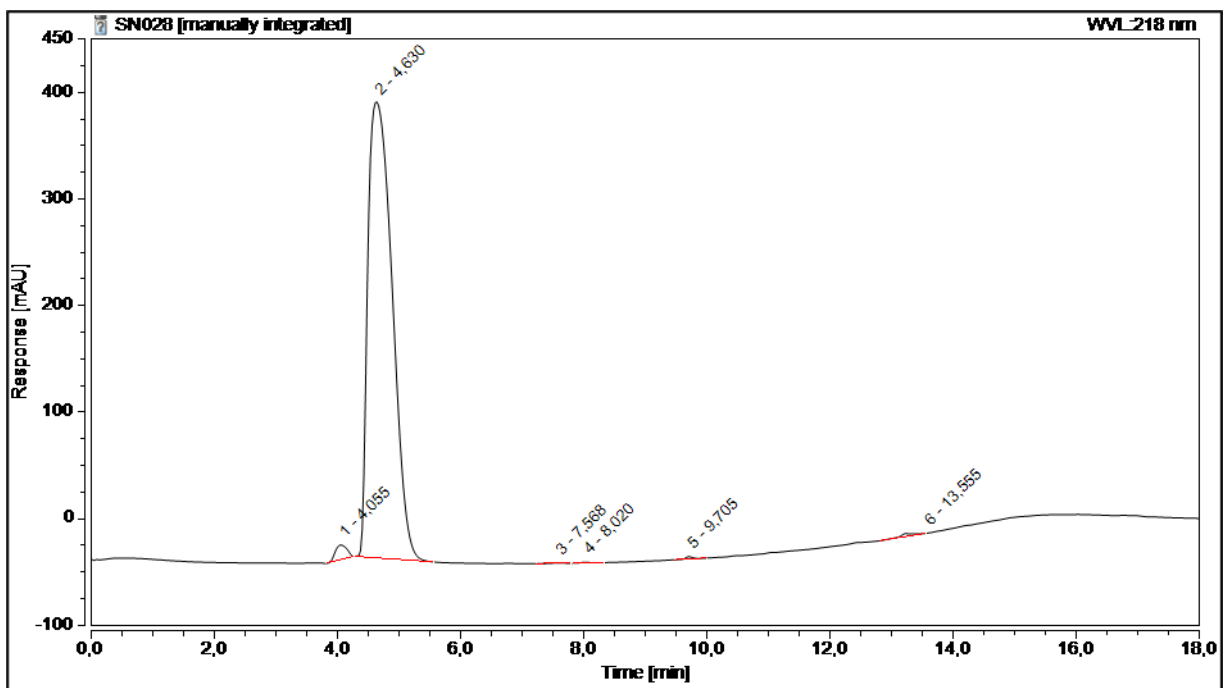

Figure S 1.34: HPLC chromatogramm of SN028.

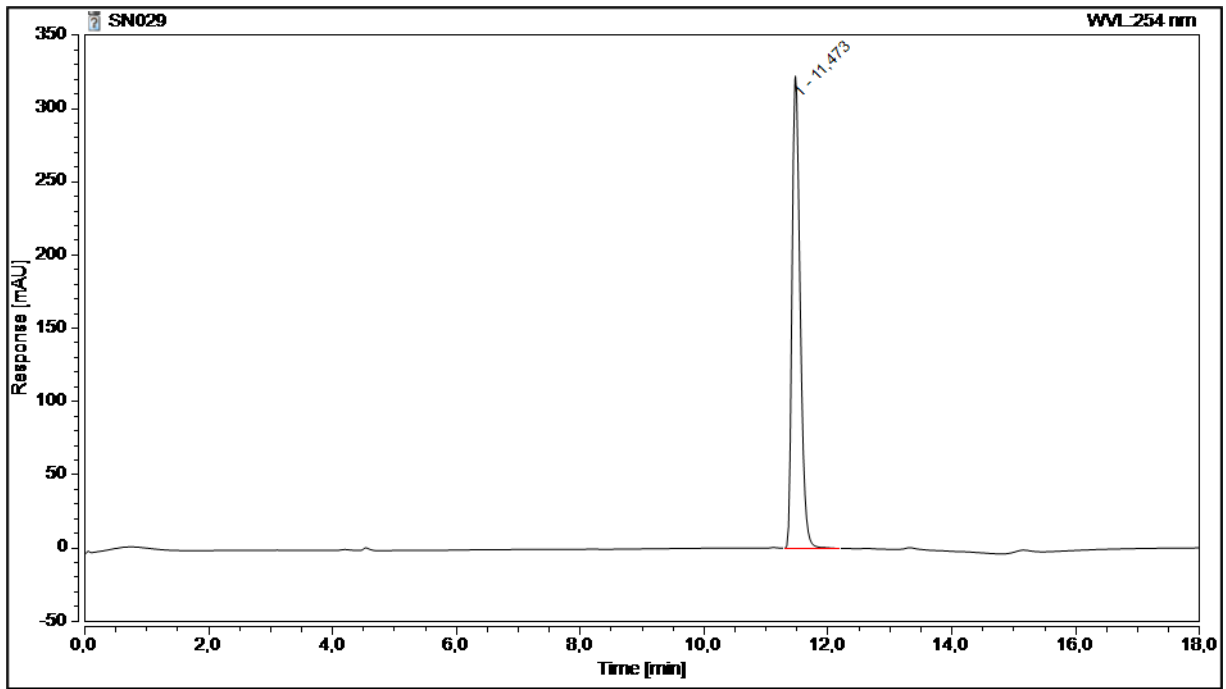

Figure S 1.35: HPLC chromatogramm of SN029.

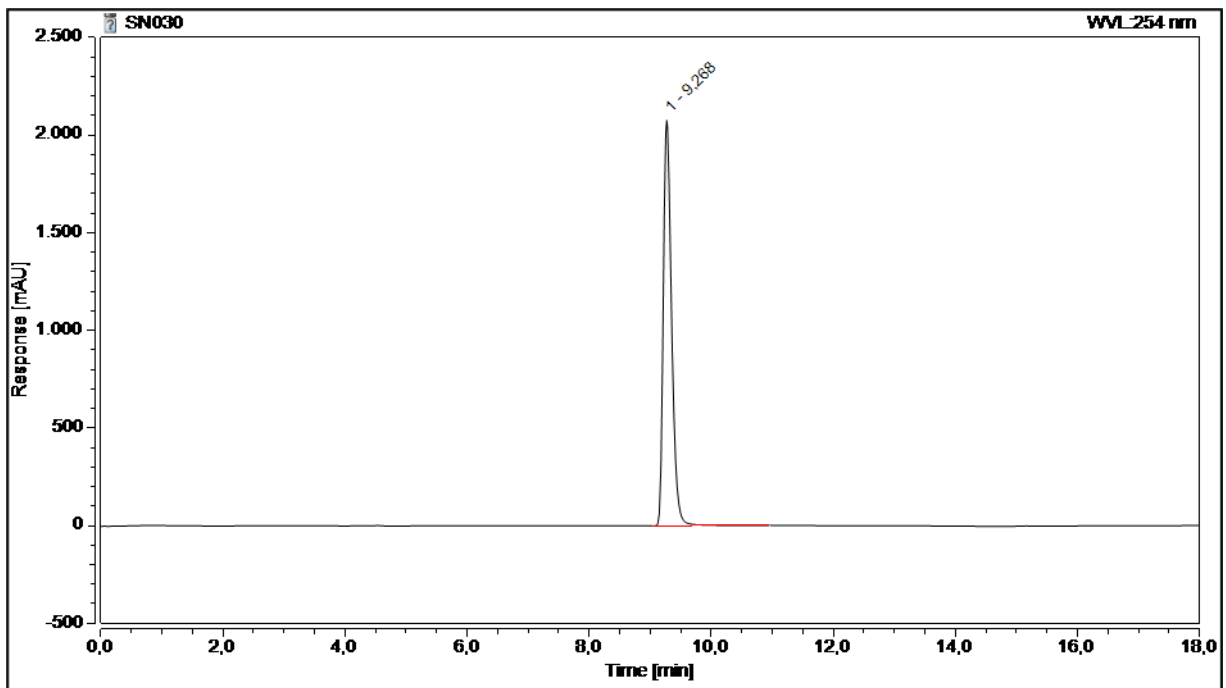

Figure S 1.36: HPLC chromatogramm of SN030.

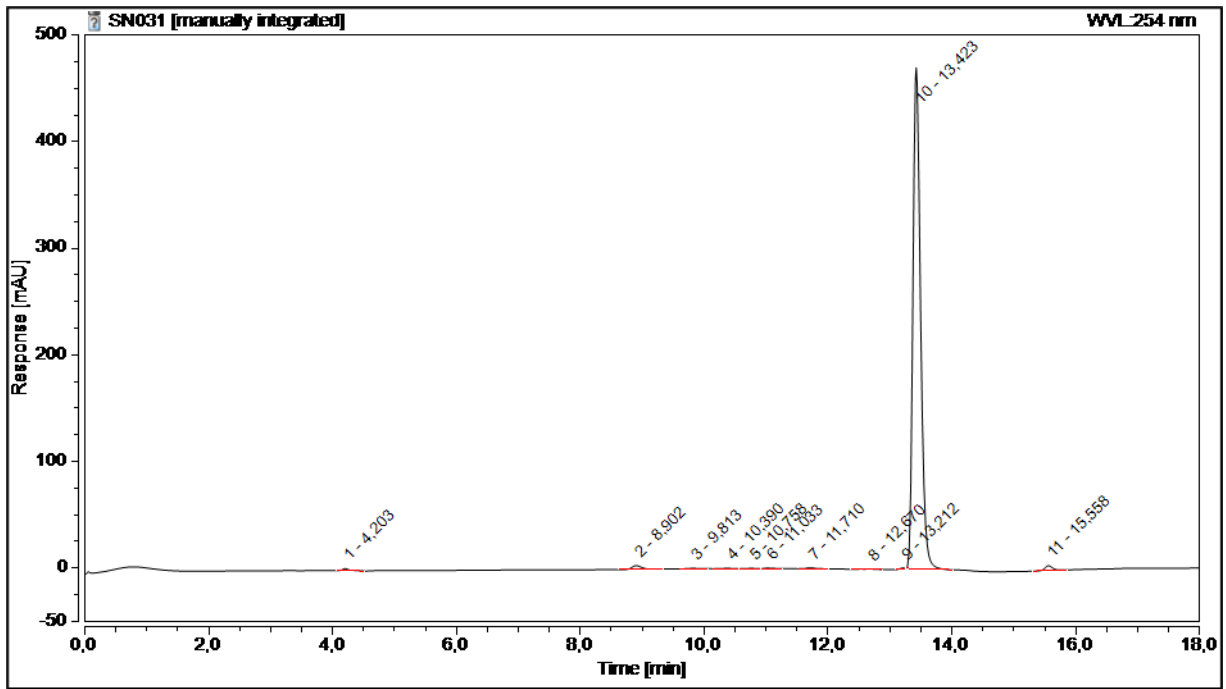

Figure S 1.37: HPLC chromatogramm of SN031.

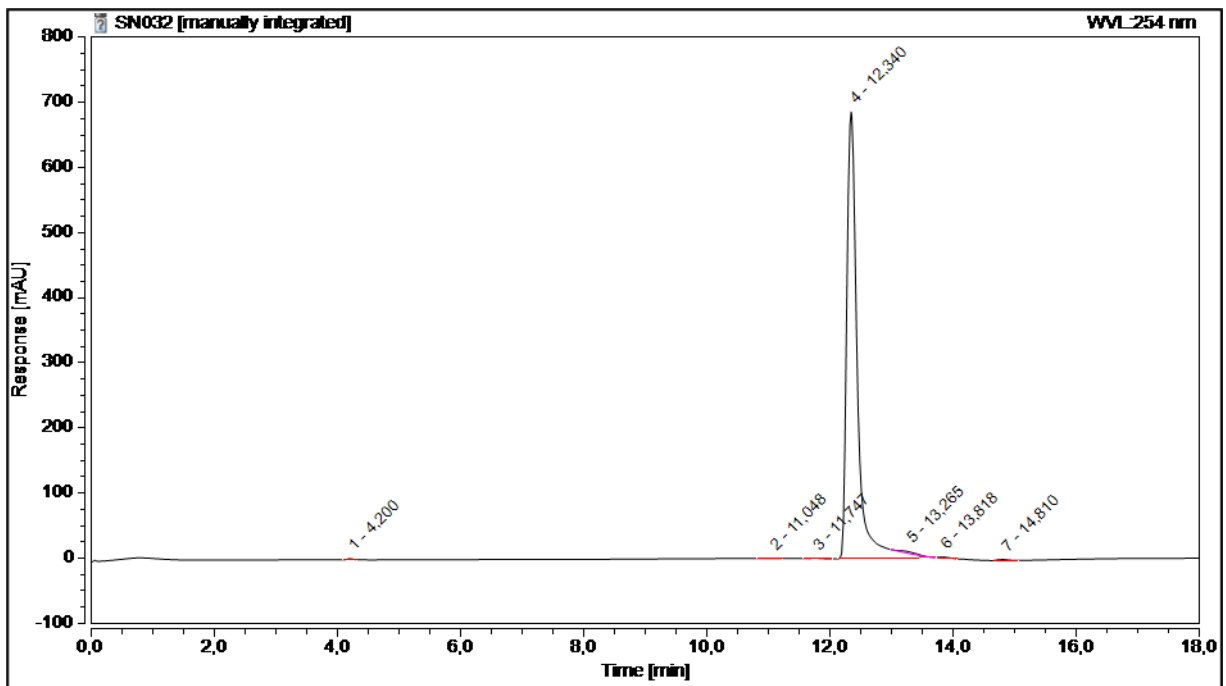

Figure S 1.38: HPLC chromatogramm of SN032.

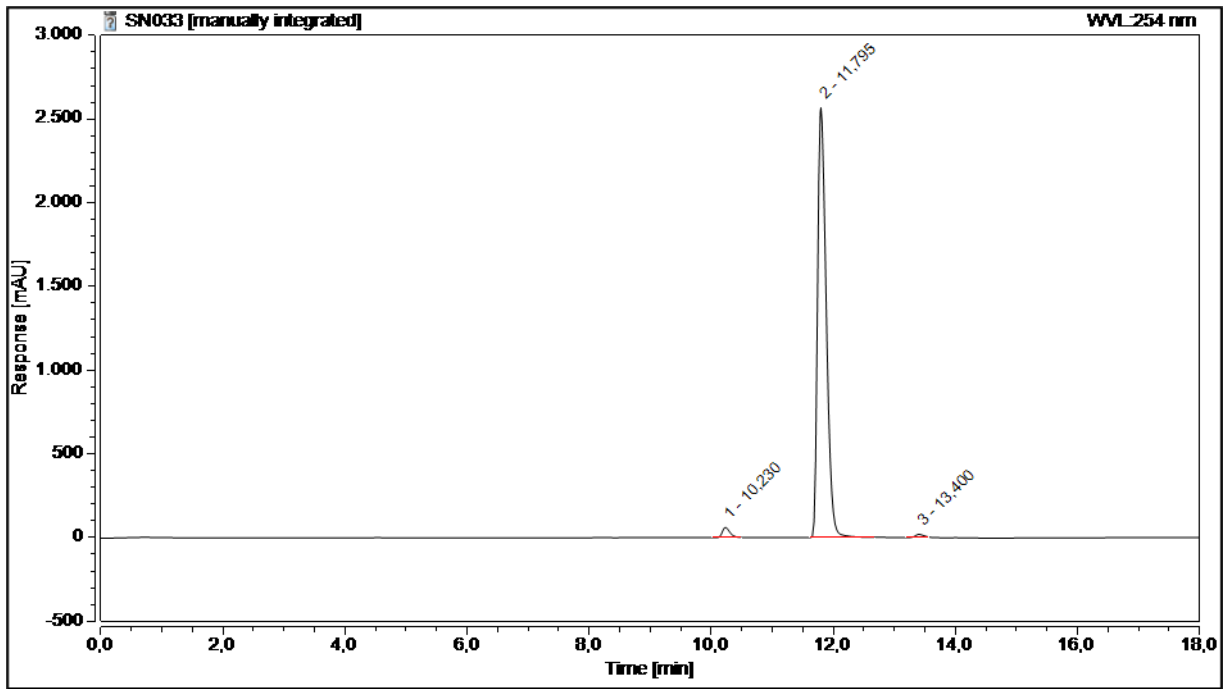

Figure S 1.39: HPLC chromatogramm of SN033.

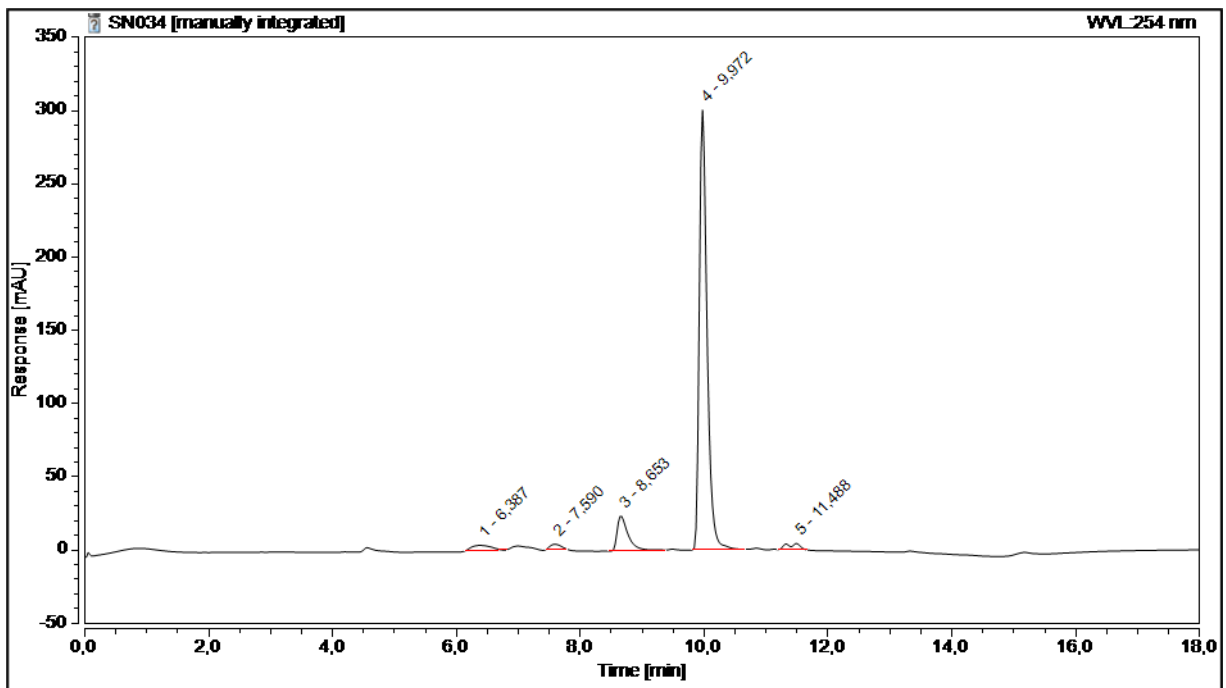

Figure S 1.40: HPLC chromatogramm of SN034.

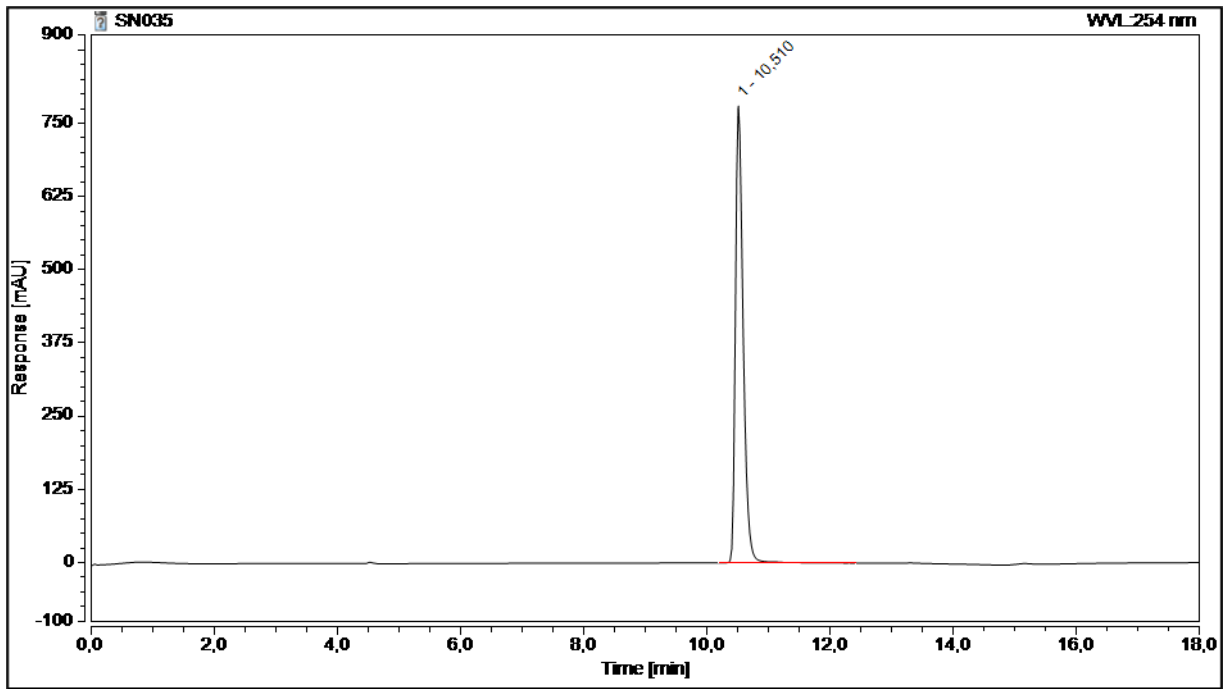

Figure S 1.41: HPLC chromatogramm of SN035.

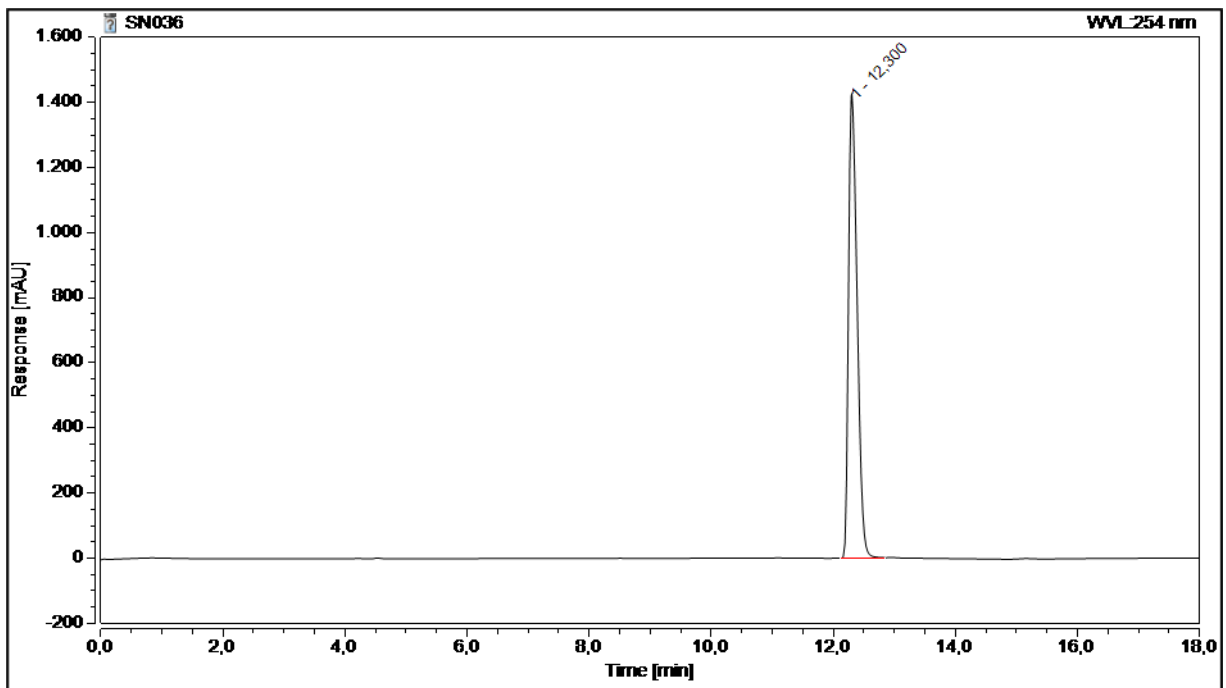

Figure S 1.42: HPLC chromatogramm of SN036.

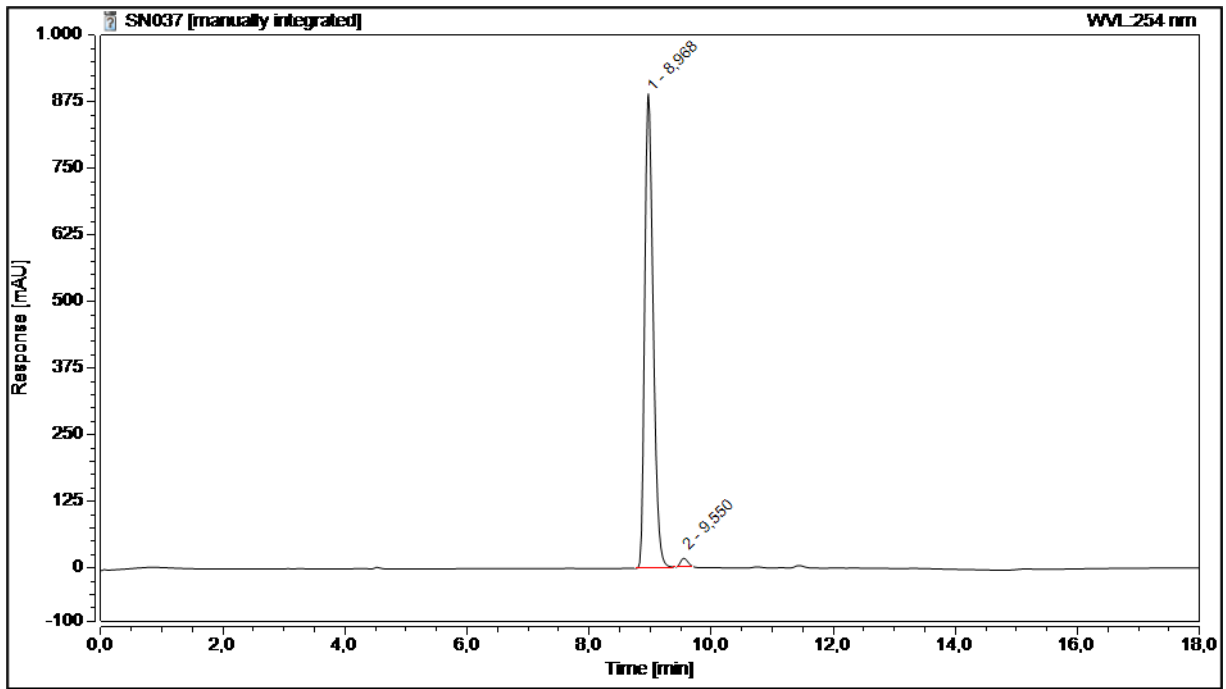

Figure S 1.43: HPLC chromatogram of SN037.

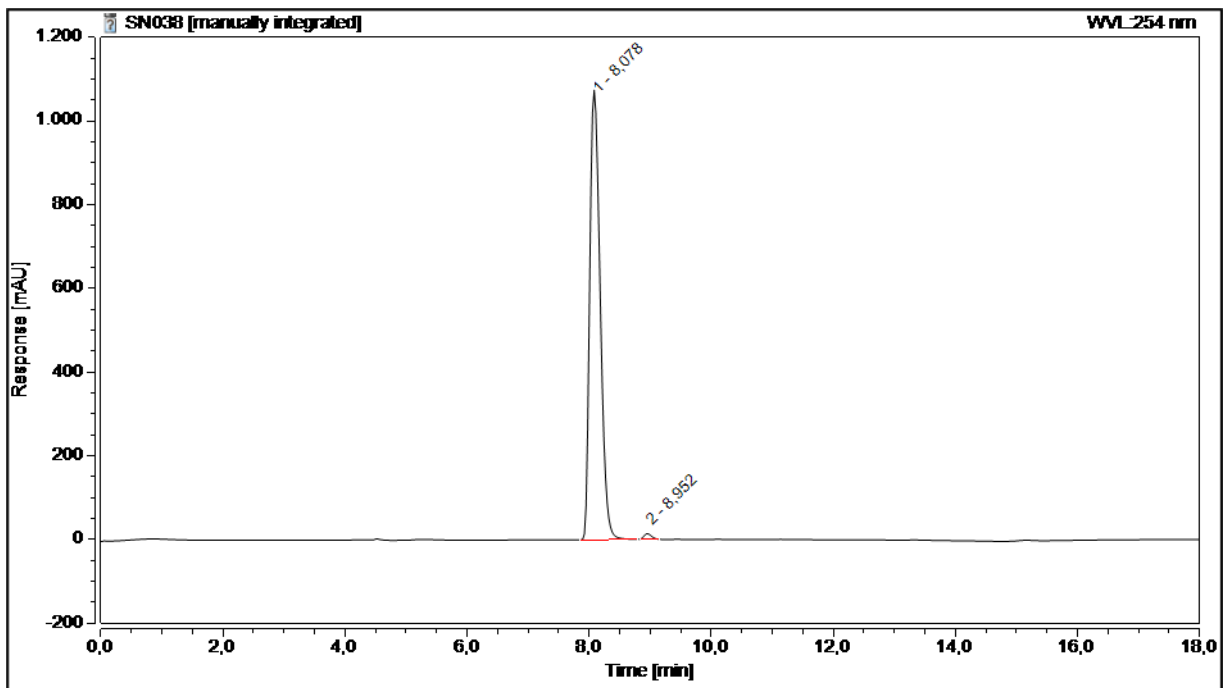

Figure S 1.44: HPLC chromatogram of SN038.

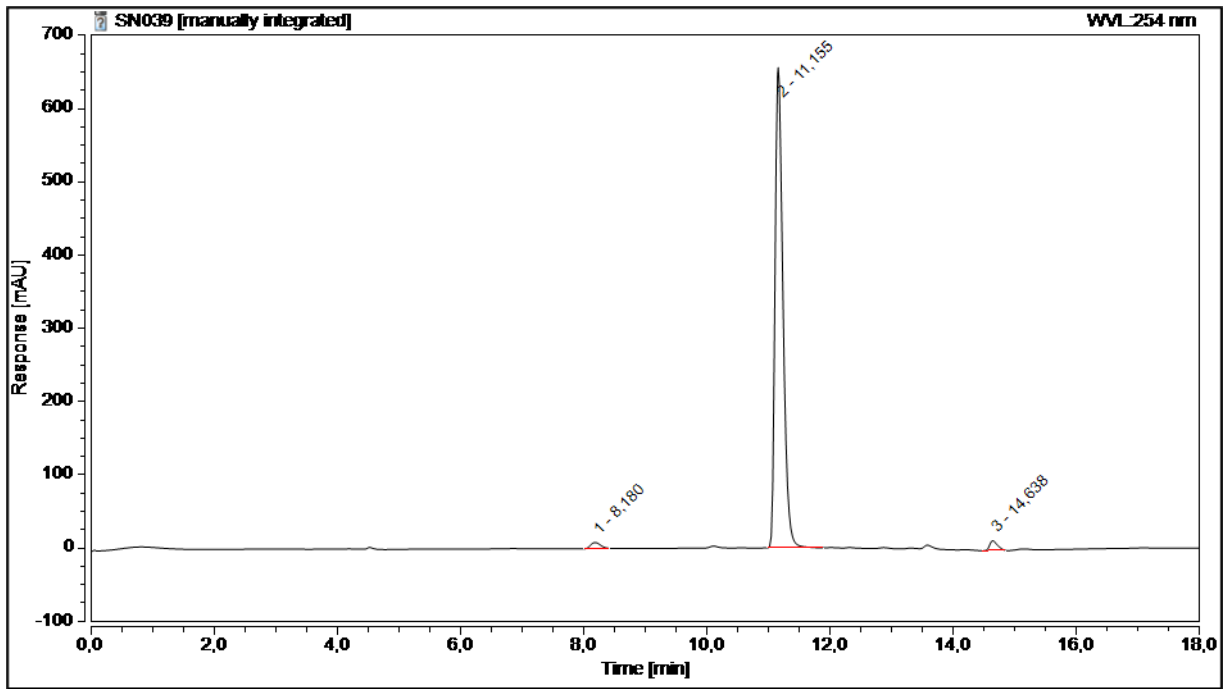

Figure S 1.45: HPLC chromatogramm of SN039.

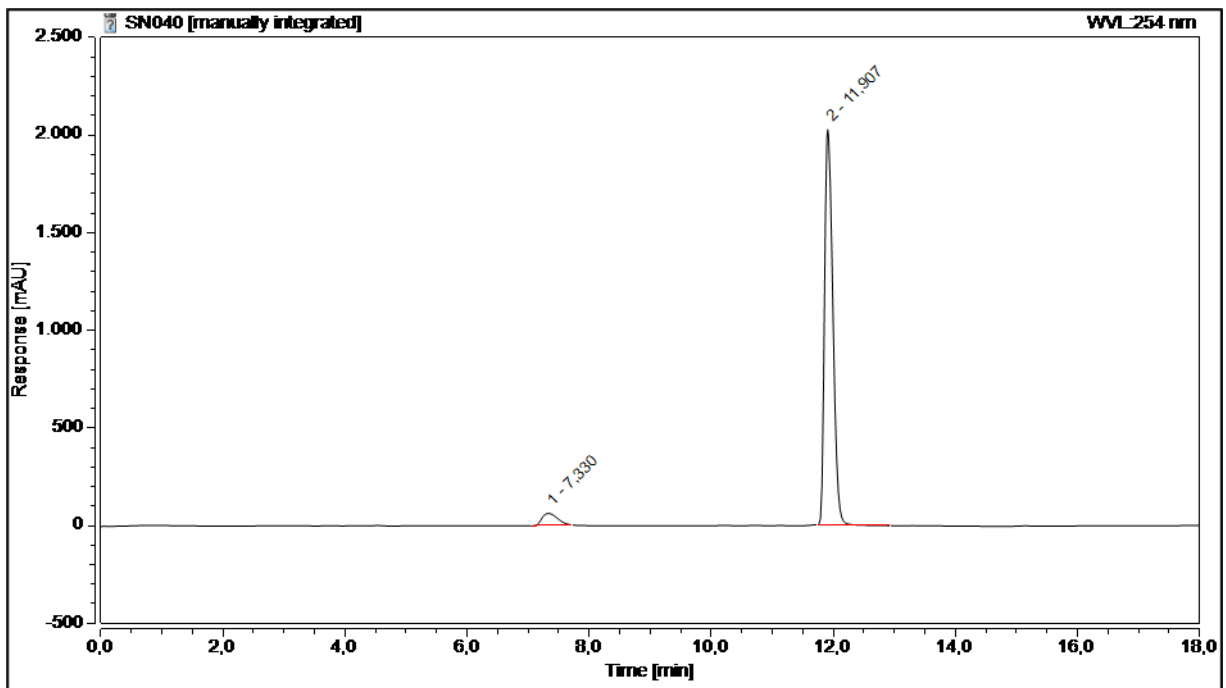

Figure S 1.46: HPLC chromatogramm of SN040.

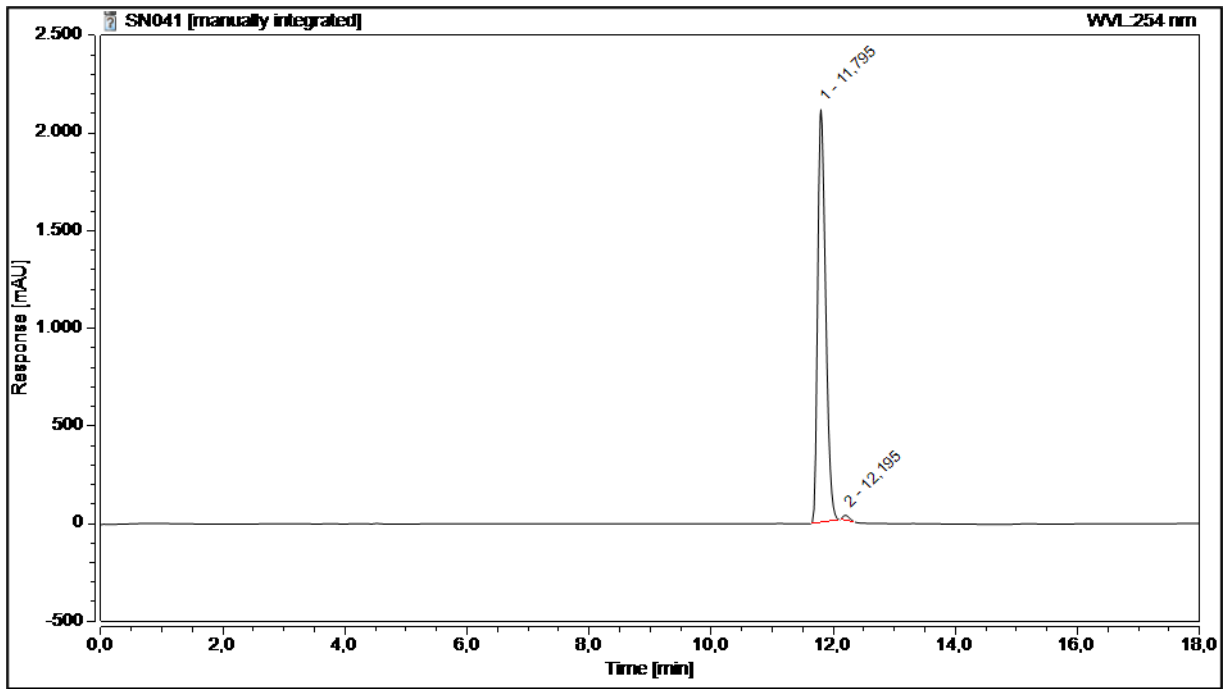

Figure S 1.47: HPLC chromatogramm of SN041.

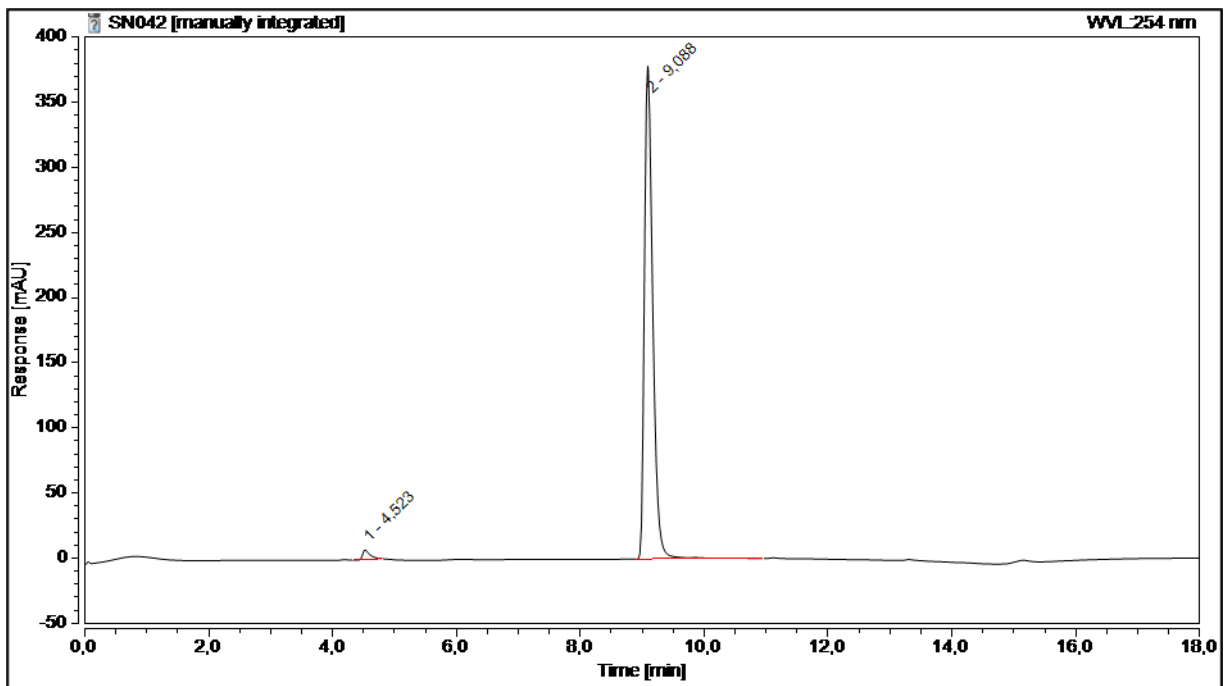

Figure S 1.48: HPLC chromatogramm of SN042.

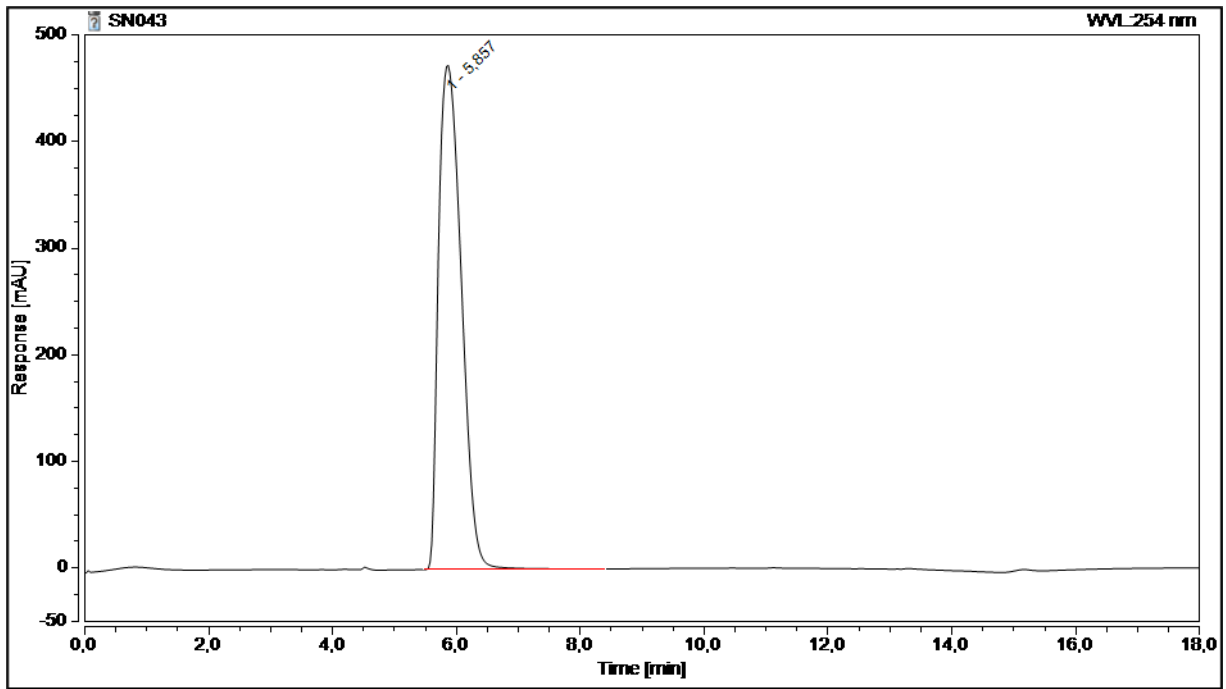

Figure S 1.49: HPLC chromatogramm of SN043.

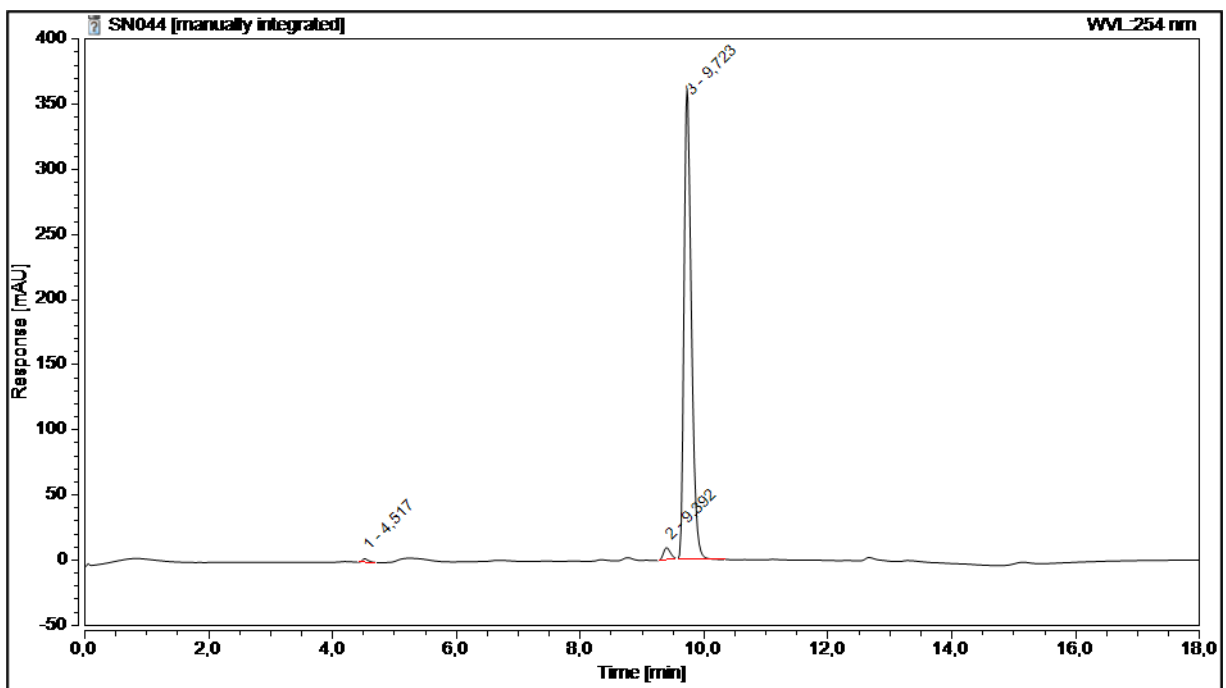

Figure S 1.50: HPLC chromatogramm of SN044.

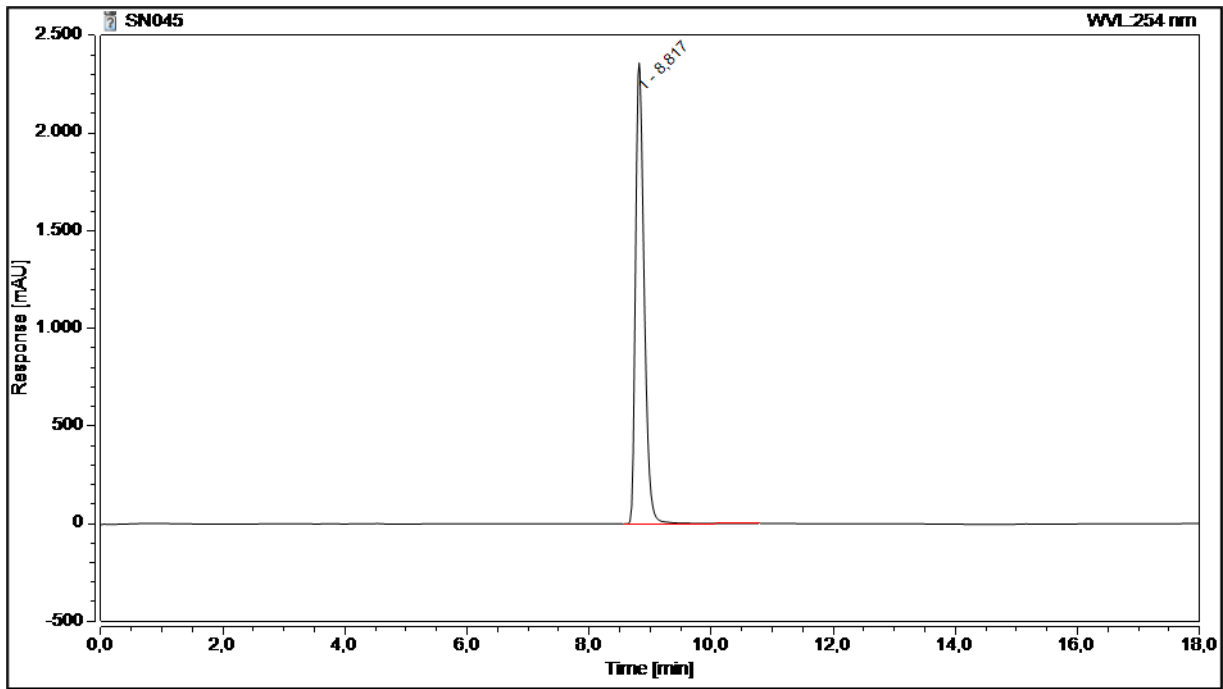

Figure S 1.51: HPLC chromatogramm of SN045.

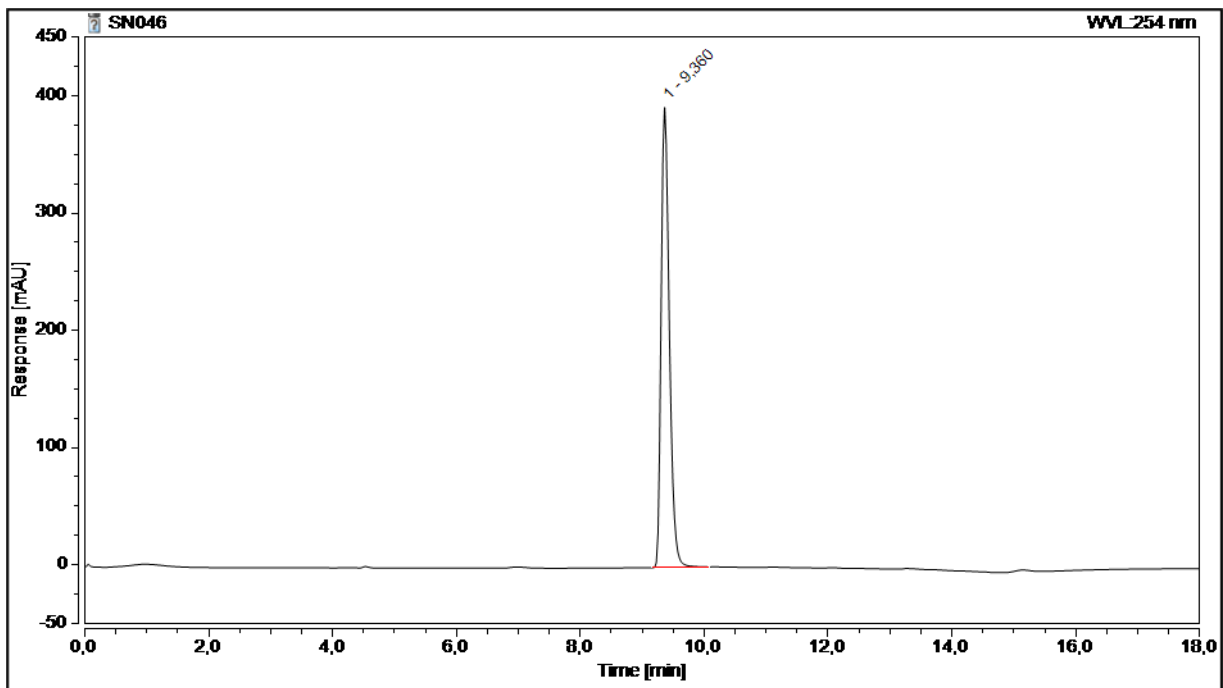

Figure S 1.52: HPLC chromatogramm of SN046.

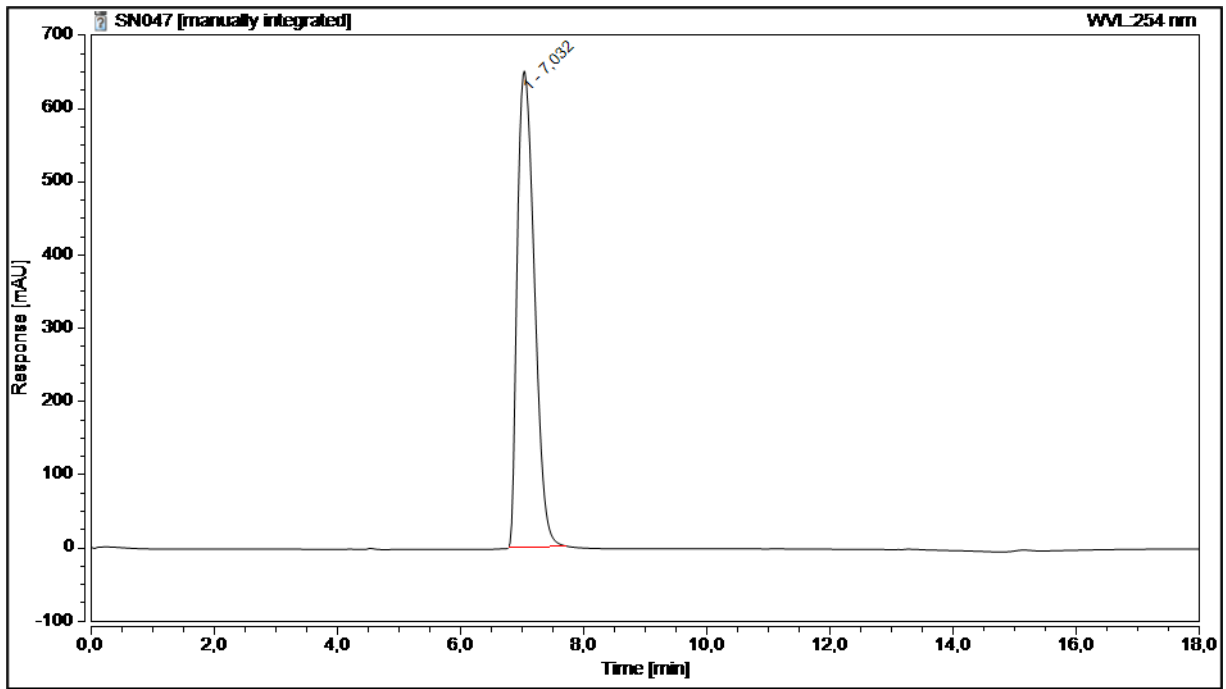

Figure S 1.53: HPLC chromatogramm of SN047.

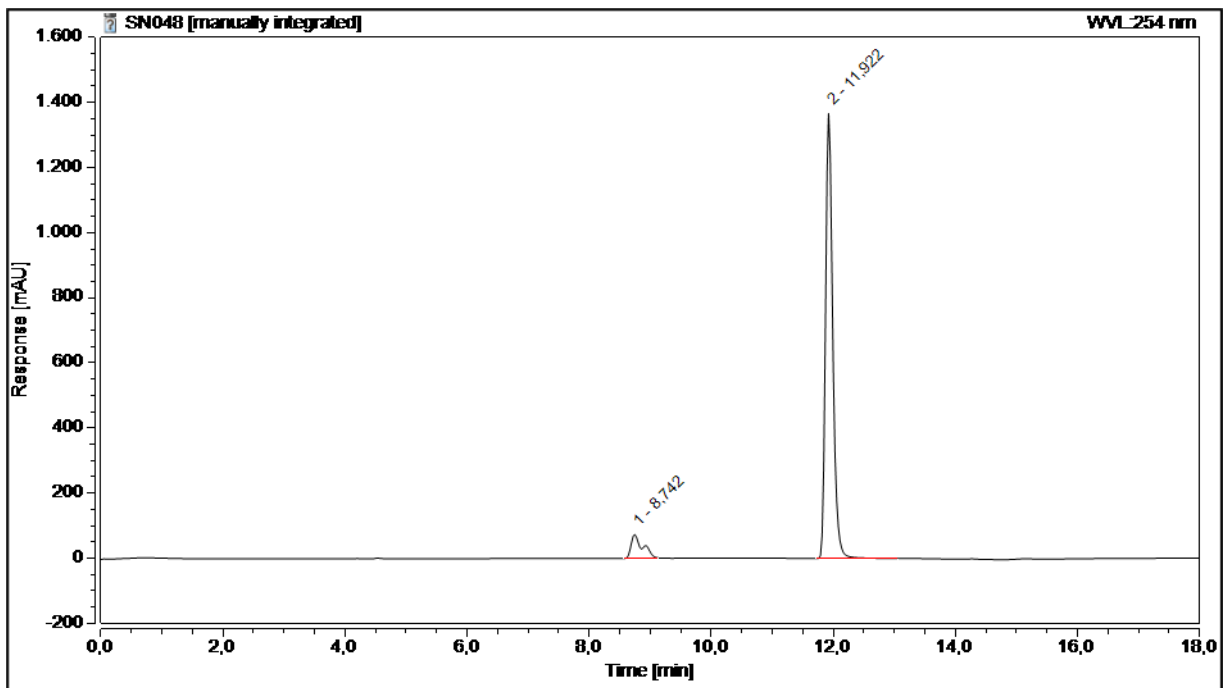

Figure S 1.54: HPLC chromatogramm of SN048.

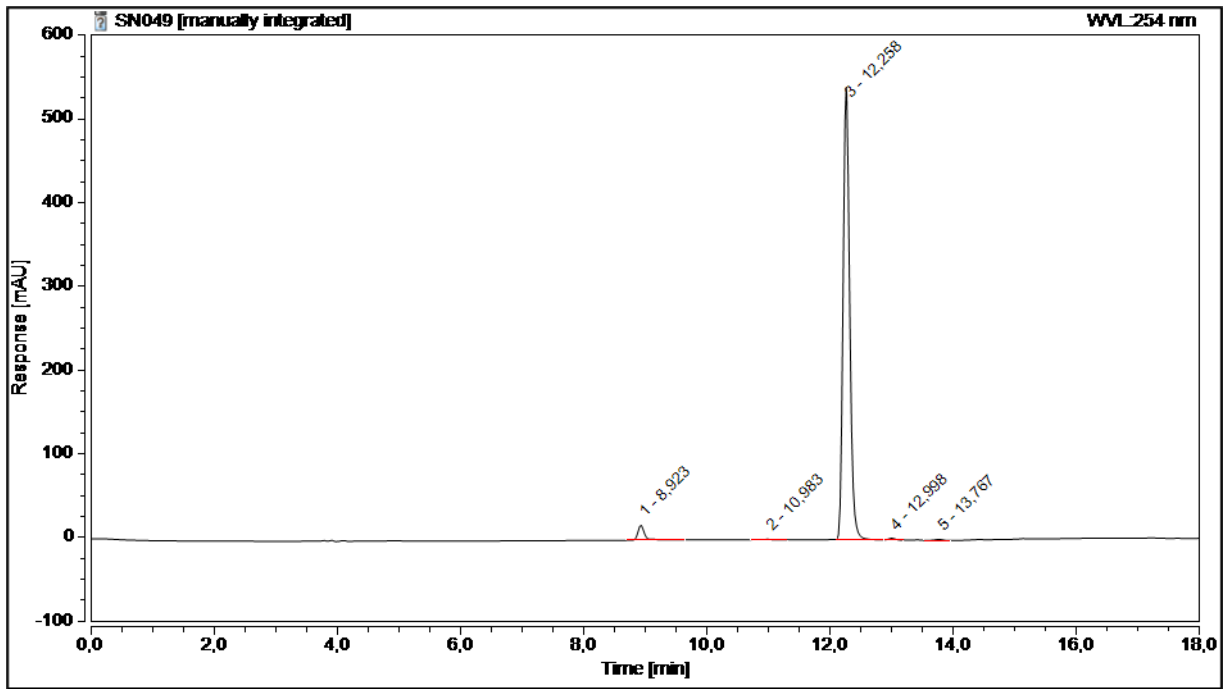

Figure S 1.55: HPLC chromatogramm of SN049.

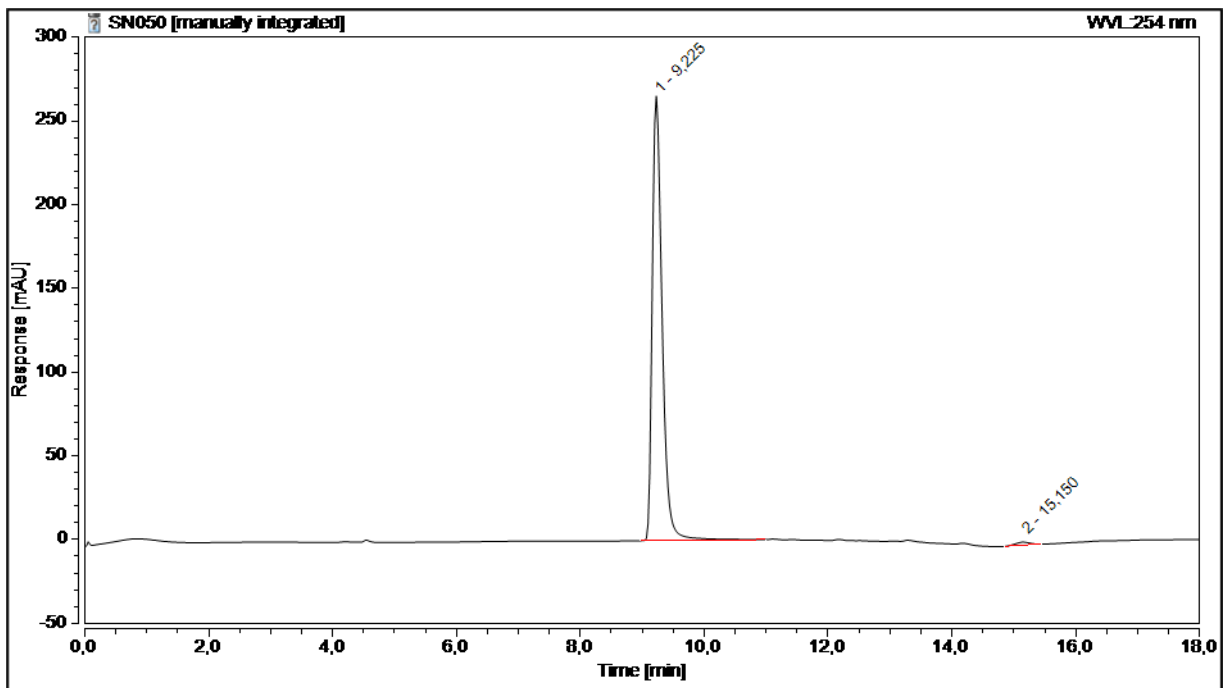

Figure S 1.56: HPLC chromatogramm of SN050.

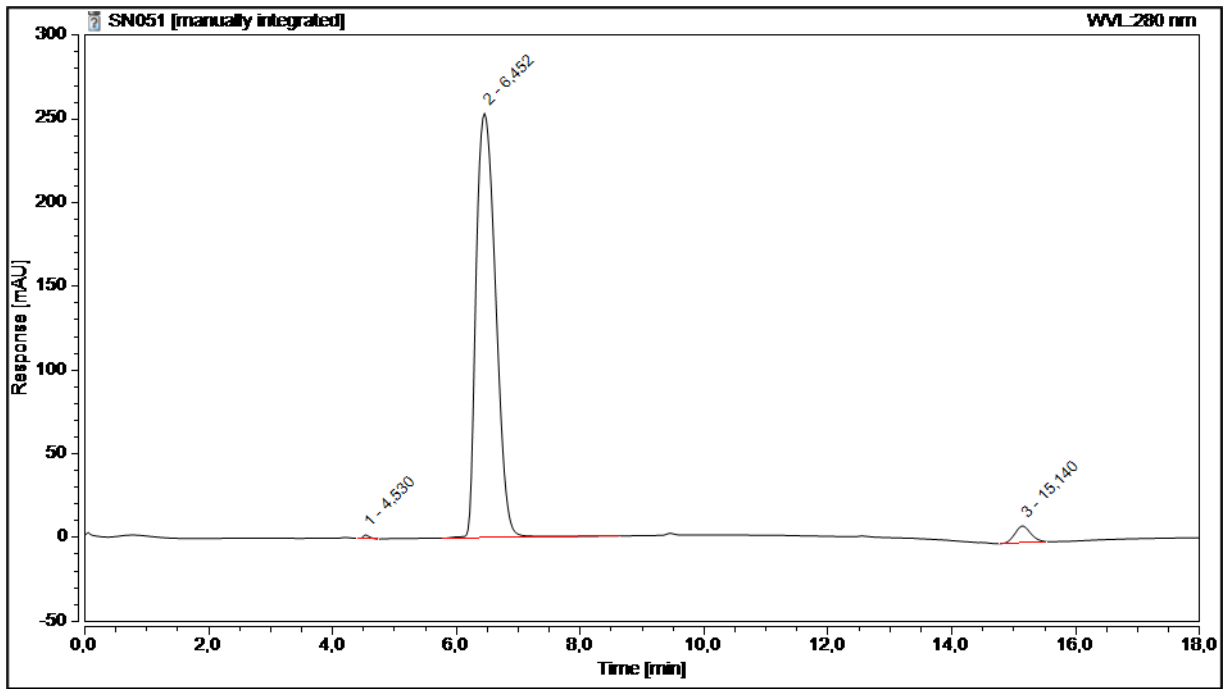

Figure S 1.57: HPLC chromatogramm of SN051.

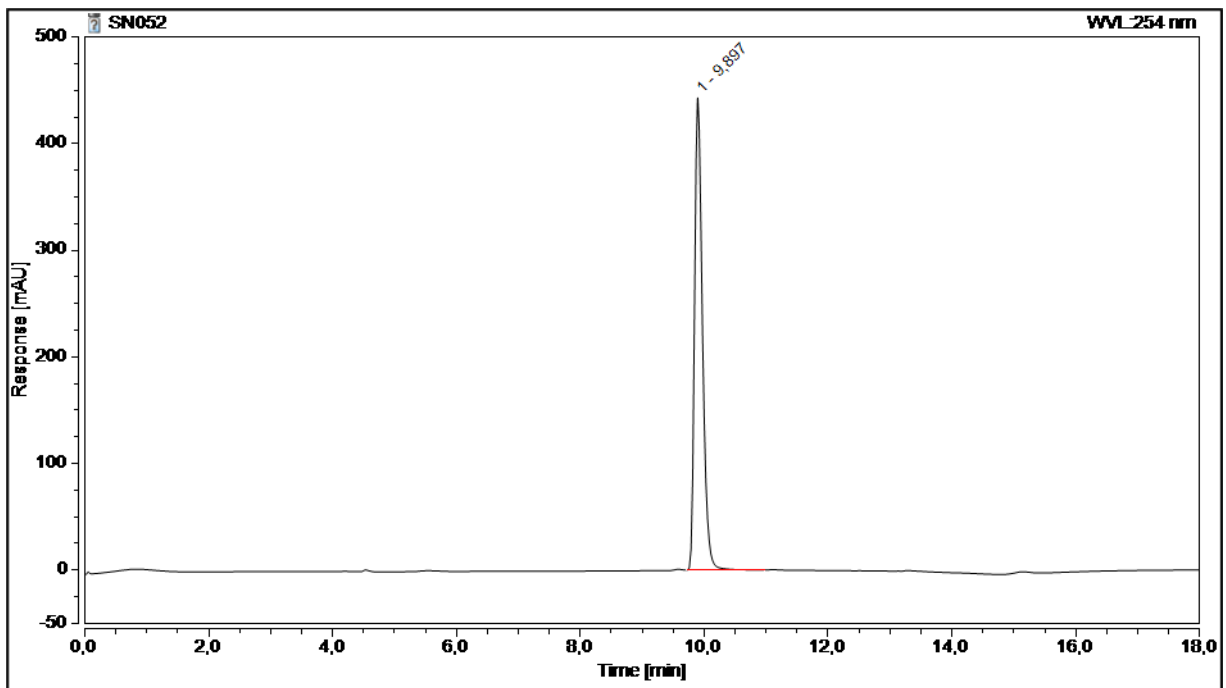

Figure S 1.58: HPLC chromatogramm of SN052.

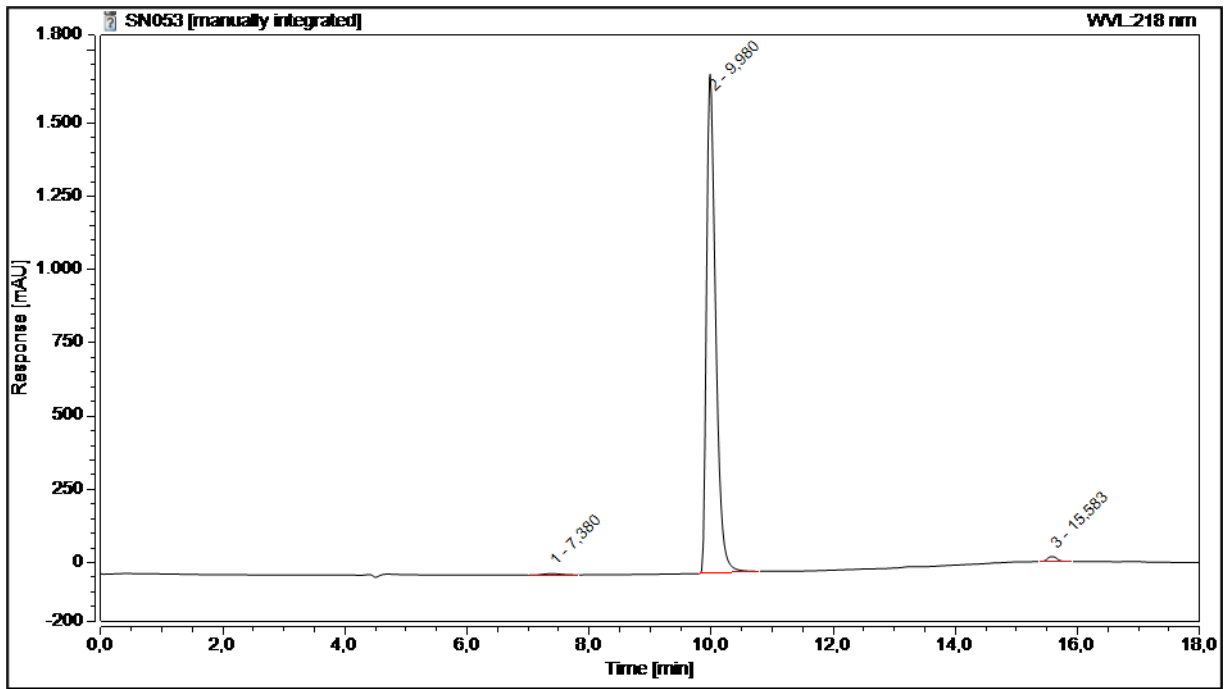

Figure S 1.59: HPLC chromatogramm of SN053.

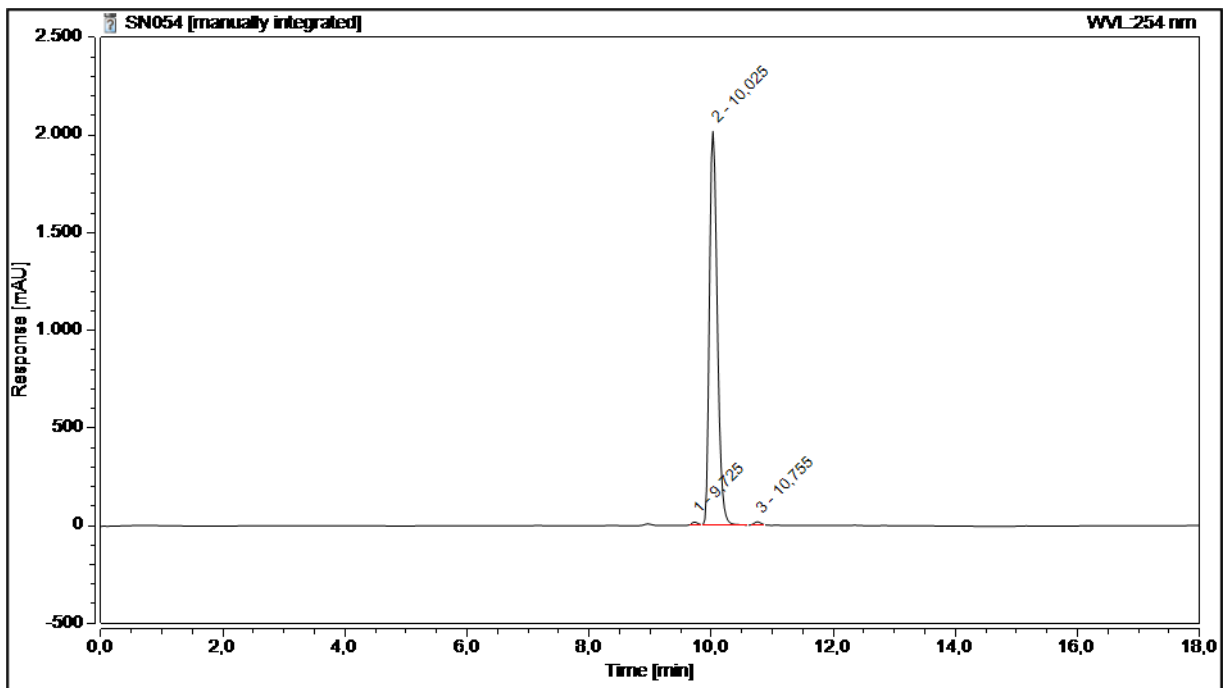

Figure S 1.60: HPLC chromatogramm of SN054.

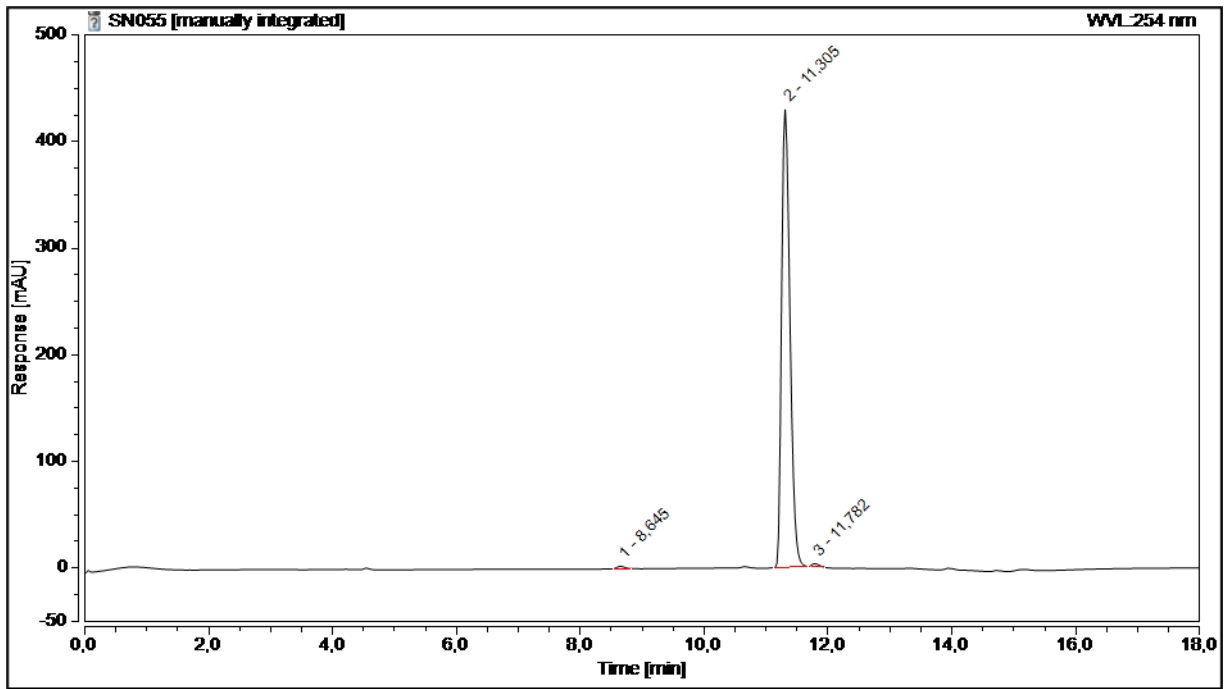

Figure S 1.61: HPLC chromatogramm of SN055.

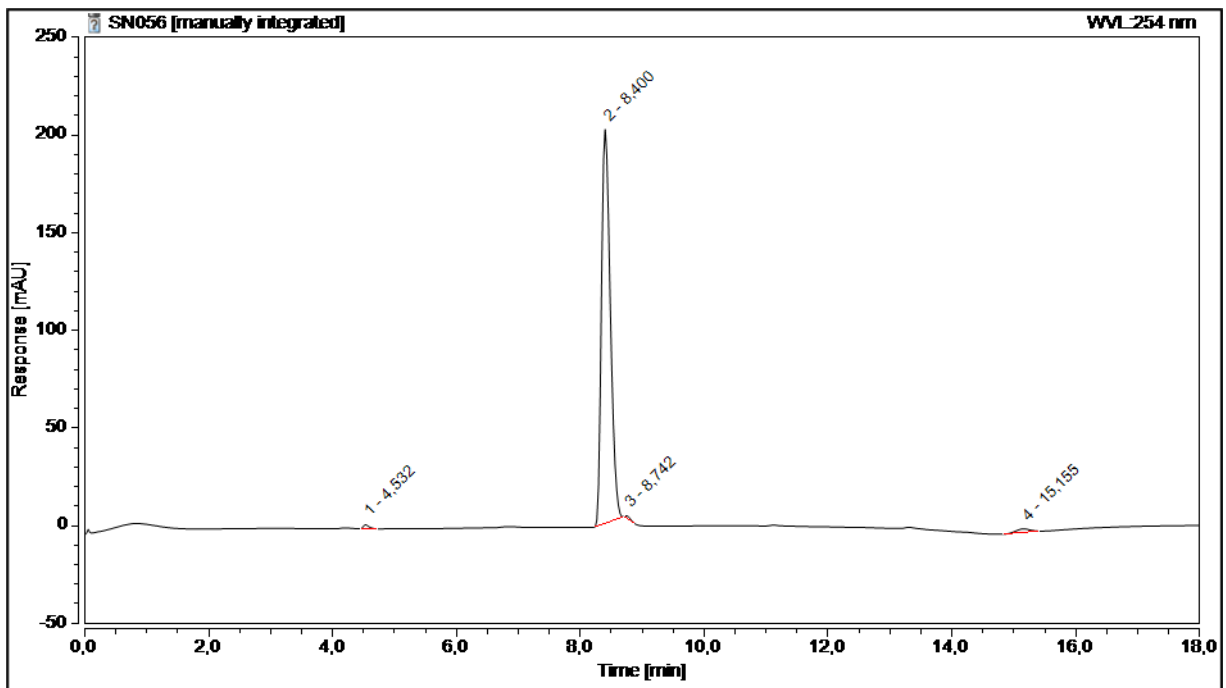

Figure S 1.62: HPLC chromatogramm of SN056.

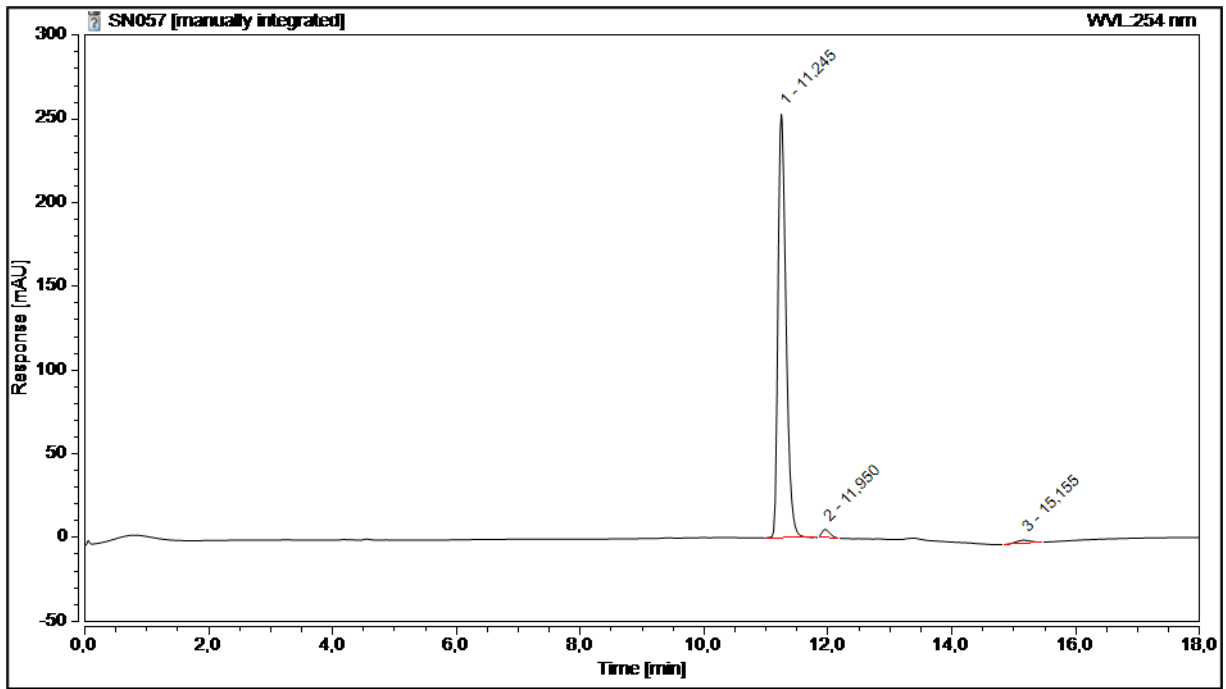

Figure S 1.63: HPLC chromatogramm of SN057.

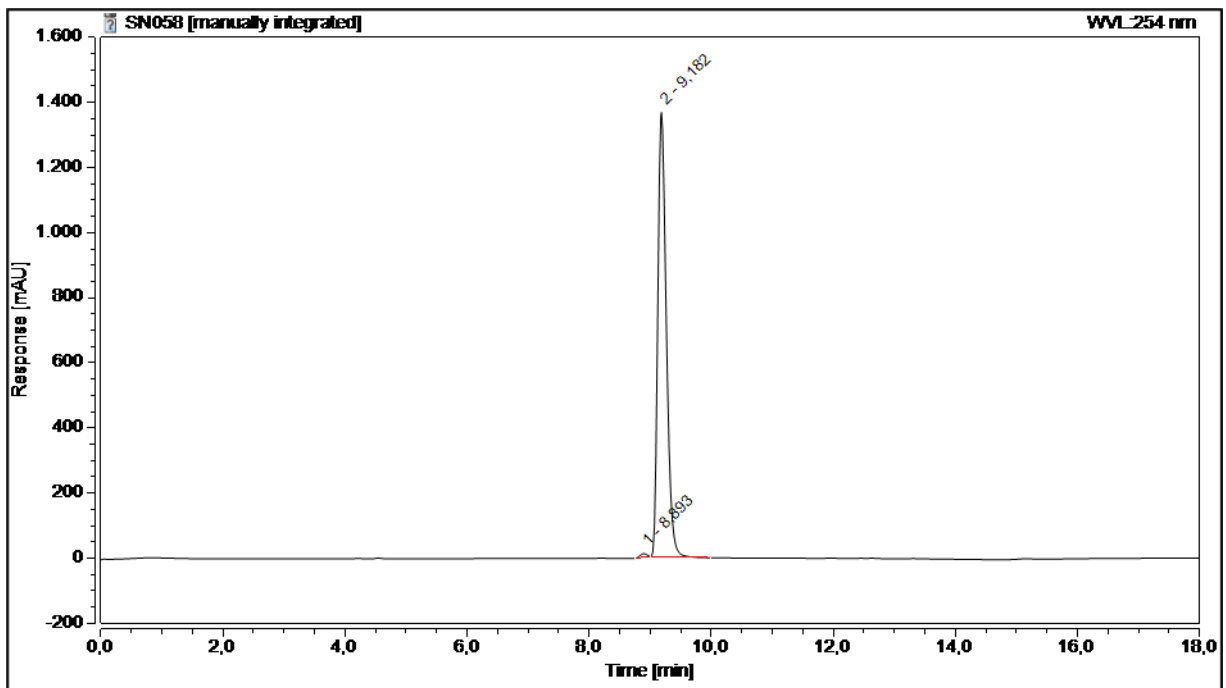

Figure S 1.64: HPLC chromatogramm of SN058.

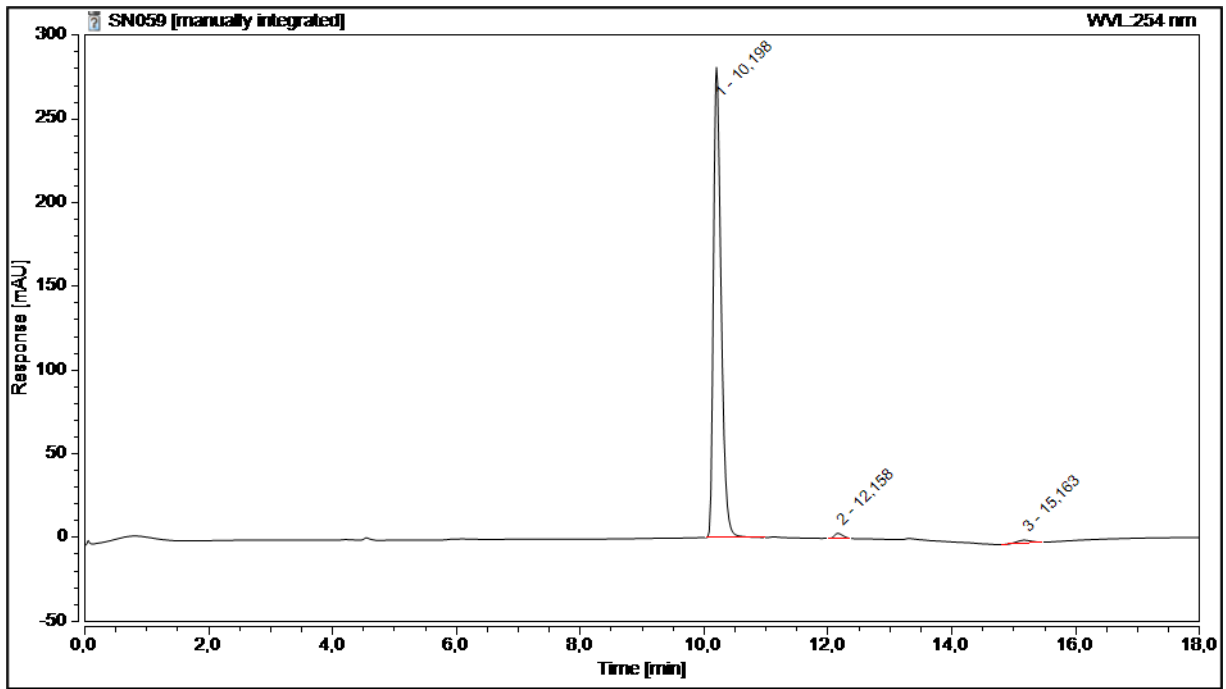

Figure S 1.65: HPLC chromatogramm of SN059.

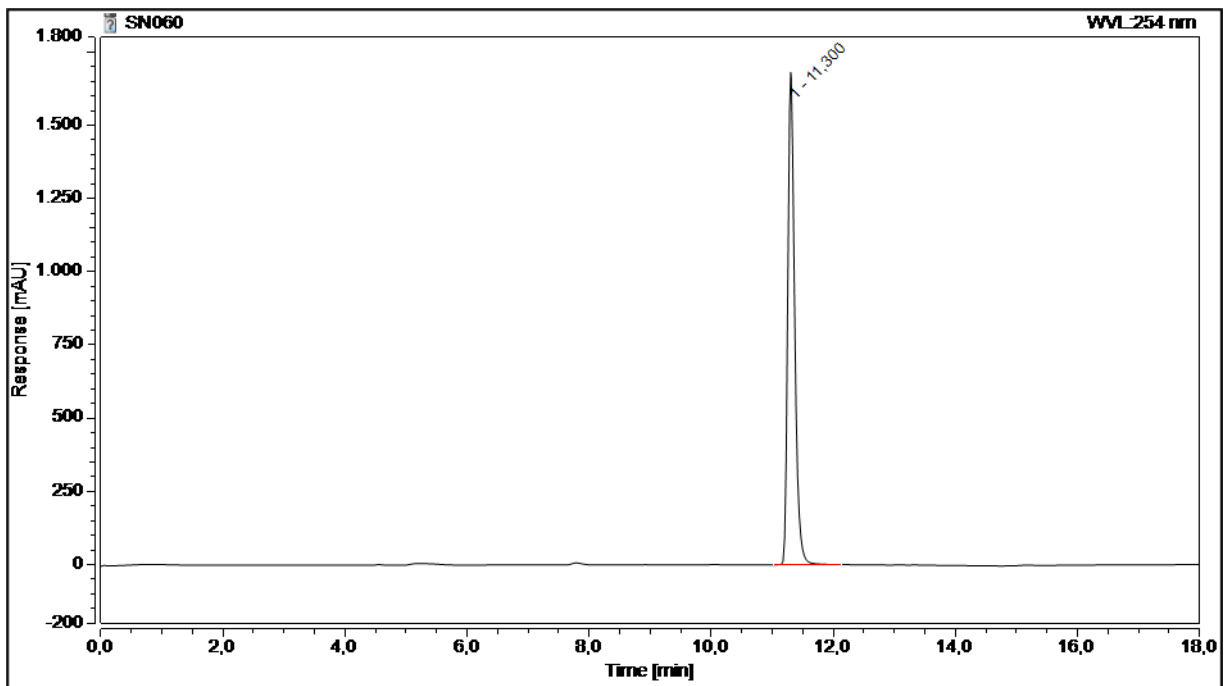

Figure S 1.66: HPLC chromatogramm of SN060.

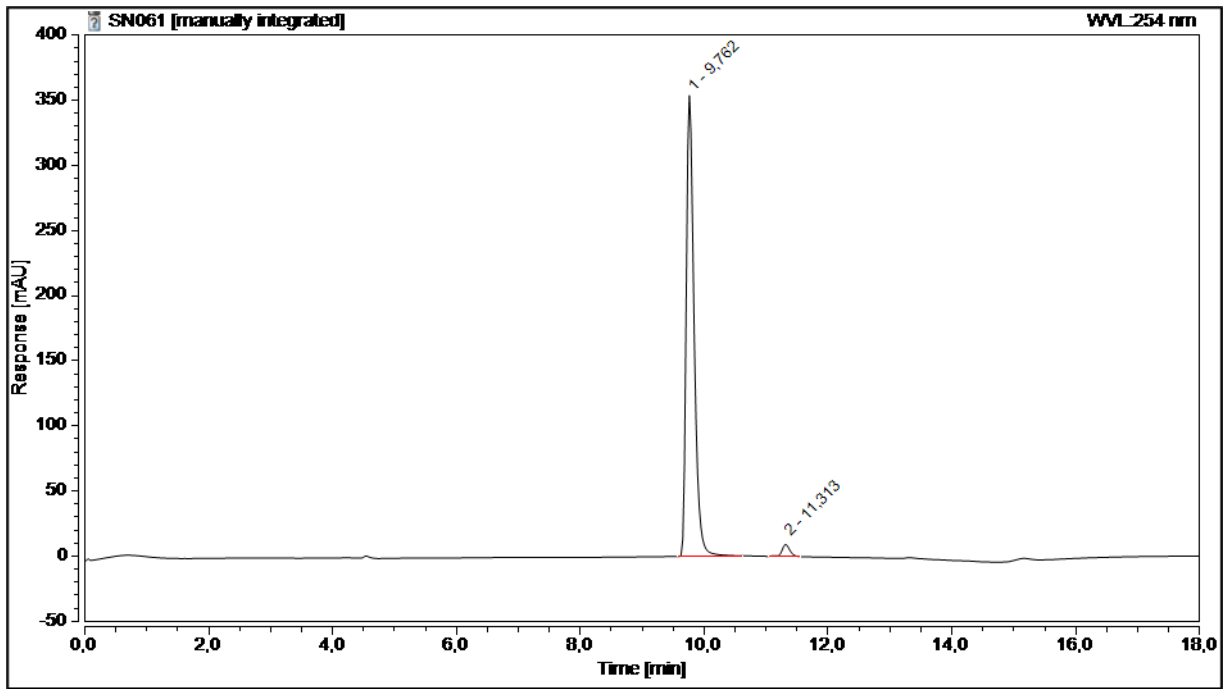

Figure S 1.67: HPLC chromatogramm of SN061.

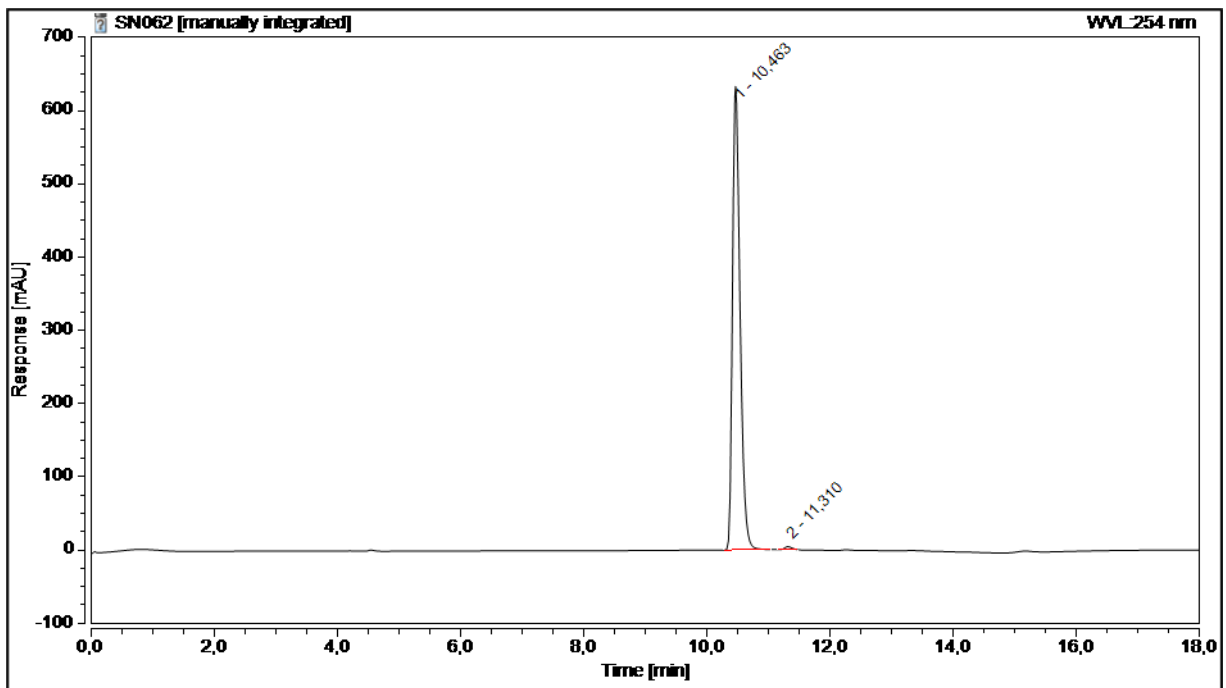

Figure S 1.68: HPLC chromatogramm of SN062.

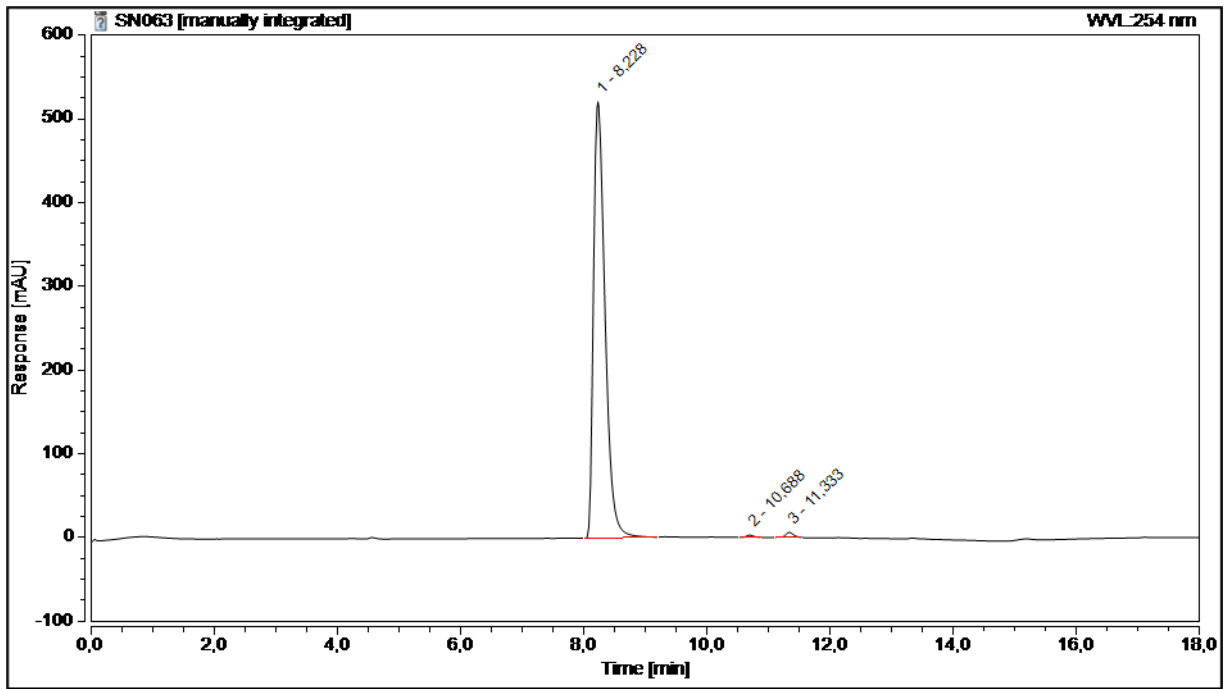

Figure S 1.69: HPLC chromatogramm of SN063.

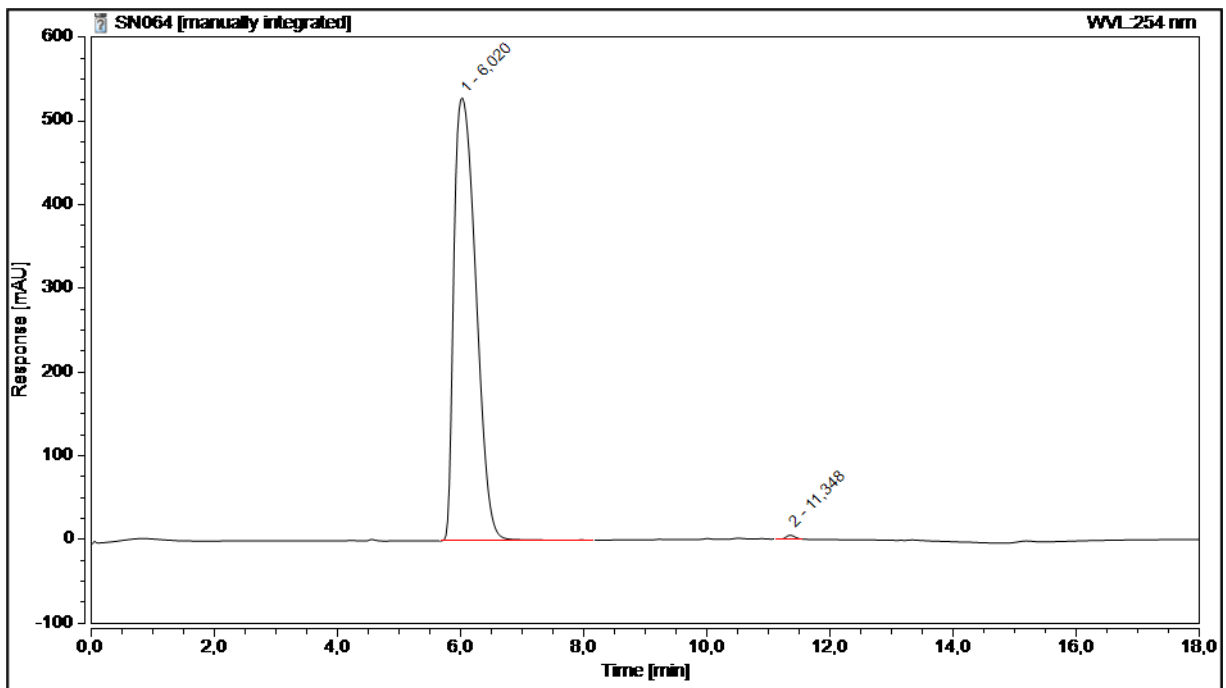

Figure S 1.70: HPLC chromatogramm of SN064.

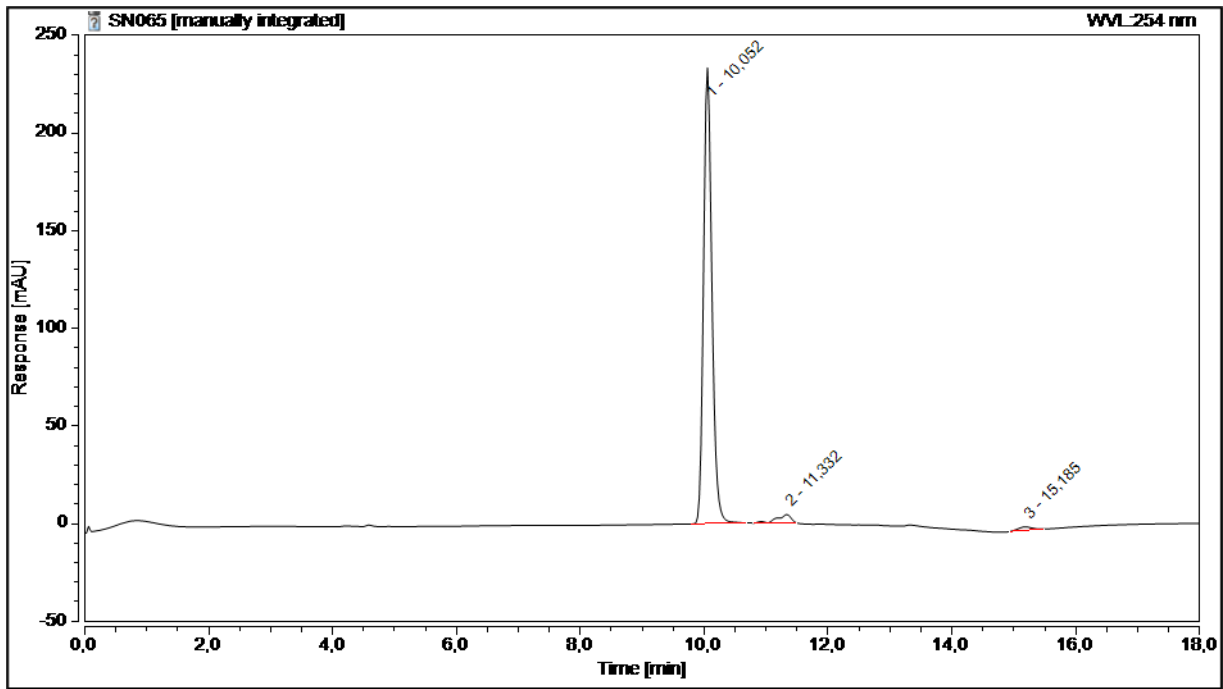

Figure S 1.71: HPLC chromatogramm of SN065.

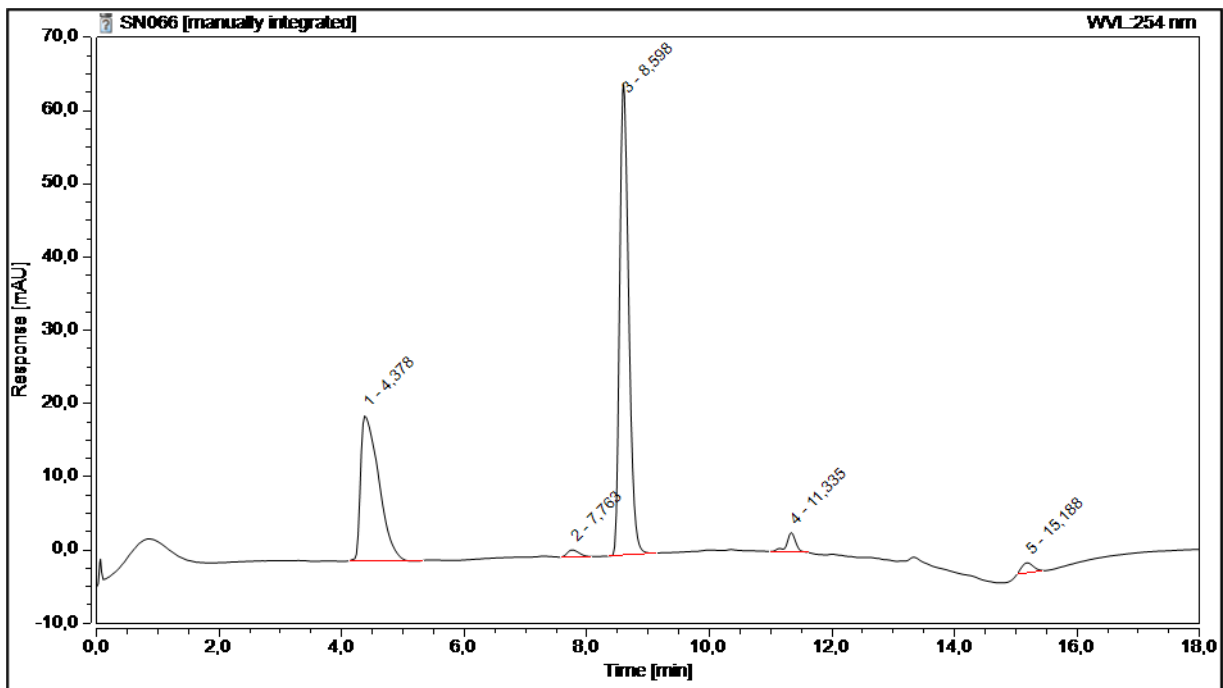

Figure S 1.72: HPLC chromatogramm of SN066.

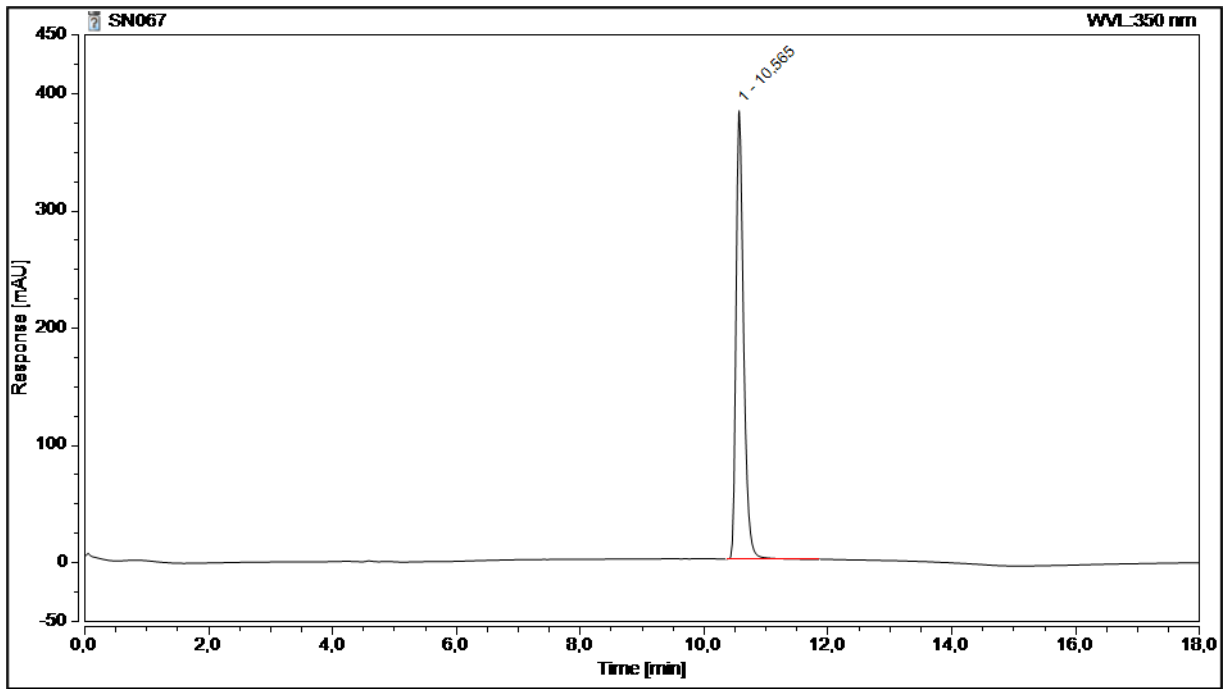

Figure S 1.73: HPLC chromatogramm of SN067.

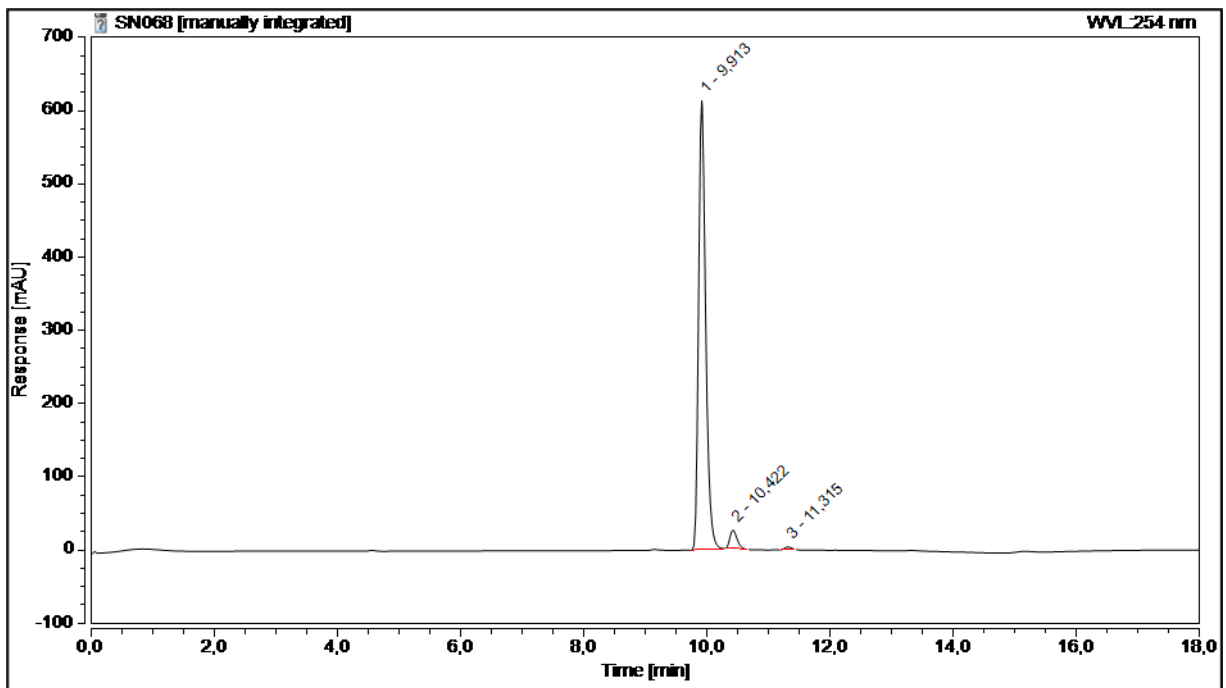

Figure S 1.74: HPLC chromatogramm of SN068.

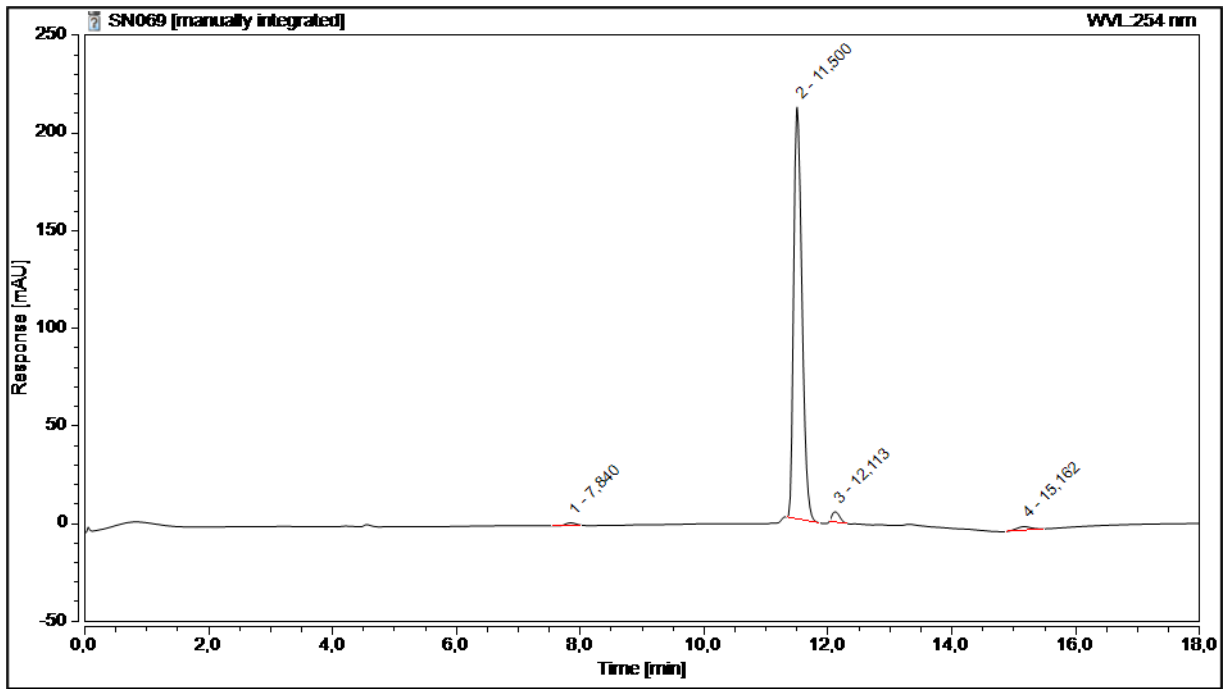

Figure S 1.75: HPLC chromatogramm of SN069.

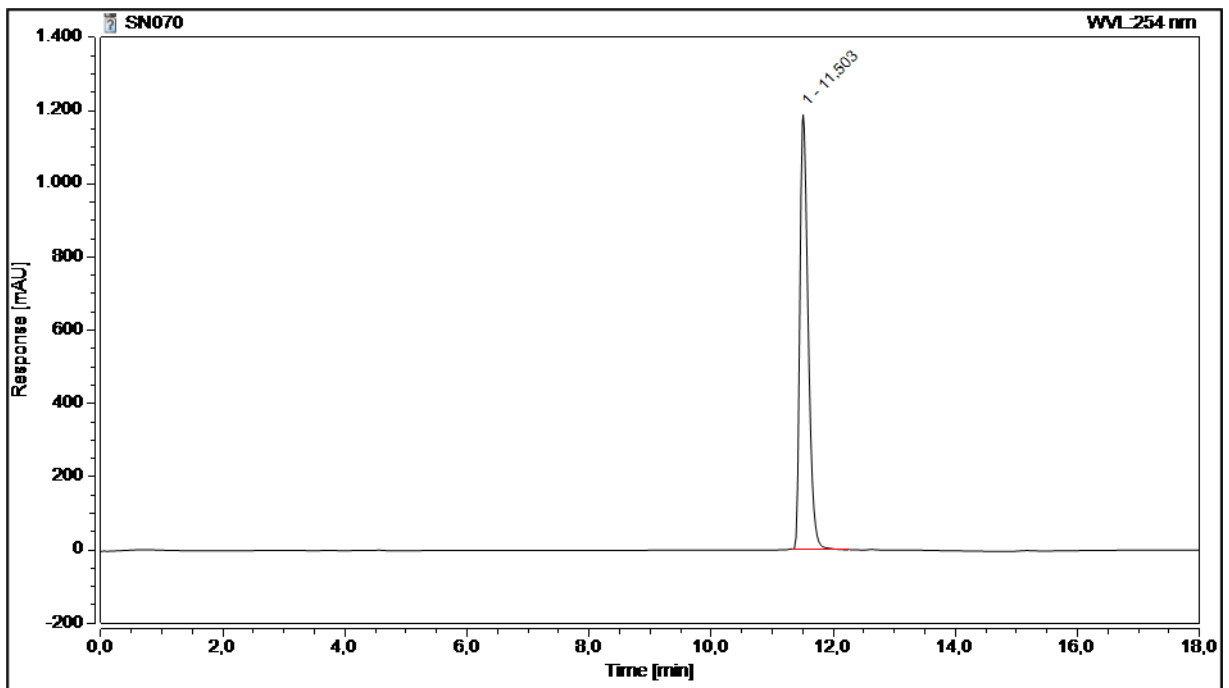

Figure S 1.76: HPLC chromatogramm of SN070.

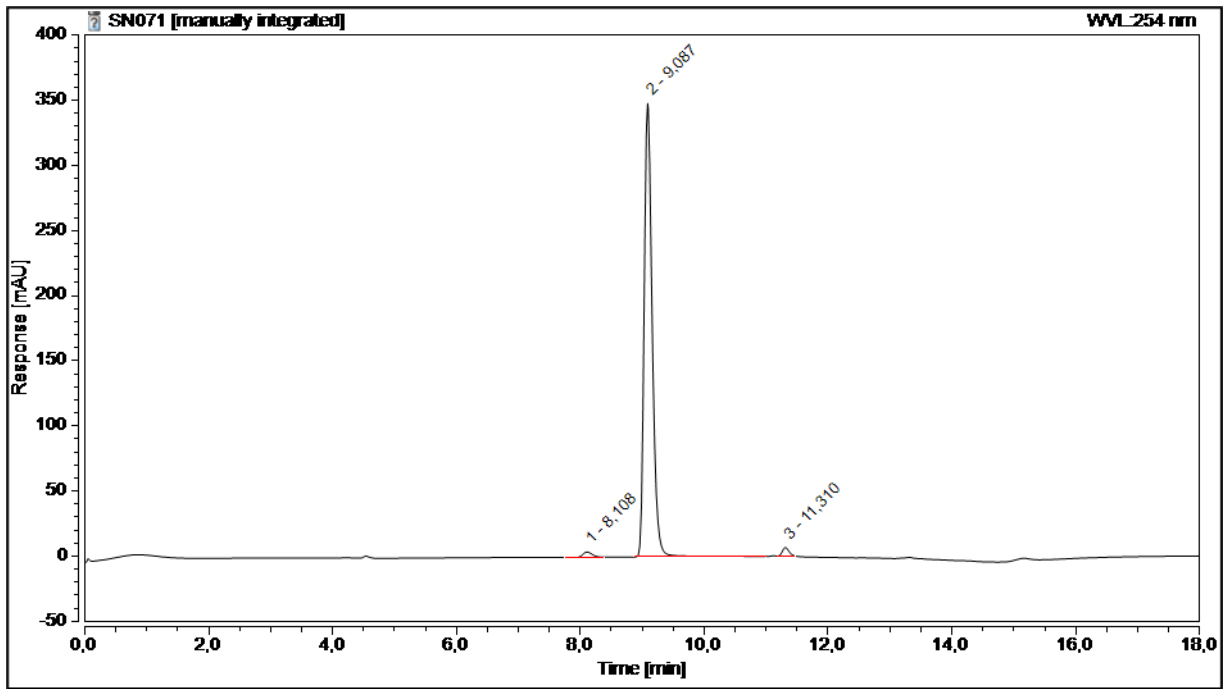

Figure S 1.77: HPLC chromatogramm of SN071.

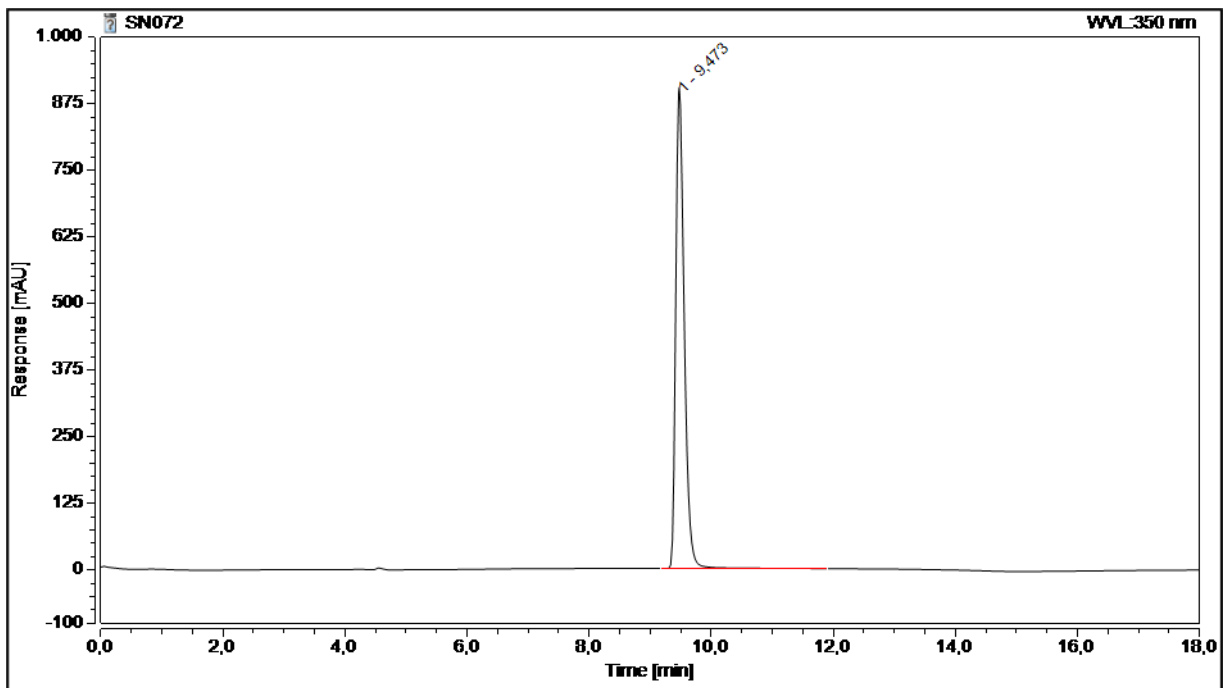

Figure S 1.78: HPLC chromatogramm of SN072.

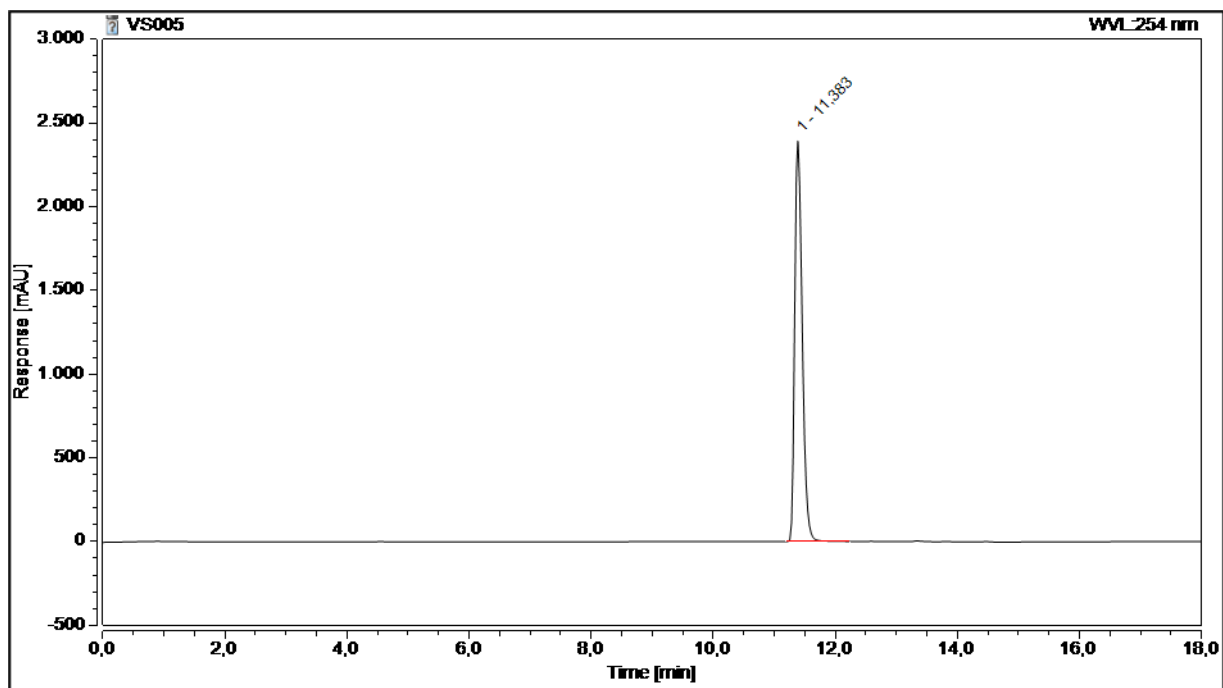

Figure S 1.79: HPLC chromatogram of VS005.

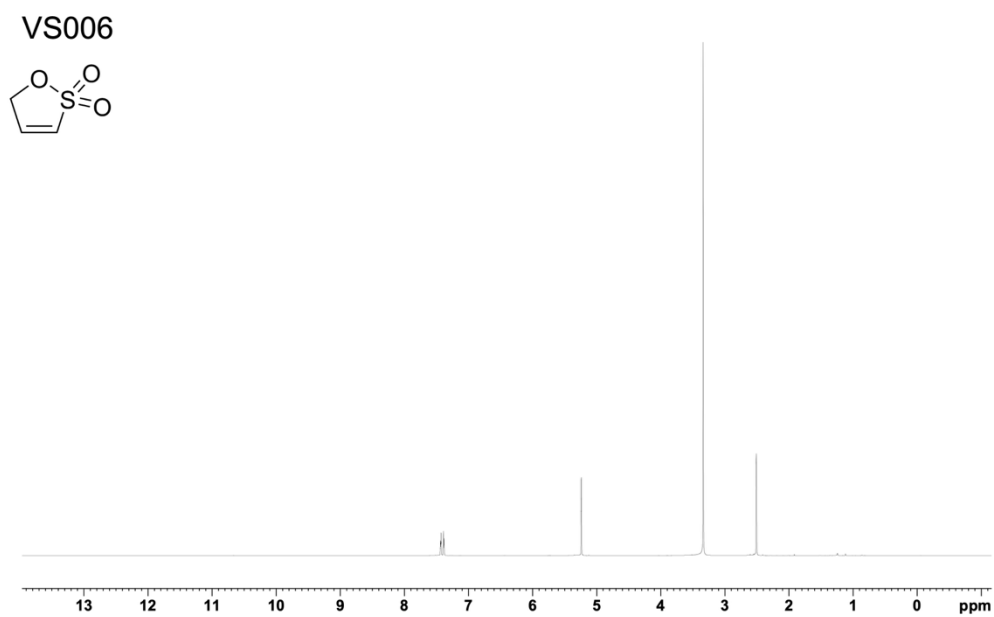

Figure S 1.80:  $^1\text{H-NMR}$  spectrum of VS006 in  $\text{DMSO-d}_6$ .  $\delta=7.44\text{--}7.42$  (m, 1H), 7.38 (d,  $J=6.7$  Hz, 1H) 5.24 ppm (s, 2H) 3.34 (s, water residual), 2.51 (m, DMSO residual).

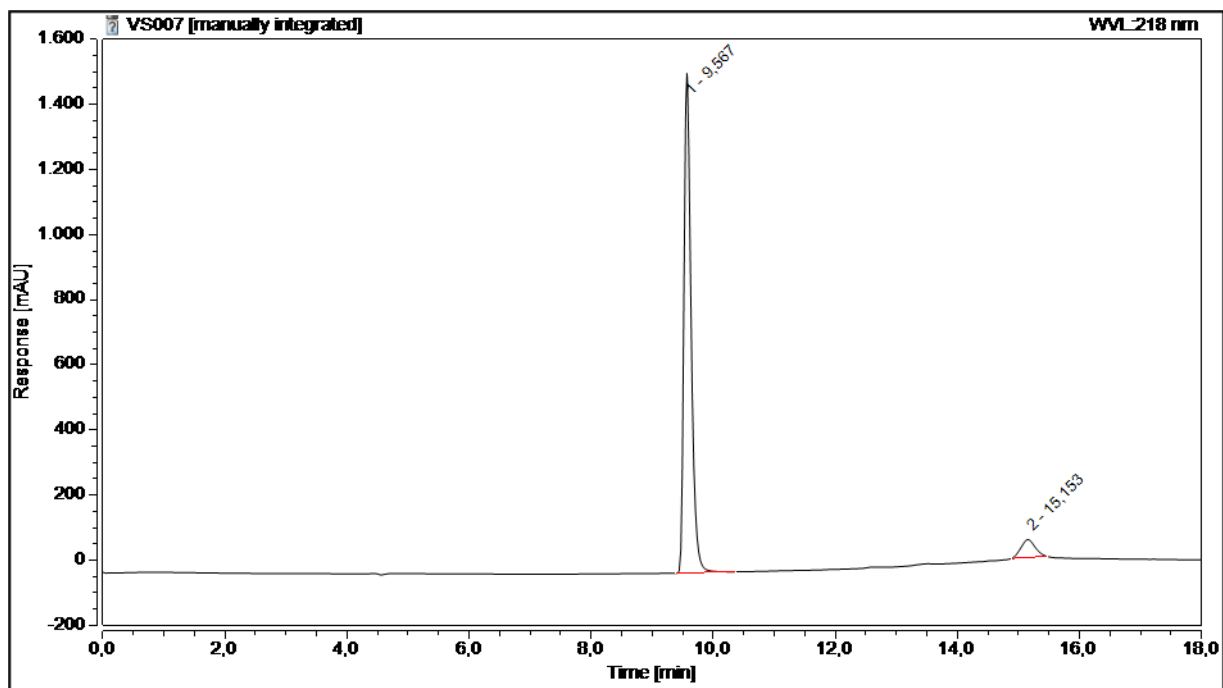

Figure S 1.81: HPLC chromatogram of VS007.

## 2 Calculated Molecular Properties

Table S 2.1: SMILES codes of the investigated compounds including CovLib Generation 1

| Library     | Name  | SMILES                                                                   |
|-------------|-------|--------------------------------------------------------------------------|
| CovLib Gen2 | AA001 | <chem>BrC1=CNC(=O)C(=C)N1</chem>                                         |
| CovLib Gen2 | AA002 | <chem>N1C(CC(CC1(C)C)NC(=O)C(=C)C)(C)C</chem>                            |
| CovLib Gen2 | AA003 | <chem>N(c1cc(ccc1)N)C(=O)C=C</chem>                                      |
| CovLib Gen2 | AA004 | <chem>[S]1(=O)(=O)N([C@@H]2[C@]3(C1)C([C@H](C2)CC3)(C)C)C(=O)C=C</chem>  |
| CovLib Gen2 | AA005 | <chem>N1c2c(cccc2)NC(=C)C1=O</chem>                                      |
| CovLib Gen2 | AA006 | <chem>N(c1ccc(cc1)O)C(=O)C(=C)C</chem>                                   |
| CovLib Gen2 | AA007 | <chem>[N+](=O)([O-])c1cc(ccc1)NC(=O)C=C</chem>                           |
| CovLib Gen2 | AA008 | <chem>N(c1cc(cc(c1)C(=O)O)C(=O)O)C(=O)C(=C)C</chem>                      |
| CovLib Gen1 | CA001 | <chem>[N-]1C(=O)CC(=C(C1=O)C#N)C</chem>                                  |
| CovLib Gen1 | CA002 | <chem>N1(C(=O)CC(=C(C1=O)C#N)C)CCCN(C)C</chem>                           |
| CovLib Gen1 | CA003 | <chem>N1(C(=O)CC(=C(C1=O)C#N)C)CC(O)C</chem>                             |
| CovLib Gen1 | CA004 | <chem>N#C\C(=C(/C1CC1)\C)\C(=O)OC</chem>                                 |
| CovLib Gen1 | CA005 | <chem>N2(CCOCC2)CCNC(=O)\C(=C\C=C\c1cccc1)\C#N</chem>                    |
| CovLib Gen2 | CA006 | <chem>[s]1cc(cc1)\C=C(/C(=O)N)\C#N</chem>                                |
| CovLib Gen2 | CA007 | <chem>[N+](=O)([O-])c1c(c(cc(c1)\C=C(\C(=O)N(CC)CC)/C#N)O)O</chem>       |
| CovLib Gen2 | CA008 | <chem>Nc1ccc(cc1)\C=C(/C(=O)N)\C#N</chem>                                |
| CovLib Gen1 | EO001 | <chem>Fc1c(cccc1[C@@]3(O[C@@H]3C)C[n]2nnc2)F</chem>                      |
| CovLib Gen1 | EO002 | <chem>Fc1c(ccc(c1)F)C3(OC3)C[n]2ncnc2</chem>                             |
| CovLib Gen1 | EO003 | <chem>N3(C=C(C(=O)NC3=O)C)[C@@H]1O[C@@H]([C@@H]2O[C@@H]21)CO</chem>      |
| CovLib Gen2 | EO004 | <chem>N#CC1OC21CCCC2</chem>                                              |
| CovLib Gen2 | EO005 | <chem>O1C(C1)COc2c(cccc2)OC</chem>                                       |
| CovLib Gen2 | EO006 | <chem>O1C2(C1C(=O)OCC)CCC2</chem>                                        |
| CovLib Gen2 | EO007 | <chem>O1C(C1c2ccccc2)CO</chem>                                           |
| CovLib Gen2 | EO008 | <chem>[S](=O)(=O)(OC[C@H]2OC2)c1cc(ccc1)[N+](=O)[O-]</chem>              |
| CovLib Gen2 | EO009 | <chem>N1(C[C@H]2O[C@H]2CC1)C(=O)OC(C)(C)C</chem>                         |
| CovLib Gen2 | EO010 | <chem>O1C(C1C(=O)OC)c2c(cccc2)OC</chem>                                  |
| CovLib Gen1 | SN001 | <chem>Fc1nc(c(cc1F)C#N)F</chem>                                          |
| CovLib Gen1 | SN002 | <chem>Brc1[n](nc(n1)[N+](=O)[O-])CC#N</chem>                             |
| CovLib Gen1 | SN003 | <chem>[S](=O)(=O)(CC)c1[n](c(nn1)c2ccc(cc2)[N+](=O)[O-])C</chem>         |
| CovLib Gen1 | SN004 | <chem>Brc1[n](nc(n1)[N+](=O)[O-])CCC(C)C</chem>                          |
| CovLib Gen1 | SN005 | <chem>Clc1n[n](cn1)c2ncccc2C#N</chem>                                    |
| CovLib Gen1 | SN006 | <chem>Clc1nc(c(nc1C#N)C#N)N</chem>                                       |
| CovLib Gen1 | SN007 | <chem>Brc1nc(c(nc1C#N)C#N)N</chem>                                       |
| CovLib Gen1 | SN008 | <chem>FC(F)[n]1ncc(c1C)[S](=O)(=O)NCCC[n]2nc(c(c2)Cl)[N+](=O)[O-]</chem> |
| CovLib Gen1 | SN009 | <chem>N#CC1=CN=C(Cl)N=C1</chem>                                          |
| CovLib Gen1 | SN010 | <chem>N#CC1=CN=C(Cl)N=C1N</chem>                                         |
| CovLib Gen1 | SN011 | <chem>N#CC1=NN=C(Cl)C=C1</chem>                                          |
| CovLib Gen1 | SN012 | <chem>N#CC1=NN=C(Cl)C(C)=C1</chem>                                       |
| CovLib Gen2 | SN013 | <chem>Clc1ncc(cc1)C(=O)N2CCOCC2</chem>                                   |
| CovLib Gen2 | SN014 | <chem>lc1cnc(nc1)Cl</chem>                                               |
| CovLib Gen2 | SN015 | <chem>Clc1nc(ccc1C(=O)N)Cl</chem>                                        |
| CovLib Gen2 | SN016 | <chem>Clc1nc(c(cc1)[N+](=O)[O-])OC</chem>                                |
| CovLib Gen2 | SN017 | <chem>Clc1ncc(cc1[N+](=O)[O-])C(=O)OC</chem>                             |
| CovLib Gen2 | SN018 | <chem>Brc1nnc(nc1)N</chem>                                               |
| CovLib Gen2 | SN019 | <chem>Clc1nc2c(c(n1)Cl)COC2</chem>                                       |
| CovLib Gen2 | SN020 | <chem>Clc1[nH]c(cn1)[N+](=O)[O-]</chem>                                  |
| CovLib Gen2 | SN021 | <chem>[S](=O)(=O)(C)c1nc2c(cn1)CN(CC2)C(=O)OC(C)(C)C</chem>              |
| CovLib Gen2 | SN022 | <chem>BrC1=NC(=C[n]2ncnc21)Br</chem>                                     |
| CovLib Gen2 | SN023 | <chem>[S](=O)(=O)(CC)c1ncc(cc1)[N+](=O)[O-]</chem>                       |
| CovLib Gen2 | SN024 | <chem>Clc1nc([n+](c(c1)N)[O-])N</chem>                                   |
| CovLib Gen2 | SN025 | <chem>Brc1[nH]c(c(n1)C#N)C#N</chem>                                      |
| CovLib Gen2 | SN026 | <chem>lc1nc([nH]c1[N+](=O)[O-])C</chem>                                  |
| CovLib Gen2 | SN027 | <chem>Brc1nc(c(cc1)O)[N+](=O)[O-]</chem>                                 |
| CovLib Gen2 | SN028 | <chem>Clc1nc2c(c(n1)Cl)CNCC2.Cl</chem>                                   |
| CovLib Gen2 | SN029 | <chem>Clc1nnc(cc1)C(C(=O)OCC)C#N</chem>                                  |

|             |       |                                              |
|-------------|-------|----------------------------------------------|
| CovLib Gen2 | SN030 | Brc1cnc(c(c1)[N+](=O)[O-])C#N                |
| CovLib Gen2 | SN031 | lc1c[n](nc1)c2ncnc(c2)Cl                     |
| CovLib Gen2 | SN032 | lc1c[n](nc1)c2nnc(cc2)Cl                     |
| CovLib Gen2 | SN033 | Clc1nnc(cc1)[n]2nc(cc2C)C                    |
| CovLib Gen2 | SN034 | Clc1cc(ncc1)C(=O)N(OC)C                      |
| CovLib Gen2 | SN035 | Clc1nc(ccc1[N+](=O)[O-])C                    |
| CovLib Gen2 | SN036 | FC(F)(F)C(=O)Nc1nc2[n](c1)N=C(C=C2)Cl        |
| CovLib Gen2 | SN037 | Clc1nc2nc[nH]c2c(n1)Cl                       |
| CovLib Gen2 | SN038 | [S](=O)(=O)(C)c1nc(cc(n1)Cl)Cl               |
| CovLib Gen2 | SN039 | Clc1nc(ncc1C(=O)OCC)C                        |
| CovLib Gen2 | SN040 | S(C)c1nc(c(cn1)Br)C(=O)OC                    |
| CovLib Gen2 | SN041 | Clc1nc(cnc1)[n]2nccc2                        |
| CovLib Gen2 | SN042 | Clc1ncc(nc1)C(=O)OC                          |
| CovLib Gen2 | SN043 | Clc1ncc[n+](c1)[O-]                          |
| CovLib Gen2 | SN044 | Clc1ncnc2[nH]cc(c21)C#N                      |
| CovLib Gen2 | SN045 | Clc1cnc(c(c1)[N+](=O)[O-])C#N                |
| CovLib Gen2 | SN046 | C1C1=Nc2[n](ncc2C#N)C=C1                     |
| CovLib Gen2 | SN047 | Fc1c[n+](c(cc1)Br)[O-]                       |
| CovLib Gen2 | SN048 | Clc1nc(c(cn1)[N+](=O)[O-])NC(C)C             |
| CovLib Gen2 | SN049 | S1Cc2ncnc(c2C1)Cl                            |
| CovLib Gen2 | SN050 | [s]1c(ncc1[N+](=O)[O-])Cl                    |
| CovLib Gen2 | SN051 | Brc1[nH]c(cn1)[N+](=O)[O-]                   |
| CovLib Gen2 | SN052 | Brc1ncccc1[N+](=O)[O-]                       |
| CovLib Gen2 | SN053 | Clc1ncnc2c1ccnc2                             |
| CovLib Gen2 | SN054 | Clc1nc(nc(c1C#N)Cl)N                         |
| CovLib Gen2 | SN055 | Clc1nc(c(cn1)C(=O)OCC)C                      |
| CovLib Gen2 | SN056 | Clc1nnc(cc1)C(=O)OC                          |
| CovLib Gen2 | SN057 | Clc1ncnc2[nH]cc(c21)C(=O)OCC                 |
| CovLib Gen2 | SN058 | [s]1c(nc(c1)C#N)Br                           |
| CovLib Gen2 | SN059 | Clc1ncnc2[nH]ccc21                           |
| CovLib Gen2 | SN060 | Clc1nc(nc(n1)N2CCOCC2)Cl                     |
| CovLib Gen2 | SN061 | Fc1ncc(cc1)C(=O)OC                           |
| CovLib Gen2 | SN062 | Brc1[nH]nc(c1[N+](=O)[O-])Br                 |
| CovLib Gen2 | SN063 | FC(F)(F)c1c[n+](c(cc1)Cl)[O-]                |
| CovLib Gen2 | SN064 | Clc1ncc(cc1C(=O)N)[N+](=O)[O-]               |
| CovLib Gen2 | SN065 | Clc1ncc(cc1Cl)C(=O)N2C(CCC2)C(=O)N           |
| CovLib Gen2 | SN066 | [S]1(=O)(=O)CCc2nc(nc(c21)Cl)Cl              |
| CovLib Gen2 | SN067 | S1c2[n](c(c(n2)Cl)[N+](=O)[O-])C=C1          |
| CovLib Gen2 | SN068 | FC(F)(F)c1cnc(cc1)[S](=O)(=O)CC(=O)OC        |
| CovLib Gen2 | SN069 | FC(F)(F)c1nc(ncc1C(=O)OC)Cl                  |
| CovLib Gen2 | SN070 | Clc1ncnc(c1)[n]2nccc2                        |
| CovLib Gen2 | SN071 | Brc1c([nH]nc1)C#N                            |
| CovLib Gen2 | SN072 | C1C1=N[n]2c(ncc2[N+](=O)[O-])C=C1            |
| CovLib Gen1 | VS001 | [S](=O)(=O)(Cc1[o]ccc1)\C(=C\OCC)\C#N        |
| CovLib Gen1 | VS002 | [S]1(=O)(=O)N(c2c([s]cc2)C(=O)\C\1=C\N(C)C)C |
| CovLib Gen1 | VS003 | Fc1cc2c(cc1)[S](=O)(=O)C=C2C                 |
| CovLib Gen1 | VS004 | [S]1(=O)(=O)c2c(cccc2)C(=C1)Sc3[nH]c(nn3)N   |
| CovLib Gen2 | VS005 | [S](=O)(=O)(N2CCC(CC2)C(=O)O)\C=C1c1cccc1    |
| CovLib Gen2 | VS006 | [S]1(=O)(=O)OCC=C1                           |
| CovLib Gen2 | VS007 | [S](=O)(=O)(c1cccc1)C=C                      |

Table S 2.2: Calculated molecular properties of the investigated fragments

| Name  | Heavy Atoms | Molecular Weight [g/mol] | Hydrogen Bond Acceptors | Hydrogen Bond Donors | Rotatable Bonds | QLogPo/w | Polar Surface Area [Å <sup>2</sup> ] |
|-------|-------------|--------------------------|-------------------------|----------------------|-----------------|----------|--------------------------------------|
| AA001 | 9           | 189.011                  | 3                       | 2                    | 1               | 0.648    | 55.038                               |
| AA002 | 16          | 224.345                  | 3.5                     | 2                    | 2               | 2.23     | 41.271                               |
| AA003 | 12          | 162.191                  | 3.5                     | 2.5                  | 3               | 1.069    | 63.072                               |
| AA004 | 18          | 269.358                  | 5                       | 0                    | 1               | 1.63     | 62.948                               |
| AA005 | 12          | 160.175                  | 3                       | 2                    | 1               | 1.405    | 53.958                               |
| AA006 | 13          | 177.202                  | 3.25                    | 2                    | 3               | 1.646    | 57.36                                |
| AA007 | 14          | 192.174                  | 3.5                     | 1                    | 3               | 1.536    | 81.59                                |
| AA008 | 18          | 249.223                  | 6.5                     | 3                    | 4               | 0.888    | 135.402                              |
| CA006 | 12          | 178.208                  | 4                       | 2                    | 4               | 0.324    | 75.236                               |
| CA007 | 22          | 305.29                   | 7                       | 2                    | 9               | 0.645    | 138.305                              |
| CA008 | 14          | 187.201                  | 5                       | 3.5                  | 5               | -0.262   | 101.6                                |
| EO004 | 10          | 137.181                  | 3.5                     | 0                    | 1               | 0.585    | 39.022                               |
| EO005 | 13          | 180.203                  | 3.5                     | 0                    | 4               | 1.568    | 28.549                               |
| EO006 | 11          | 156.181                  | 4                       | 0                    | 2               | 0.894    | 48.003                               |
| EO007 | 11          | 150.177                  | 2.7                     | 0                    | 2               | 1.401    | 35.273                               |
| EO008 | 17          | 259.233                  | 7                       | 0                    | 5               | -0.265   | 104.296                              |
| EO009 | 14          | 199.249                  | 4.5                     | 0                    | 1               | 1.581    | 45.797                               |
| EO010 | 15          | 208.213                  | 4.75                    | 0                    | 2               | 1.48     | 56.762                               |
| SN013 | 15          | 226.662                  | 5.7                     | 0                    | 1               | 1.046    | 50.496                               |
| SN014 | 8           | 240.431                  | 2                       | 0                    | 0               | 1.741    | 25.23                                |
| SN015 | 11          | 191.016                  | 3.5                     | 2                    | 1               | 0.695    | 64.264                               |
| SN016 | 12          | 188.57                   | 2                       | 0                    | 2               | 1.806    | 61.235                               |
| SN017 | 14          | 216.58                   | 4                       | 0                    | 2               | 0.706    | 94.492                               |
| SN018 | 8           | 174.987                  | 3.5                     | 2                    | 1               | -0.279   | 67.01                                |
| SN019 | 11          | 191.016                  | 3.7                     | 0                    | 0               | 1.193    | 35.169                               |
| SN020 | 9           | 147.521                  | 2.5                     | 1                    | 1               | 0.441    | 74.202                               |
| SN021 | 9           | 147.521                  | 2.5                     | 1                    | 1               | 0.444    | 73.785                               |
| SN022 | 21          | 313.371                  | 8.5                     | 0                    | 2               | 0.91     | 94.949                               |
| SN023 | 11          | 277.906                  | 3.5                     | 0                    | 0               | 1.327    | 45.016                               |
| SN024 | 14          | 216.211                  | 6                       | 0                    | 3               | -0.385   | 94.674                               |
| SN025 | 10          | 160.563                  | 3                       | 4                    | 2               | -0.299   | 85.302                               |
| SN026 | 10          | 196.994                  | 4.5                     | 1                    | 2               | 0.133    | 80.296                               |
| SN027 | 10          | 252.999                  | 2.5                     | 1                    | 1               | 0.906    | 72.549                               |
| SN028 | 10          | 252.999                  | 2.5                     | 1                    | 1               | 0.91     | 72.146                               |
| SN029 | 11          | 218.994                  | 2.75                    | 1                    | 2               | 1.252    | 77.438                               |
| SN030 | 11          | 218.994                  | 2.75                    | 1                    | 2               | 1.249    | 77.477                               |
| SN031 | 12          | 204.058                  | 3.5                     | 1                    | 0               | 1.206    | 40.054                               |
| SN032 | 15          | 225.634                  | 5.5                     | 0                    | 4               | 0.811    | 87.691                               |
| SN033 | 12          | 228.005                  | 3.5                     | 0                    | 2               | 0.393    | 83.16                                |
| SN034 | 13          | 306.493                  | 3                       | 0                    | 0               | 2.442    | 39.976                               |
| SN035 | 13          | 306.493                  | 3                       | 0                    | 0               | 2.395    | 42.876                               |
| SN036 | 14          | 208.65                   | 3                       | 0                    | 0               | 2.151    | 41.505                               |
| SN037 | 13          | 200.624                  | 5.2                     | 0                    | 2               | 1.043    | 49.084                               |
| SN038 | 11          | 172.571                  | 2                       | 0                    | 1               | 1.404    | 57.662                               |
| SN039 | 17          | 264.594                  | 5                       | 1                    | 1               | 1.94     | 68.626                               |
| SN040 | 11          | 189.004                  | 3.5                     | 1                    | 0               | 1.114    | 54.117                               |
| SN041 | 11          | 189.004                  | 3.5                     | 1                    | 0               | 1.117    | 54.115                               |
| SN042 | 12          | 227.065                  | 6                       | 0                    | 1               | 0.348    | 62.232                               |
| SN043 | 13          | 200.624                  | 4                       | 0                    | 2               | 1.431    | 58.127                               |
| SN044 | 13          | 263.108                  | 4                       | 0                    | 2               | 1.782    | 56.285                               |
| SN045 | 12          | 180.596                  | 3.5                     | 0                    | 0               | 1.388    | 40.187                               |
| SN046 | 11          | 172.571                  | 4                       | 0                    | 1               | 0.667    | 61.439                               |
| SN047 | 8           | 130.533                  | 2                       | 0                    | 0               | 0.461    | 37.017                               |
| SN048 | 12          | 178.58                   | 3.5                     | 1                    | 1               | 0.778    | 65.804                               |
| SN049 | 12          | 183.554                  | 3.5                     | 0                    | 2               | 0.388    | 83.164                               |
| SN050 | 12          | 178.58                   | 3.5                     | 0                    | 1               | 1.15     | 57.027                               |
| SN051 | 9           | 191.987                  | 1                       | 0                    | 0               | 2.397    | 23.419                               |
| SN052 | 14          | 216.627                  | 3.5                     | 1                    | 3               | 1.855    | 75.853                               |
| SN053 | 10          | 172.632                  | 2.5                     | 0                    | 0               | 1.58     | 25.528                               |
| SN054 | 9           | 164.566                  | 2.5                     | 0                    | 1               | 0.623    | 59.387                               |
| SN055 | 9           | 191.972                  | 2.5                     | 1                    | 1               | 0.449    | 74.412                               |
| SN056 | 9           | 191.972                  | 2.5                     | 1                    | 1               | 0.452    | 73.989                               |
| SN057 | 10          | 202.995                  | 2                       | 0                    | 1               | 1.313    | 56.843                               |
| SN058 | 11          | 165.582                  | 3.5                     | 0                    | 0               | 0.957    | 38.052                               |
| SN059 | 11          | 189.004                  | 4                       | 2                    | 2               | 0.538    | 76.049                               |
| SN060 | 13          | 200.624                  | 4                       | 0                    | 2               | 1.46     | 57.383                               |
| SN061 | 11          | 172.571                  | 4                       | 0                    | 1               | 0.562    | 64.111                               |
| SN062 | 15          | 225.634                  | 3                       | 0                    | 2               | 2.01     | 73.564                               |
| SN063 | 8           | 189.029                  | 3                       | 0                    | 1               | 0.667    | 39.43                                |
| SN064 | 10          | 153.571                  | 2                       | 1                    | 0               | 1.337    | 40.131                               |
| SN065 | 14          | 235.072                  | 5.2                     | 0                    | 0               | 1.413    | 49.627                               |
| SN066 | 11          | 155.128                  | 3                       | 0                    | 1               | 1.449    | 49.105                               |
| SN067 | 10          | 270.868                  | 2                       | 1                    | 1               | 1.046    | 74.624                               |
| SN068 | 12          | 197.544                  | 1                       | 0                    | 0               | 2.686    | 23.416                               |
| SN069 | 13          | 201.569                  | 4.5                     | 2                    | 2               | -0.013   | 109.457                              |
| SN070 | 18          | 288.133                  | 6.5                     | 2                    | 2               | 0.643    | 91.277                               |
| SN071 | 13          | 239.076                  | 6                       | 0                    | 0               | 0.134    | 64.812                               |
| SN072 | 12          | 203.603                  | 2.5                     | 0                    | 1               | 1.387    | 59.691                               |
| VS005 | 18          | 283.222                  | 7                       | 0                    | 3               | 0.739    | 81.594                               |
| VS006 | 15          | 240.569                  | 4                       | 0                    | 1               | 1.733    | 55.906                               |
| VS007 | 12          | 180.596                  | 3                       | 0                    | 0               | 1.195    | 40.006                               |

### 3 Turbidimetric Solubility Assessment

#### 3.1 Spectra

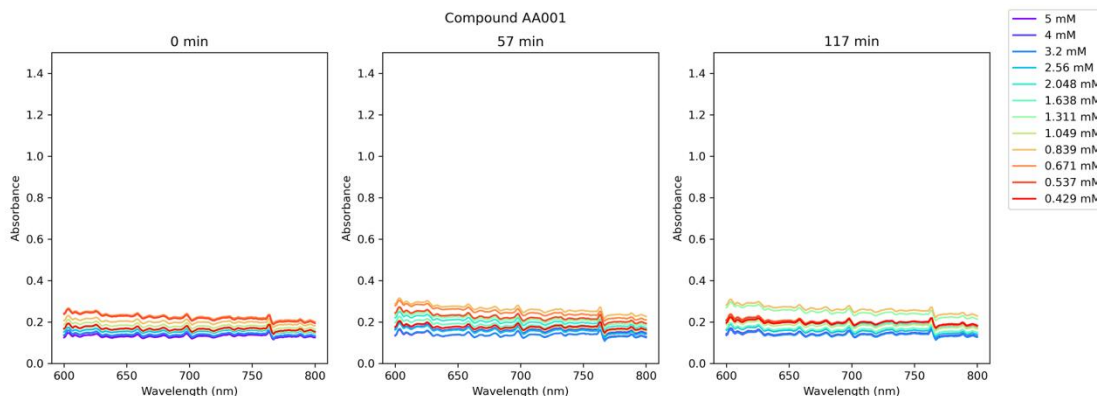

Figure S 3.1: Extinction spectra of the turbidimetric solubility assay after 0, 57, and 117 min for AA001.

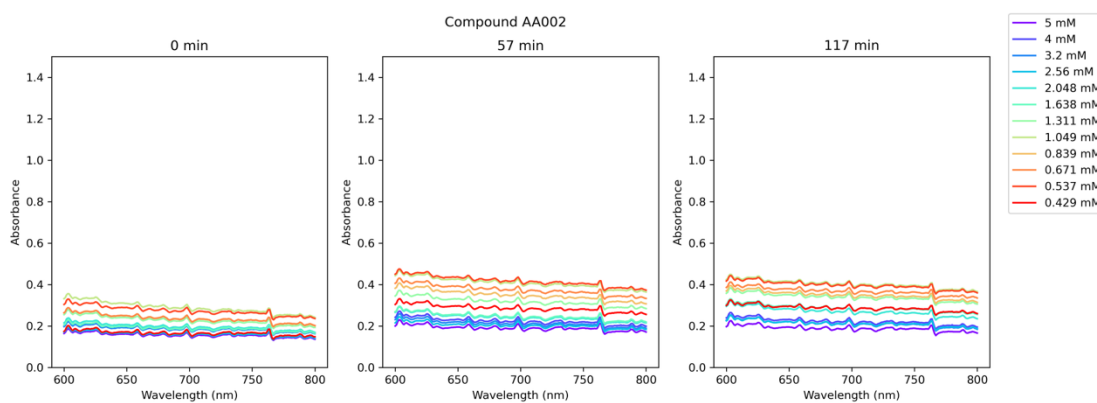

Figure S 3.2: Extinction spectra of the turbidimetric solubility assay after 0, 57, and 117 min for AA002.

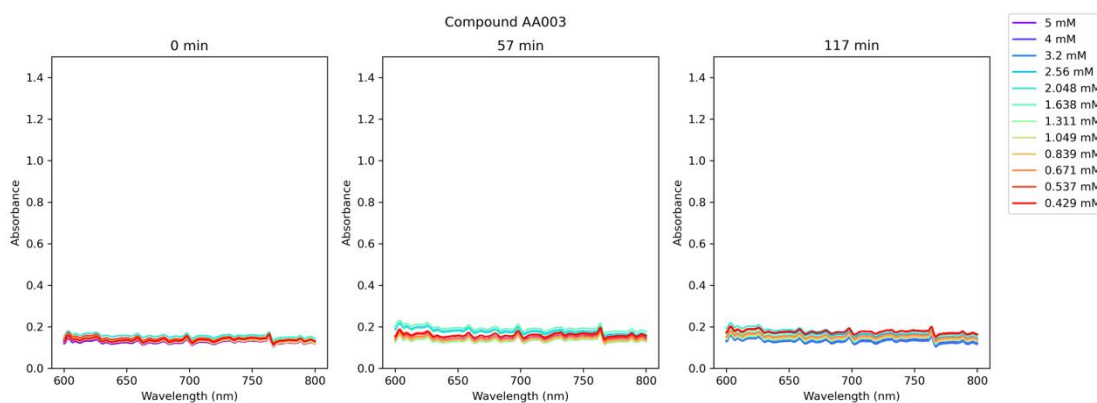

Figure S 3.3: Extinction spectra of the turbidimetric solubility assay after 0, 57, and 117 min for AA003.

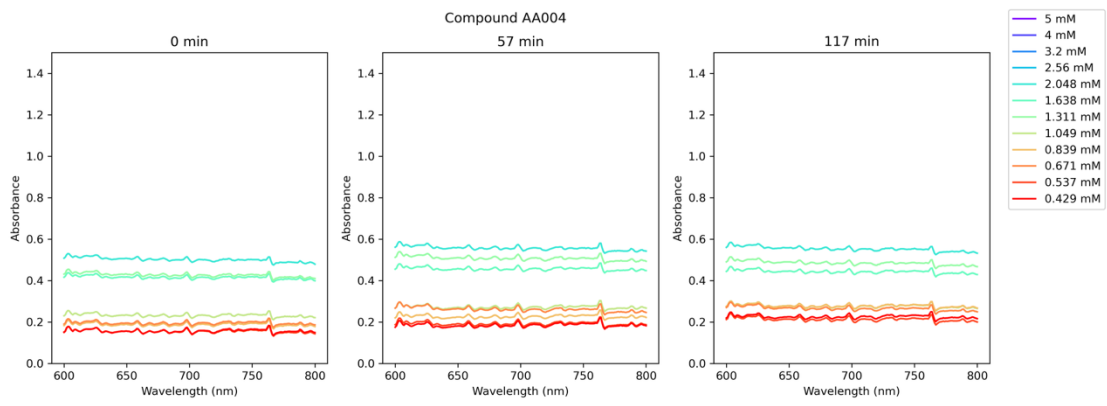

Figure S 3.4: Extinction spectra of the turbidimetric solubility assay after 0, 57, and 117 min for AA004.

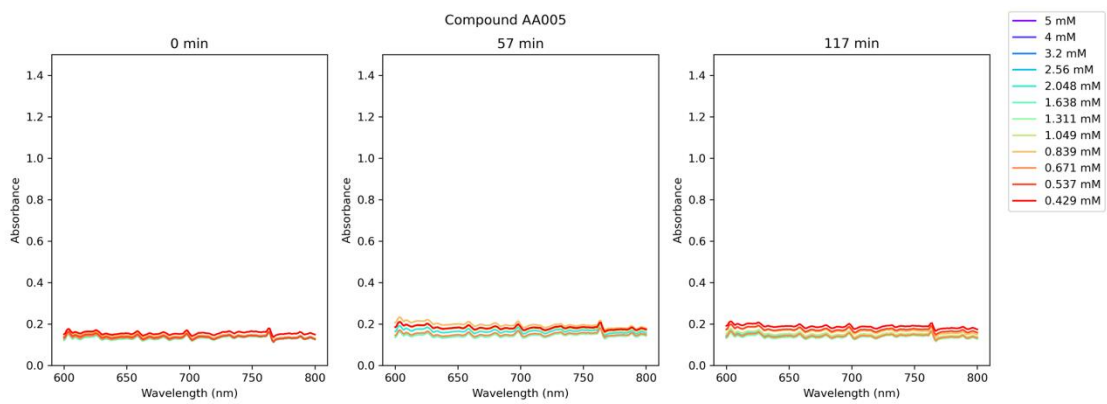

Figure S 3.5: Extinction spectra of the turbidimetric solubility assay after 0, 57, and 117 min for AA005.

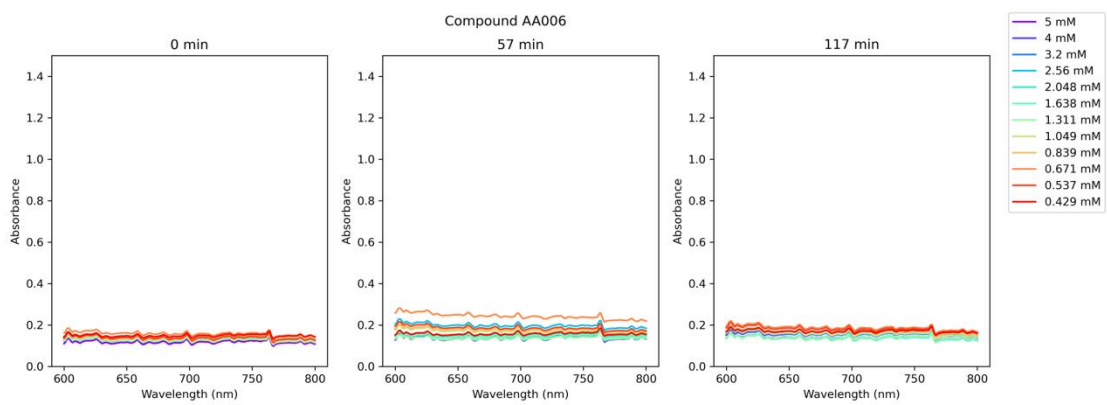

Figure S 3.6: Extinction spectra of the turbidimetric solubility assay after 0, 57, and 117 min for AA006.

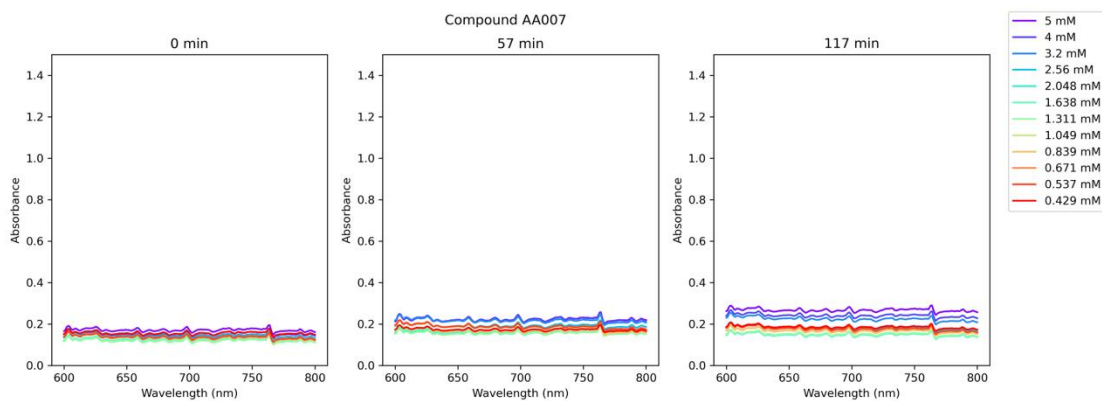

Figure S 3.7: Extinction spectra of the turbidimetric solubility assay after 0, 57, and 117 min for AA007.

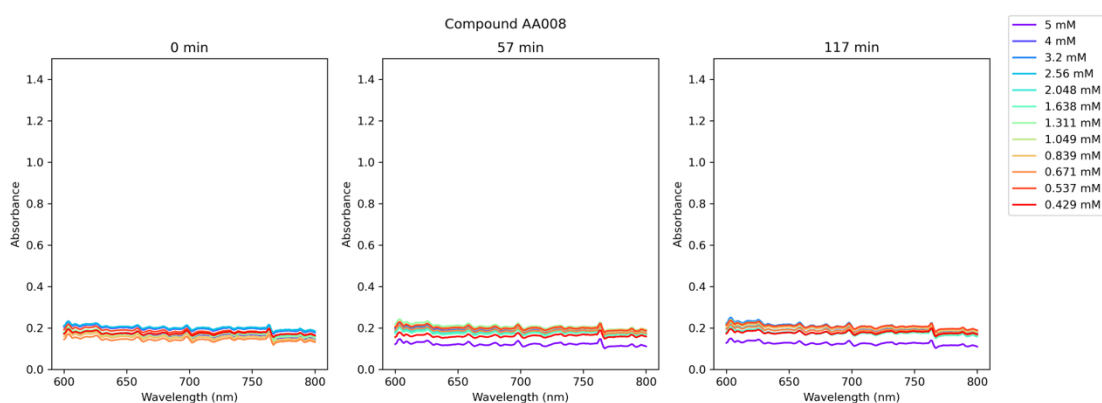

Figure S 3.8: Extinction spectra of the turbidimetric solubility assay after 0, 57, and 117 min for AA008.

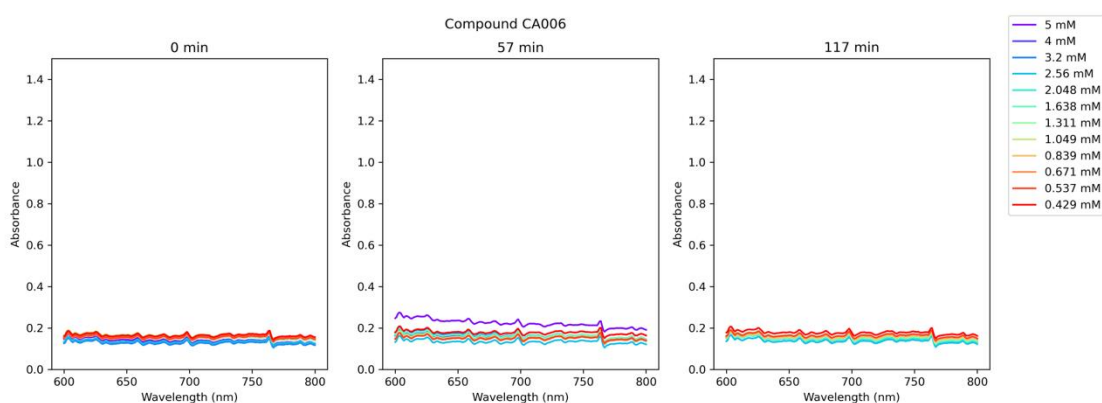

Figure S 3.9: Extinction spectra of the turbidimetric solubility assay after 0, 57, and 117 min for CA006.

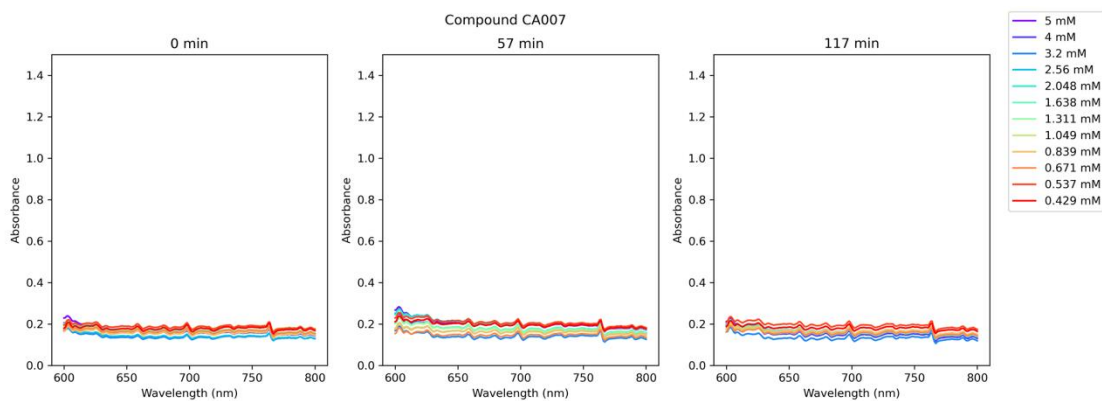

Figure S 3.10: Extinction spectra of the turbidimetric solubility assay after 0, 57, and 117 min for CA007.

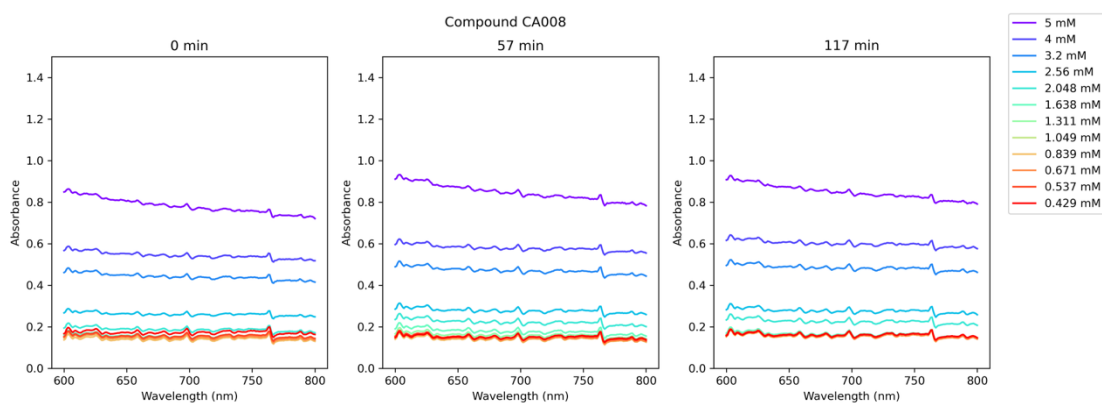

Figure S 3.11: Extinction spectra of the turbidimetric solubility assay after 0, 57, and 117 min for CA008.

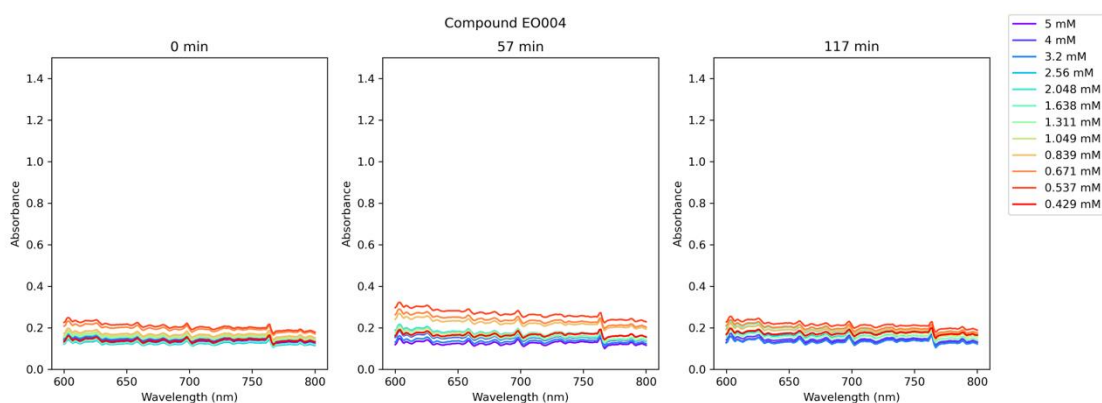

Figure S 3.12: Extinction spectra of the turbidimetric solubility assay after 0, 57, and 117 min for EO004.

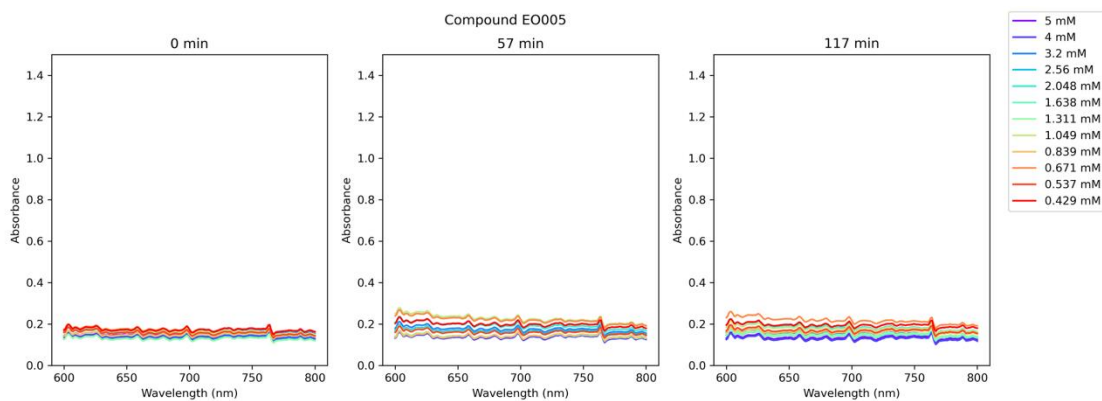

Figure S 3.13: Extinction spectra of the turbidimetric solubility assay after 0, 57, and 117 min for EO005.

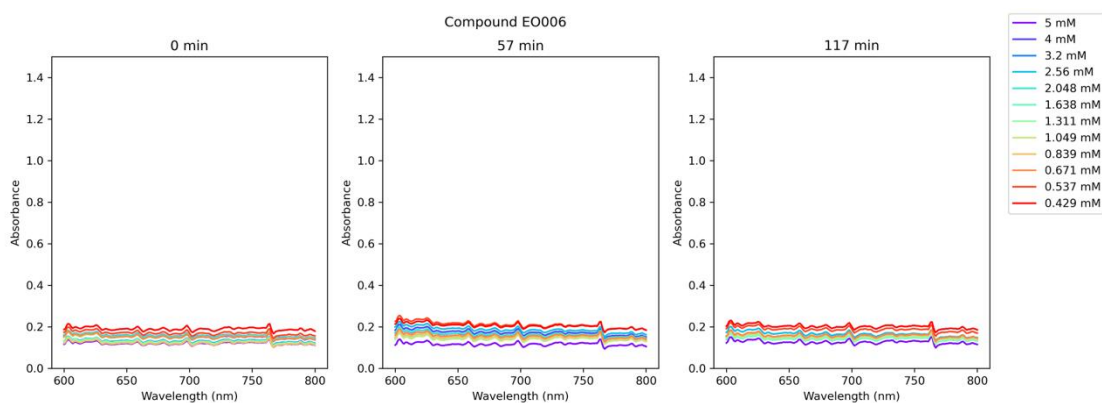

Figure S 3.14: Extinction spectra of the turbidimetric solubility assay after 0, 57, and 117 min for EO006.

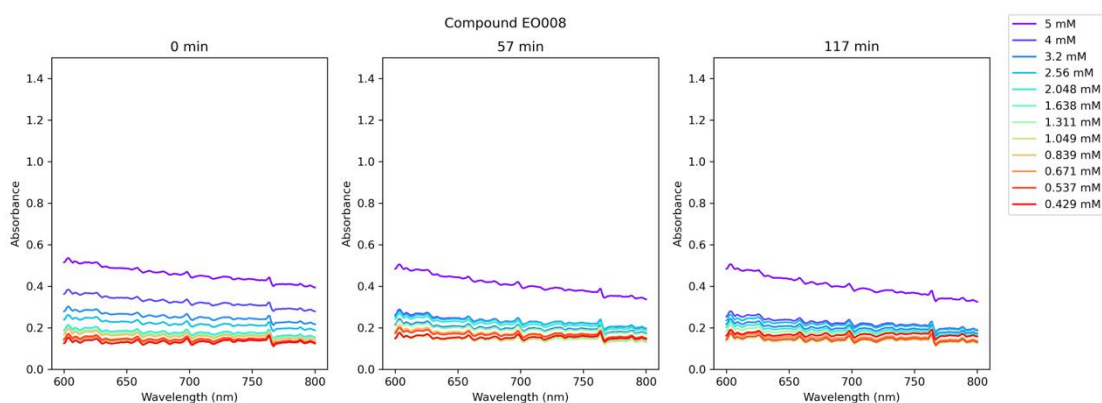

Figure S 3.15: Extinction spectra of the turbidimetric solubility assay after 0, 57, and 117 min for EO008.

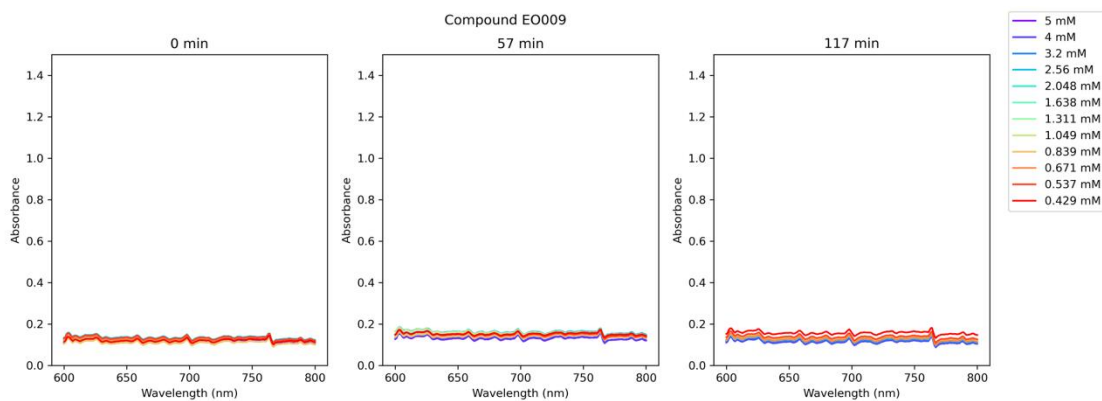

Figure S 3.16: Extinction spectra of the turbidimetric solubility assay after 0, 57, and 117 min for EO009.

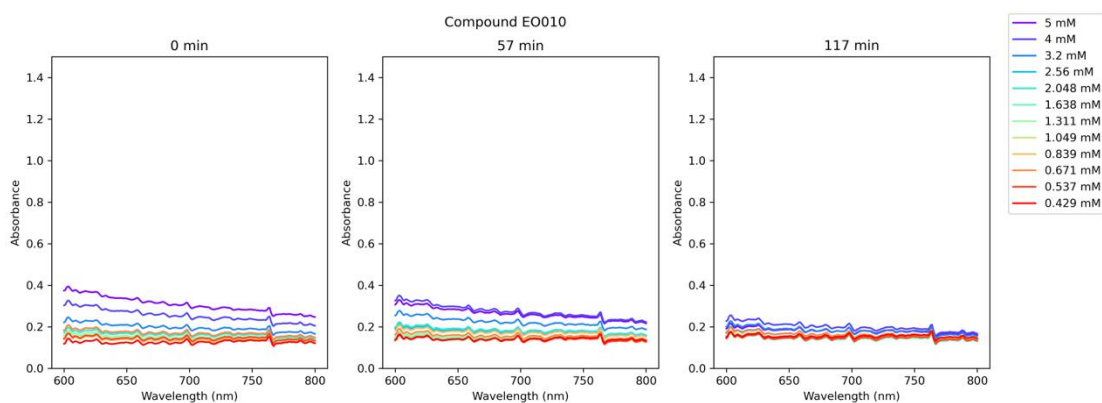

Figure S 3.17: Extinction spectra of the turbidimetric solubility assay after 0, 57, and 117 min for EO010.

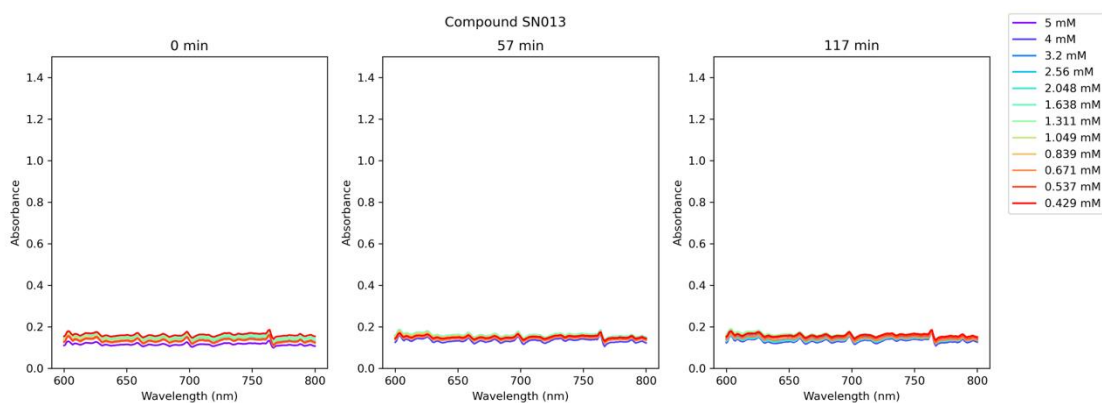

Figure S 3.18: Extinction spectra of the turbidimetric solubility assay after 0, 57, and 117 min for SN013.

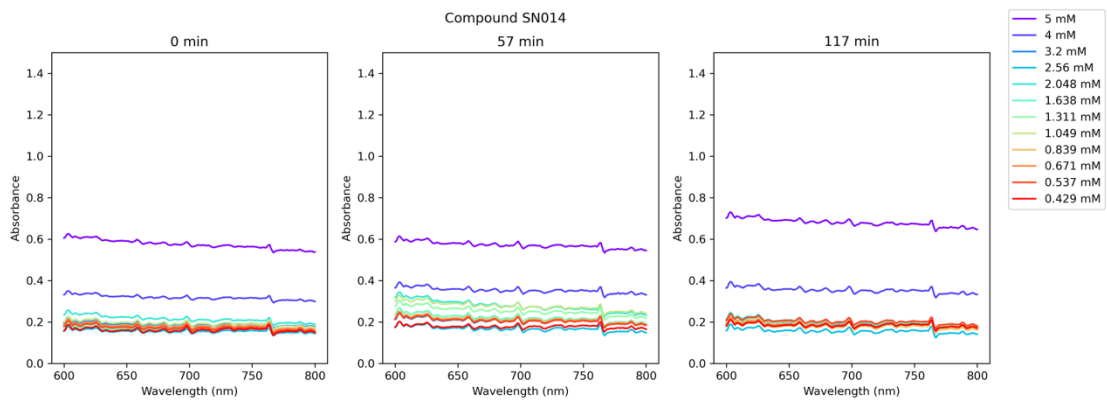

Figure S 3.19: Extinction spectra of the turbidimetric solubility assay after 0, 57, and 117 min for SN014.

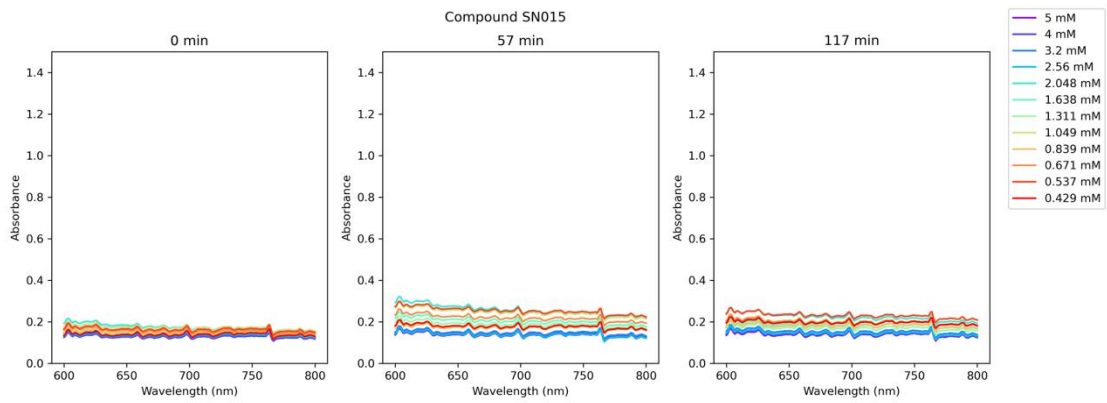

Figure S 3.20: Extinction spectra of the turbidimetric solubility assay after 0, 57, and 117 min for SN014

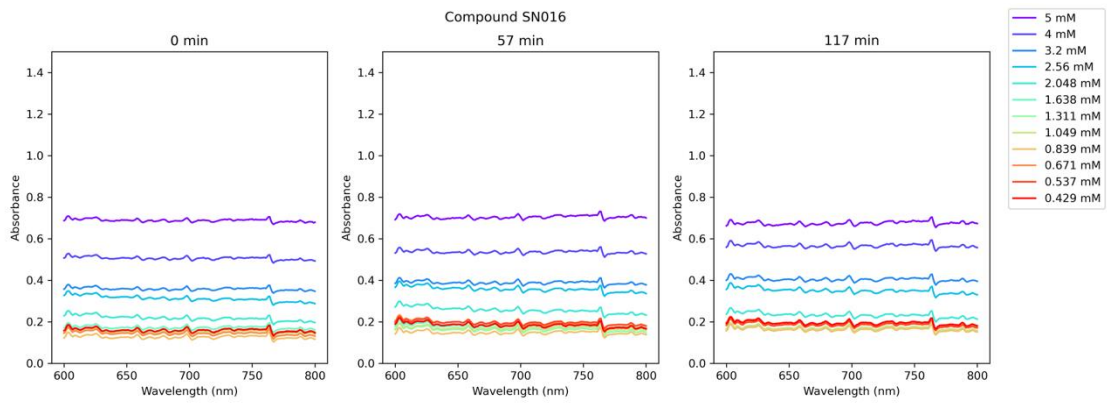

Figure S 3.21: Extinction spectra of the turbidimetric solubility assay after 0, 57, and 117 min for SN016

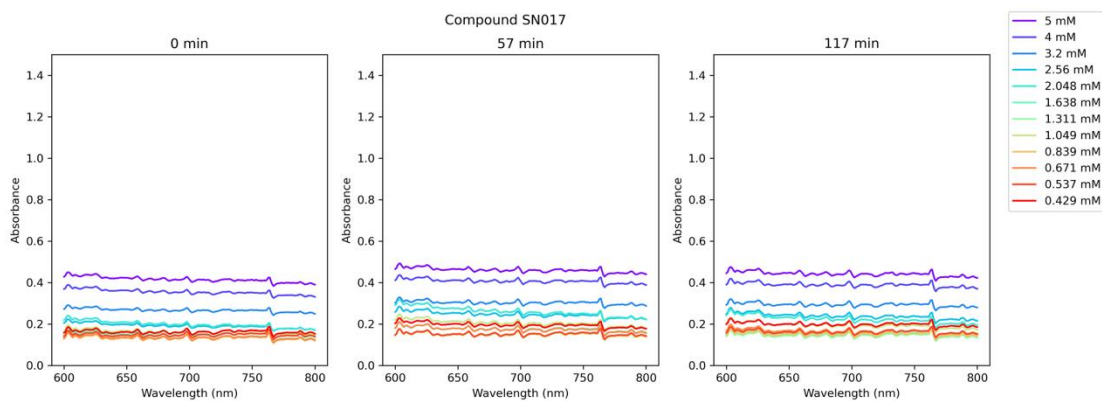

Figure S 3.22: Extinction spectra of the turbidimetric solubility assay after 0, 57, and 117 min for SN017.

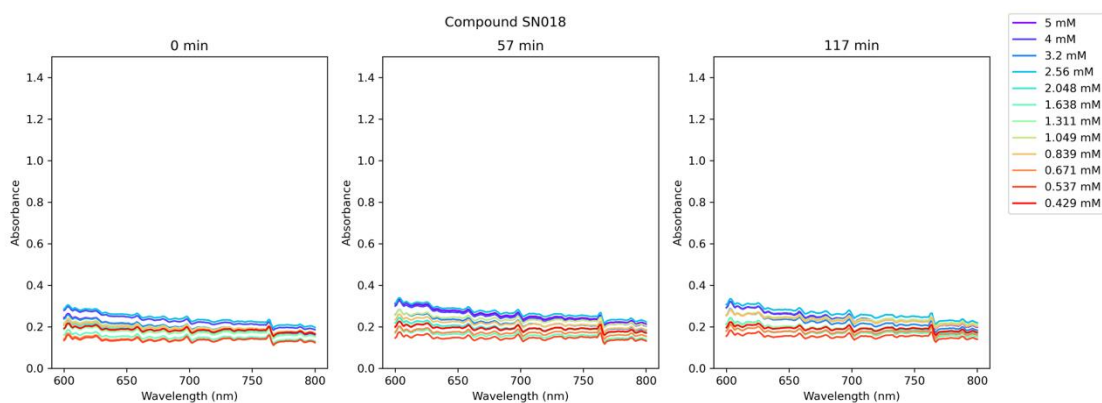

Figure S 3.23: Extinction spectra of the turbidimetric solubility assay after 0, 57, and 117 min for SN018.

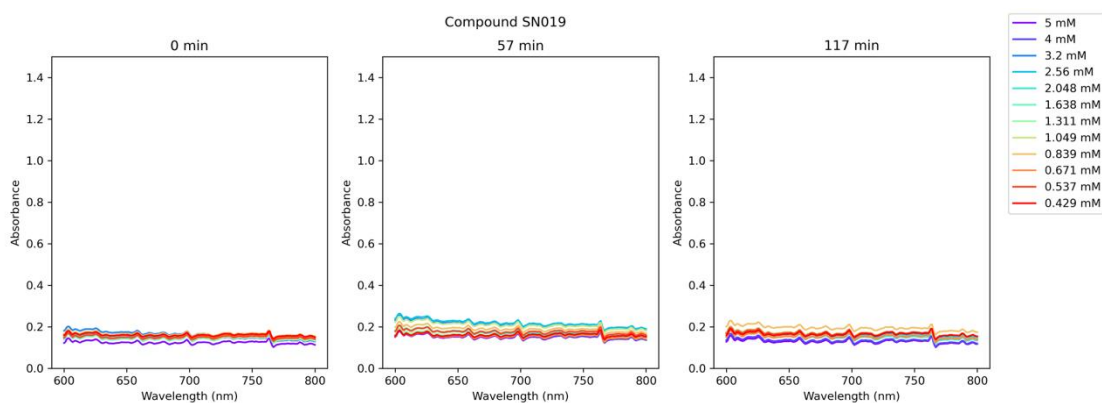

Figure S 3.24: Extinction spectra of the turbidimetric solubility assay after 0, 57, and 117 min for SN019.

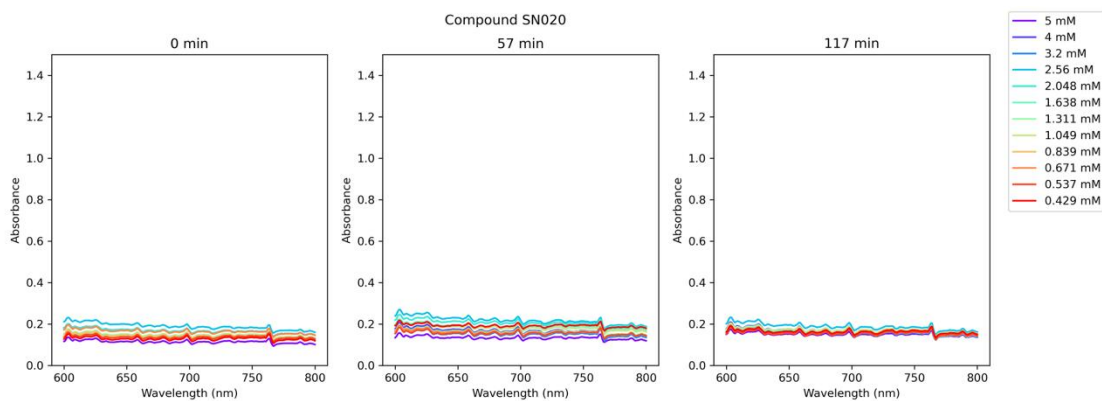

Figure S 3.25: Extinction spectra of the turbidimetric solubility assay after 0, 57, and 117 min for SN020.

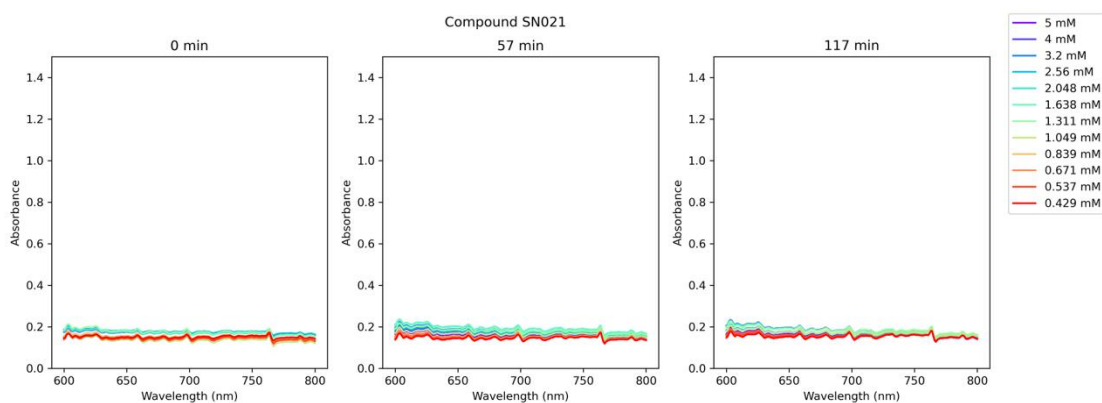

Figure S 3.26: Extinction spectra of the turbidimetric solubility assay after 0, 57, and 117 min for SN021.

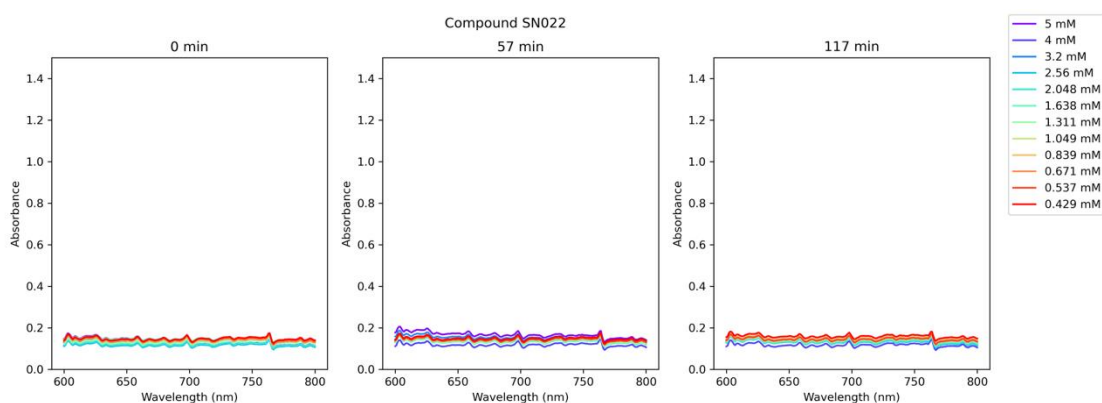

Figure S 3.27: Extinction spectra of the turbidimetric solubility assay after 0, 57, and 117 min for SN022.

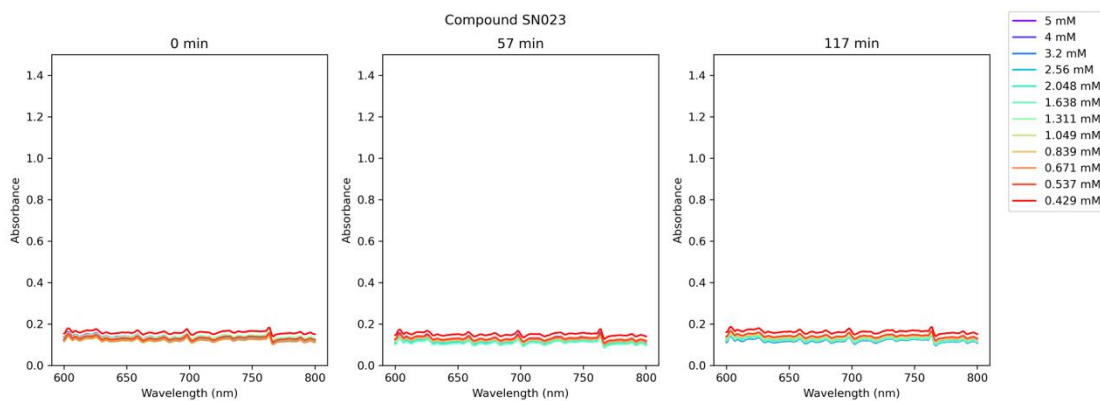

Figure S 3.28: Extinction spectra of the turbidimetric solubility assay after 0, 57, and 117 min for SN023.

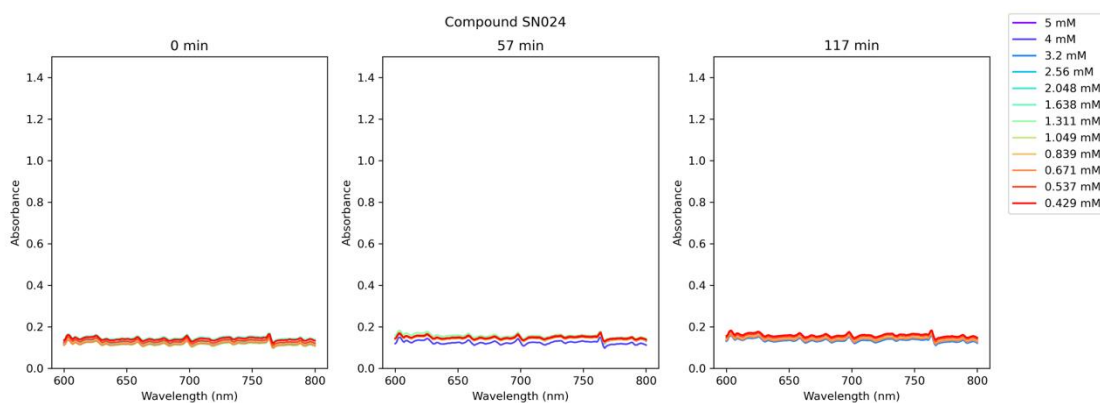

Figure S 3.29: Extinction spectra of the turbidimetric solubility assay after 0, 57, and 117 min for SN024.

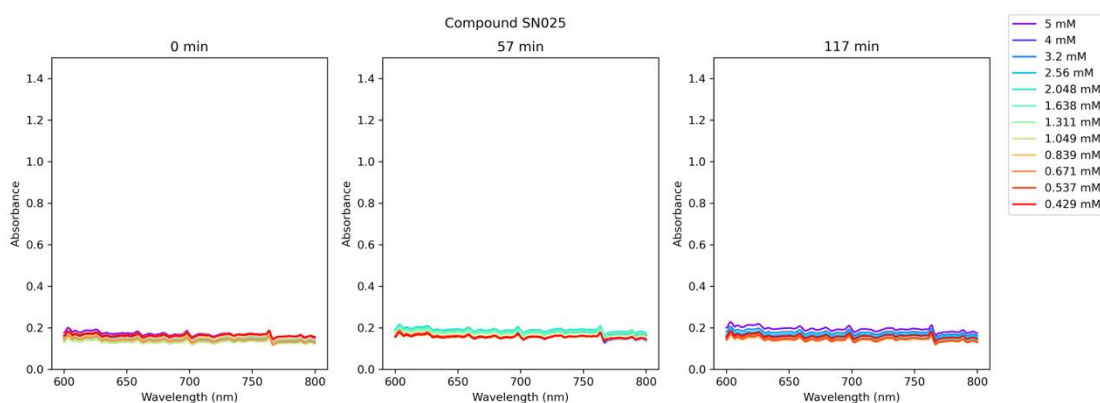

Figure S 3.30: Extinction spectra of the turbidimetric solubility assay after 0, 57, and 117 min for SN025.

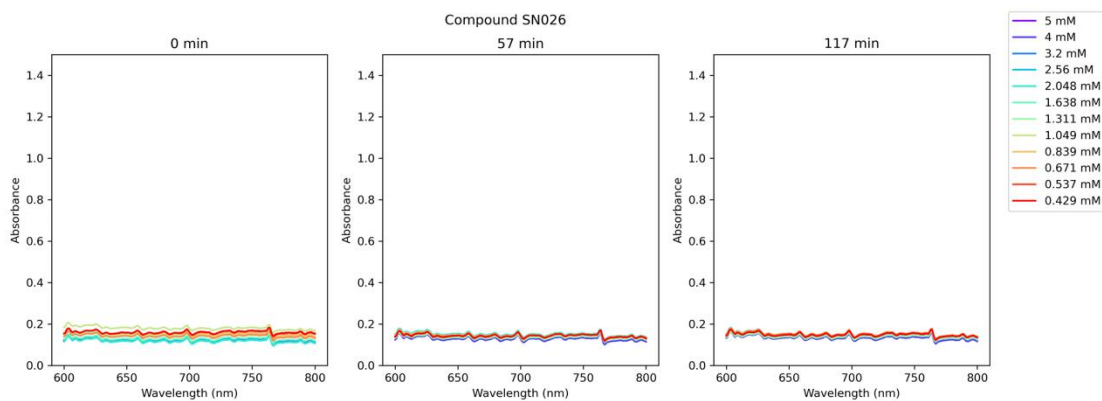

Figure S 3.31: Extinction spectra of the turbidimetric solubility assay after 0, 57, and 117 min for SN026.

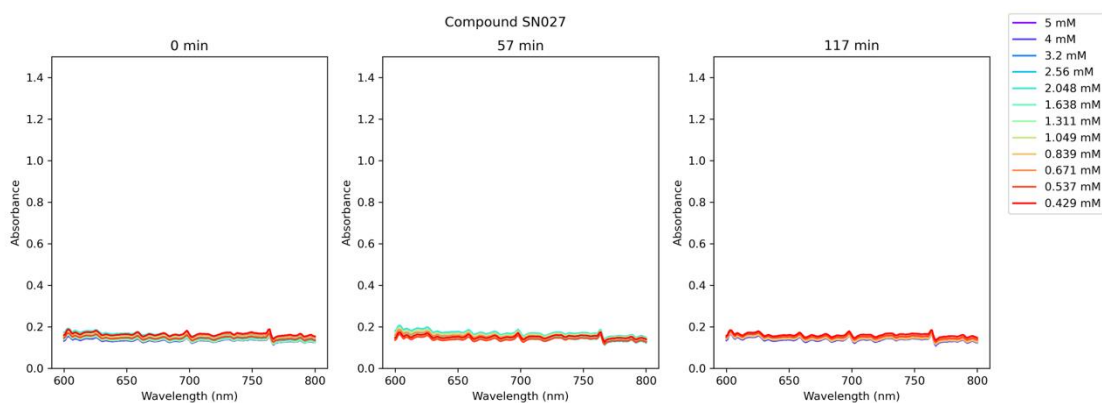

Figure S 3.32: Extinction spectra of the turbidimetric solubility assay after 0, 57, and 117 min for SN027.

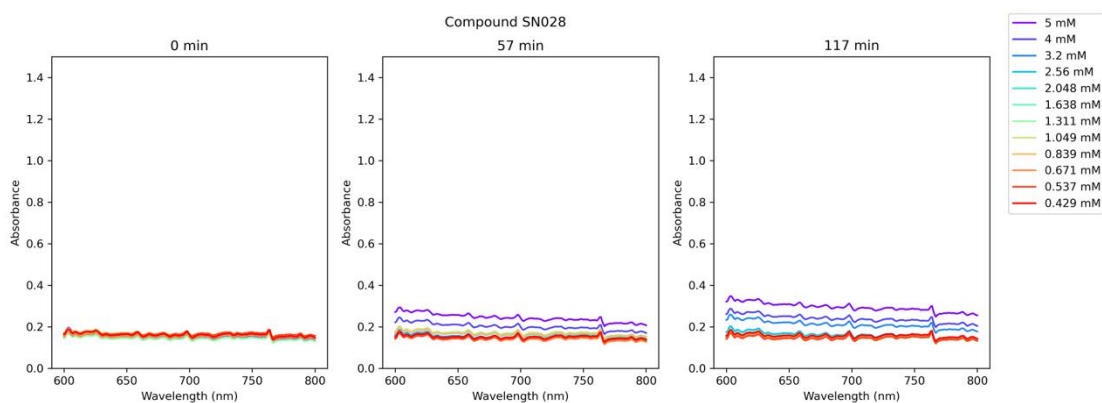

Figure S 3.33: Extinction spectra of the turbidimetric solubility assay after 0, 57, and 117 min for SN028.

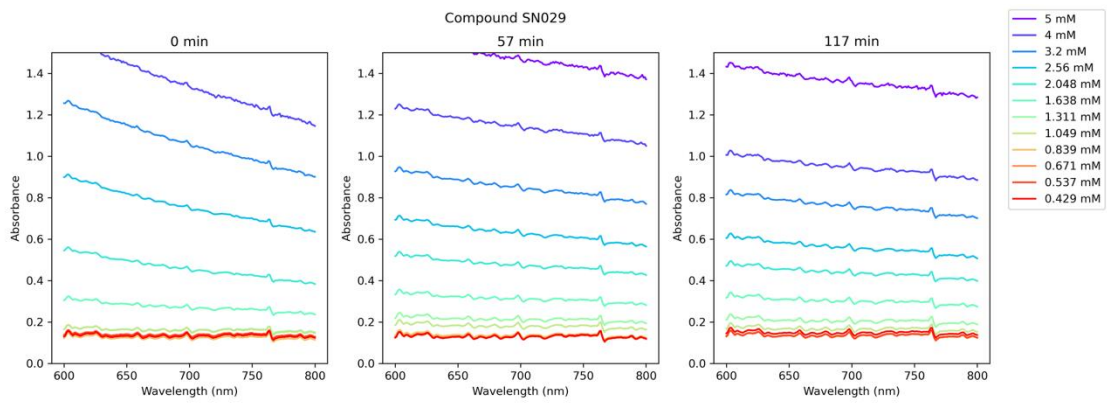

Figure S 3.34: Extinction spectra of the turbidimetric solubility assay after 0, 57, and 117 min for SN029.

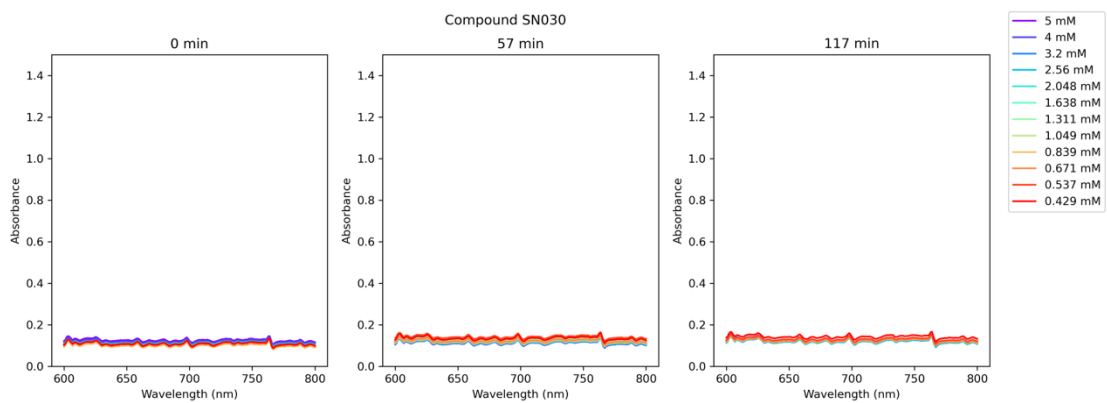

Figure S 3.35: Extinction spectra of the turbidimetric solubility assay after 0, 57, and 117 min for SN030.

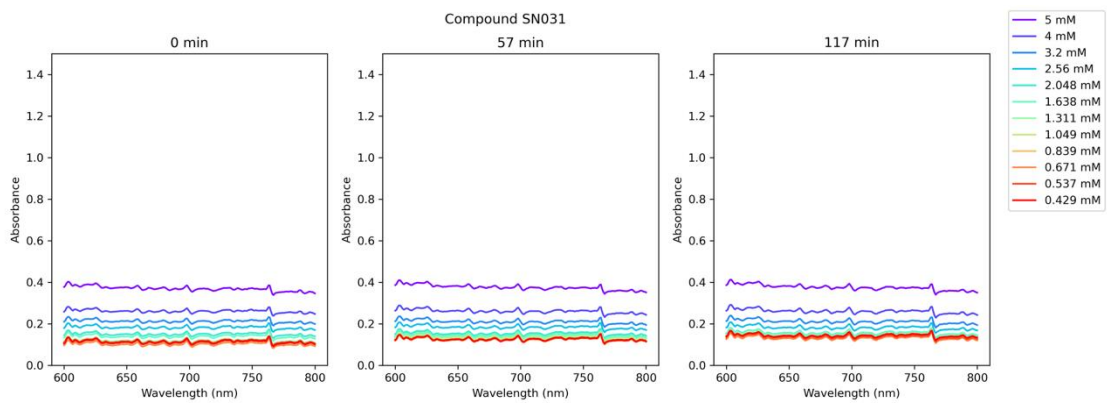

Figure S 3.36: Extinction spectra of the turbidimetric solubility assay after 0, 57, and 117 min for SN031.

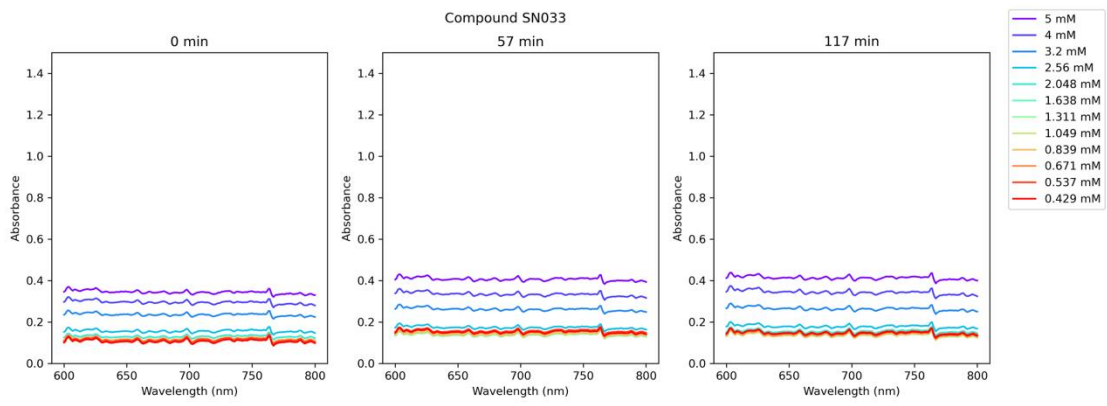

Figure S 3.37: Extinction spectra of the turbidimetric solubility assay after 0, 57, and 117 min for SN033.

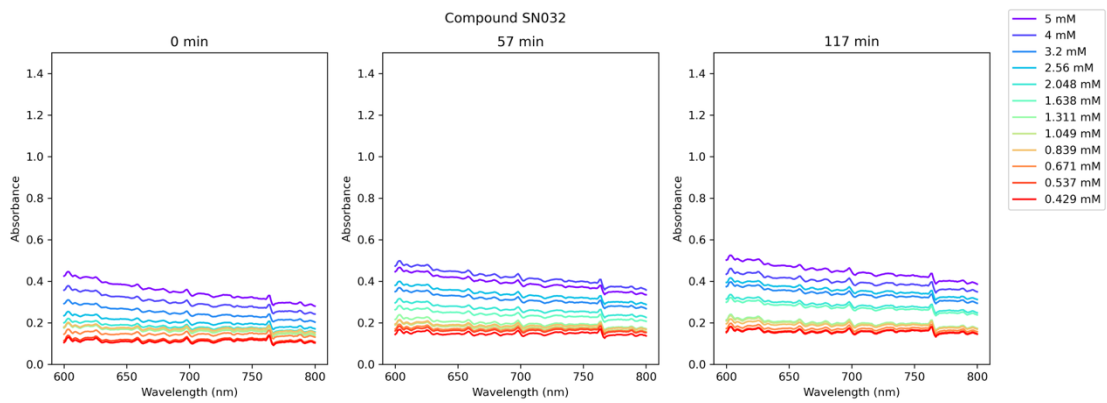

Figure S 3.38: Extinction spectra of the turbidimetric solubility assay after 0, 57, and 117 min for SN032.

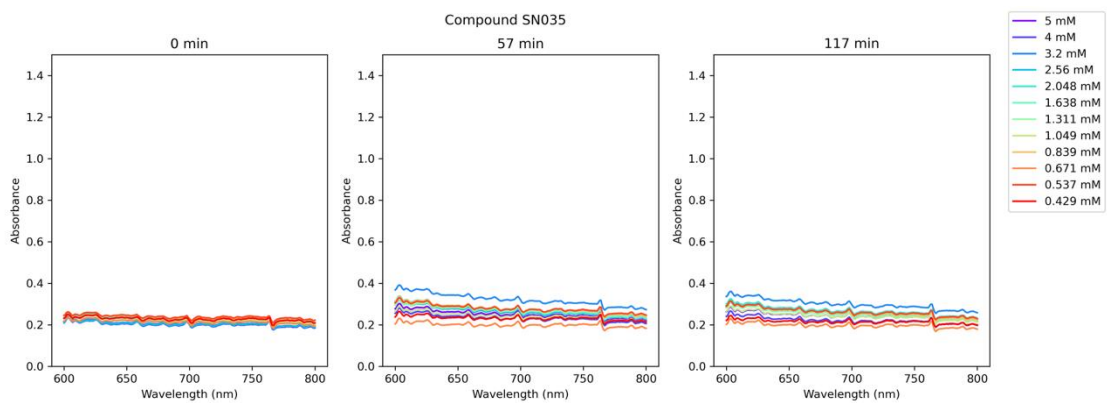

Figure S 3.39: Extinction spectra of the turbidimetric solubility assay after 0, 57, and 117 min for SN035.

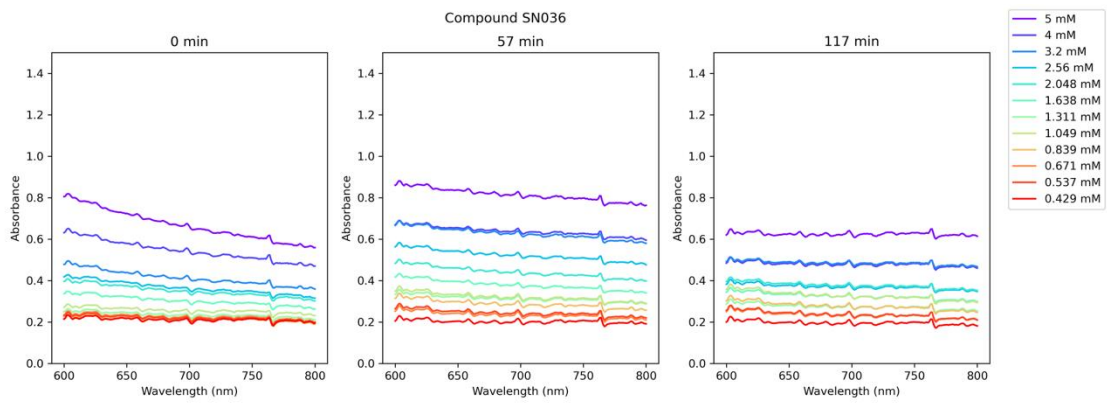

Figure S 3.40: Extinction spectra of the turbidimetric solubility assay after 0, 57, and 117 min for SN036.

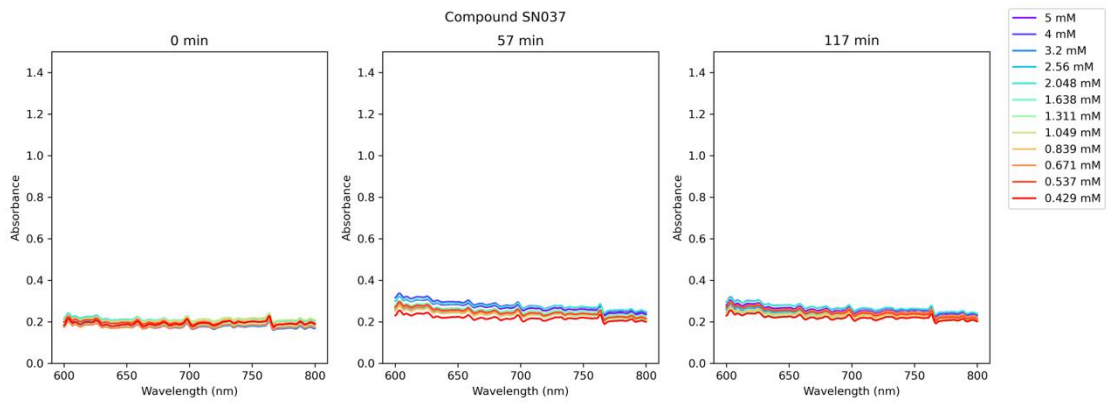

Figure S 3.41: Extinction spectra of the turbidimetric solubility assay after 0, 57, and 117 min for SN037.

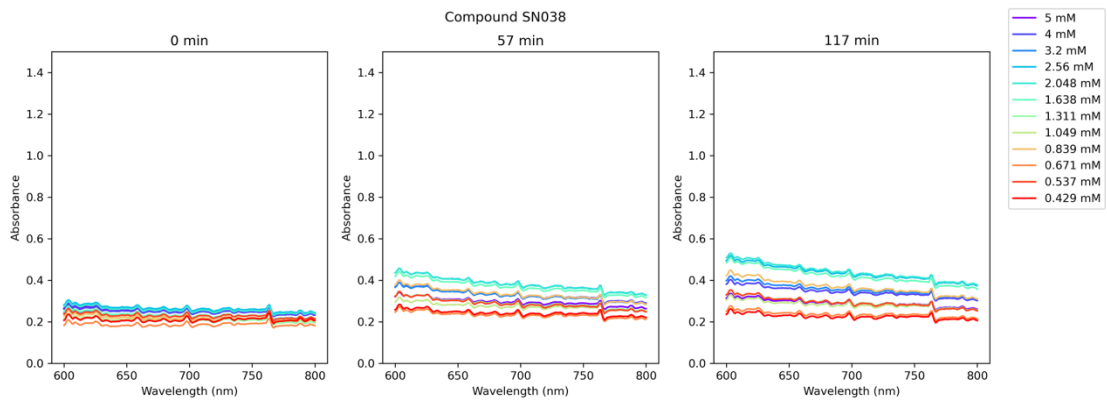

Figure S 3.42: Extinction spectra of the turbidimetric solubility assay after 0, 57, and 117 min for SN038.

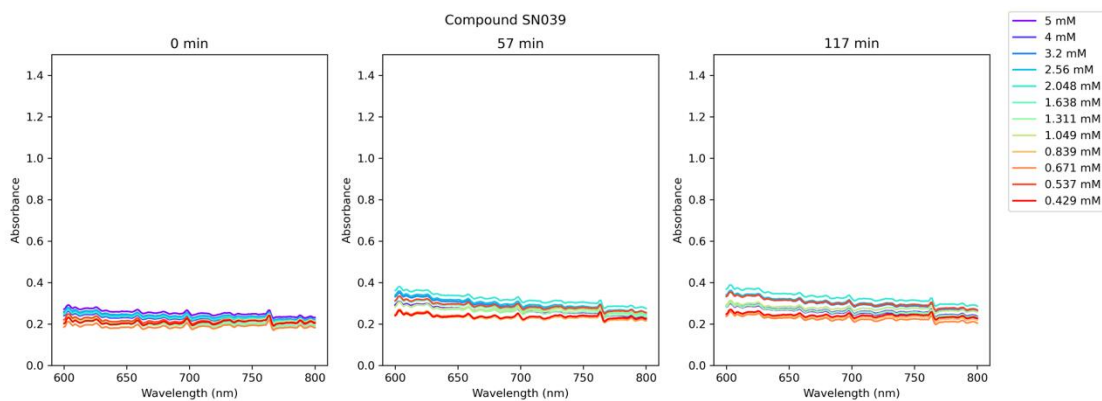

Figure S 3.43: Extinction spectra of the turbidimetric solubility assay after 0, 57, and 117 min for SN039.

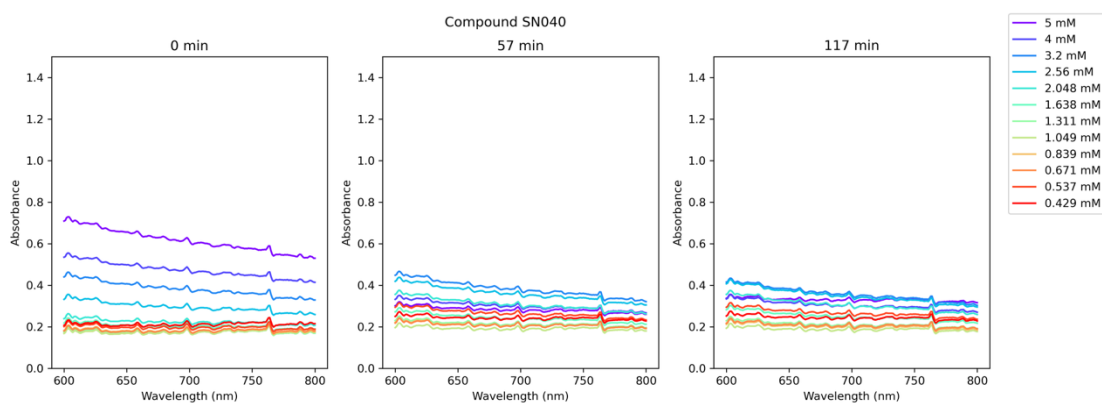

Figure S 3.44: Extinction spectra of the turbidimetric solubility assay after 0, 57, and 117 min for SN040.

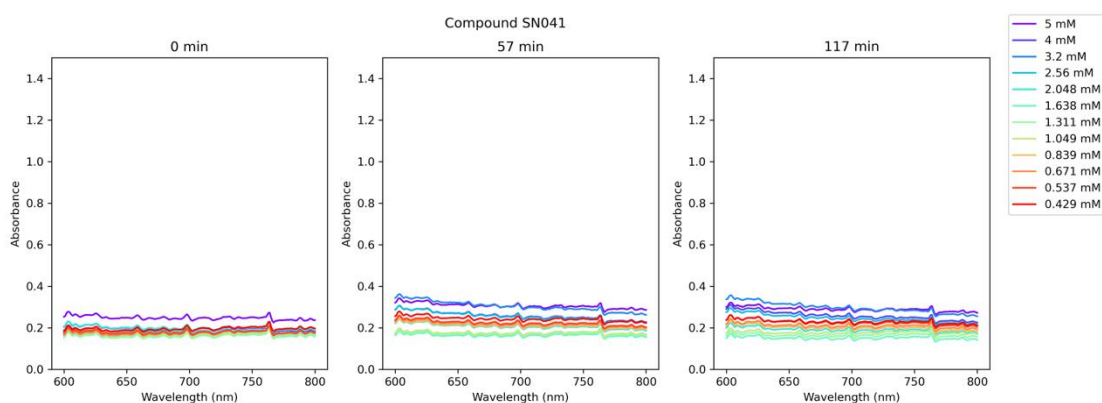

Figure S 3.45: Extinction spectra of the turbidimetric solubility assay after 0, 57, and 117 min for SN041.

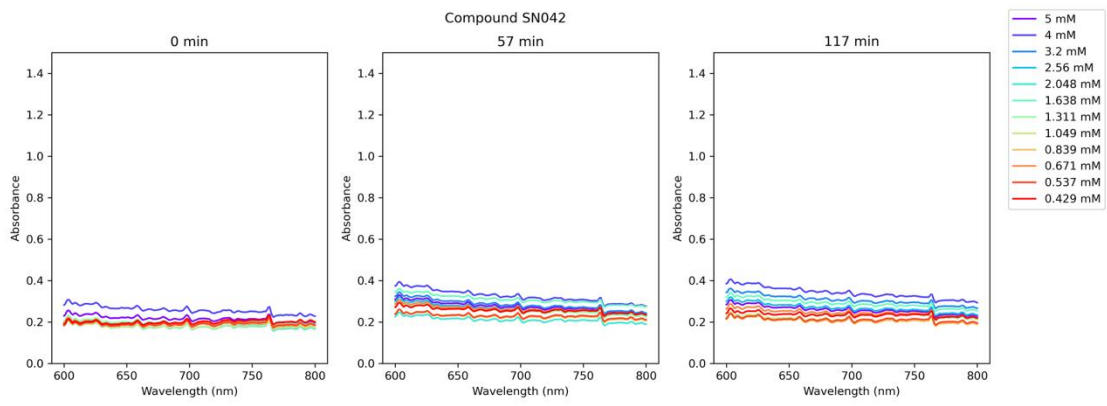

Figure S 3.46: Extinction spectra of the turbidimetric solubility assay after 0, 57, and 117 min for SN042.

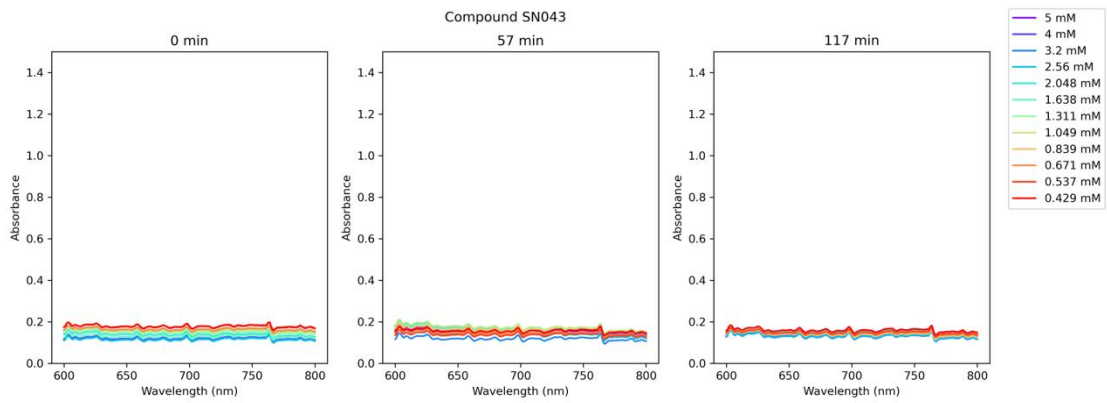

Figure S 3.47: Extinction spectra of the turbidimetric solubility assay after 0, 57, and 117 min for SN043.

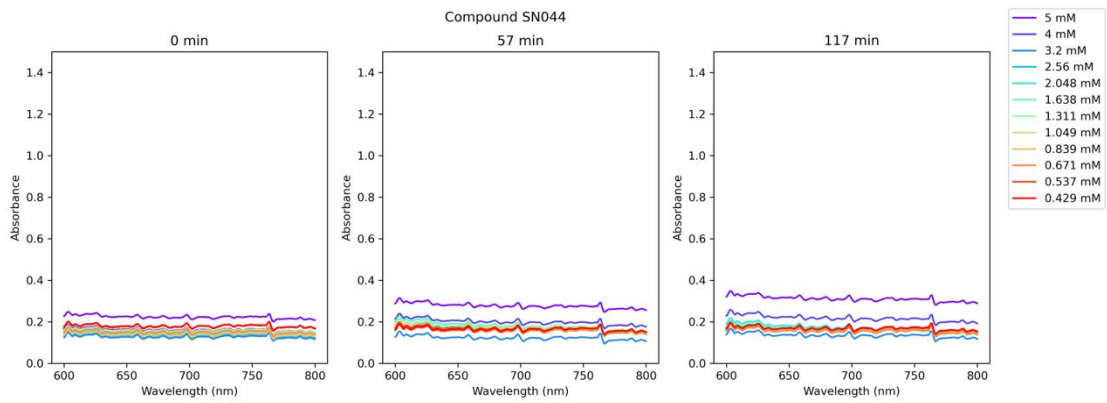

Figure S 3.48: Extinction spectra of the turbidimetric solubility assay after 0, 57, and 117 min for SN044.

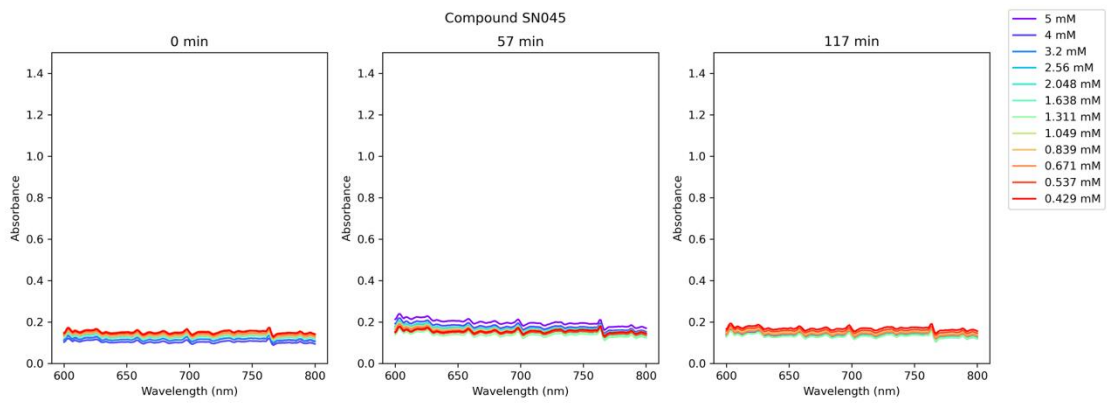

Figure S 3.49: Extinction spectra of the turbidimetric solubility assay after 0, 57, and 117 min for SN045.

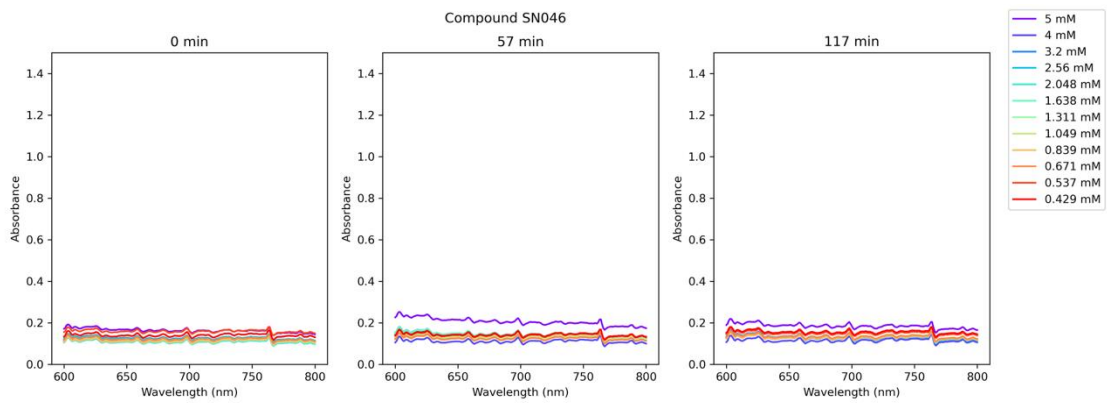

Figure S 3.50: Extinction spectra of the turbidimetric solubility assay after 0, 57, and 117 min for SN046.

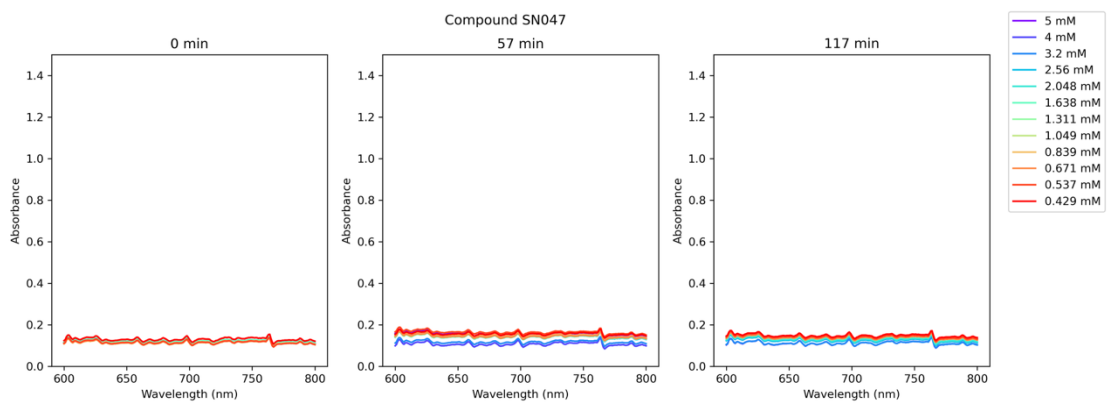

Figure S 3.51: Extinction spectra of the turbidimetric solubility assay after 0, 57, and 117 min for SN047.

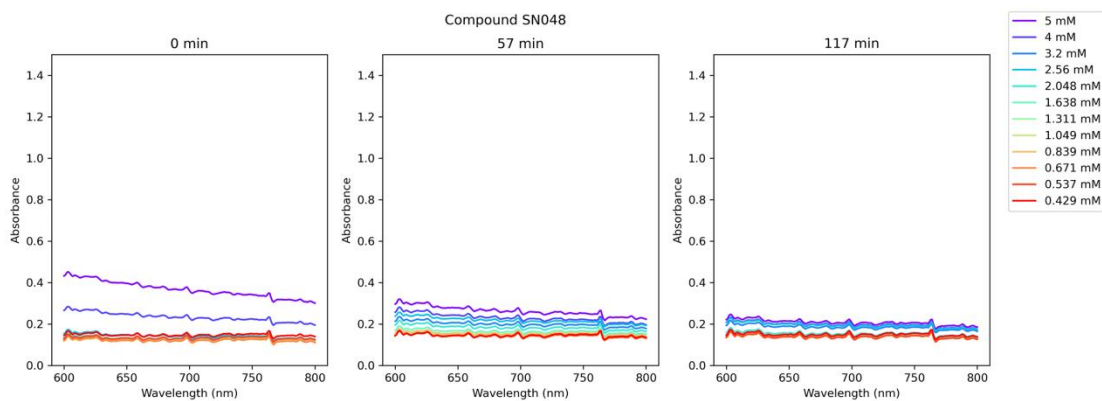

Figure S 3.52: Extinction spectra of the turbidimetric solubility assay after 0, 57, and 117 min for SN048.

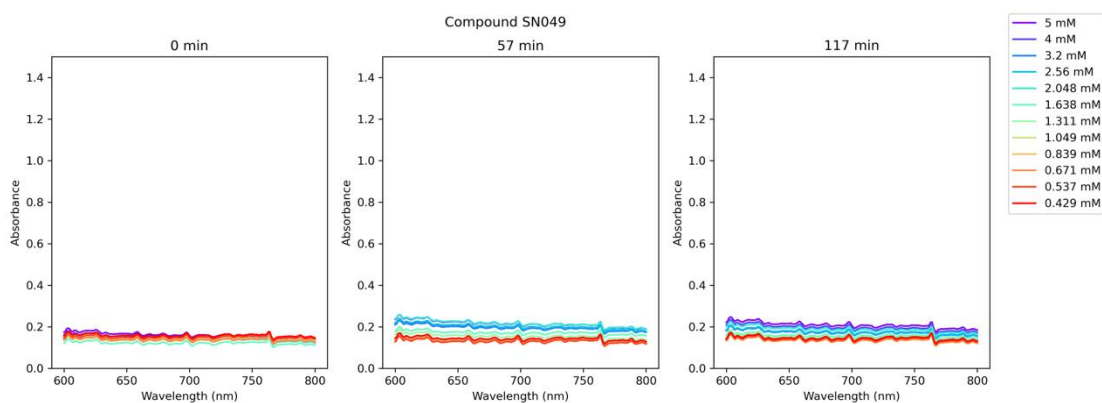

Figure S 3.53: Extinction spectra of the turbidimetric solubility assay after 0, 57, and 117 min for SN049.

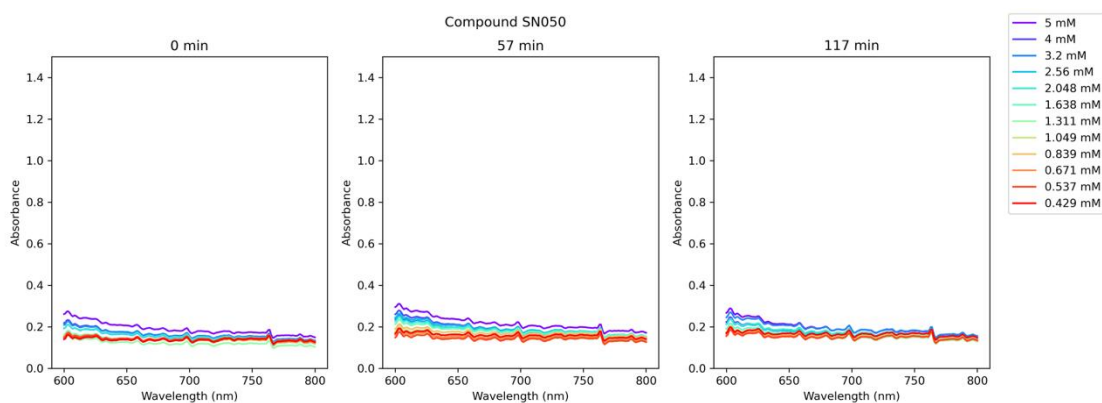

Figure S 3.54: Extinction spectra of the turbidimetric solubility assay after 0, 57, and 117 min for SN050

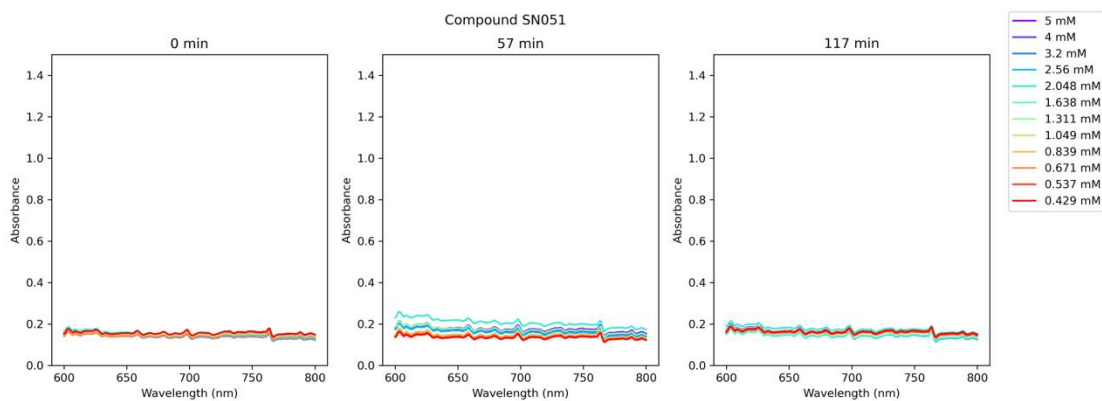

Figure S 3.55: Extinction spectra of the turbidimetric solubility assay after 0, 57, and 117 min for SN051.

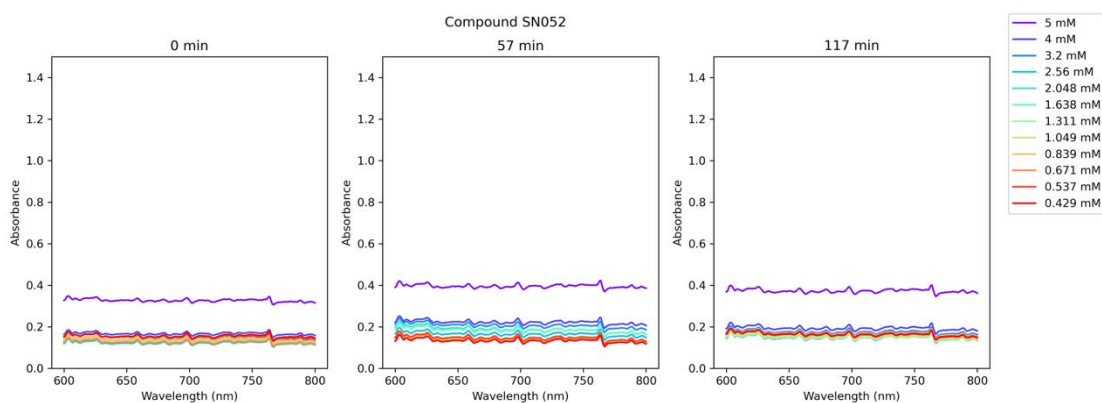

Figure S 3.56: Extinction spectra of the turbidimetric solubility assay after 0, 57, and 117 min for SN052.

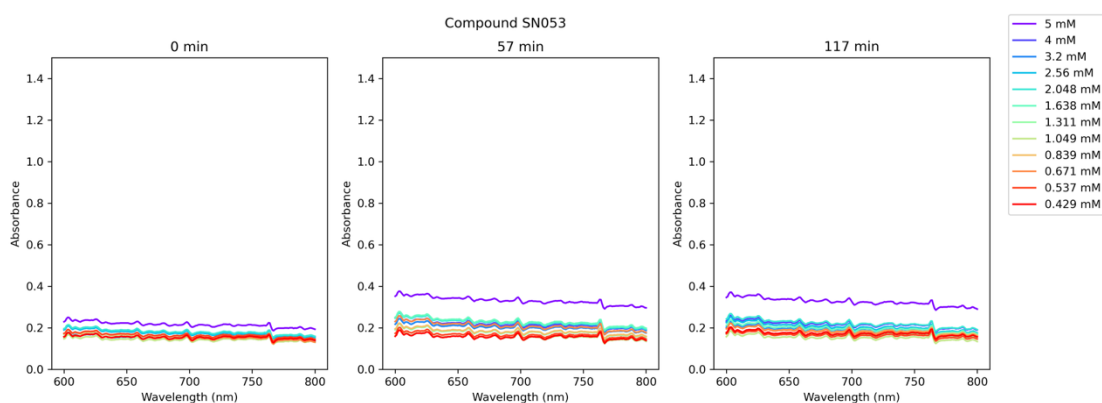

Figure S 3.57: Extinction spectra of the turbidimetric solubility assay after 0, 57, and 117 min for SN053.

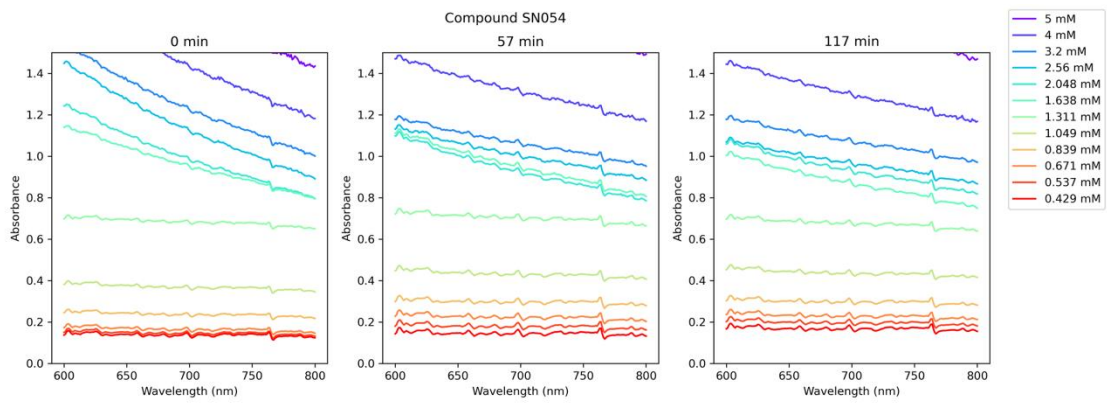

Figure S 3.58: Extinction spectra of the turbidimetric solubility assay after 0, 57, and 117 min for SN054.

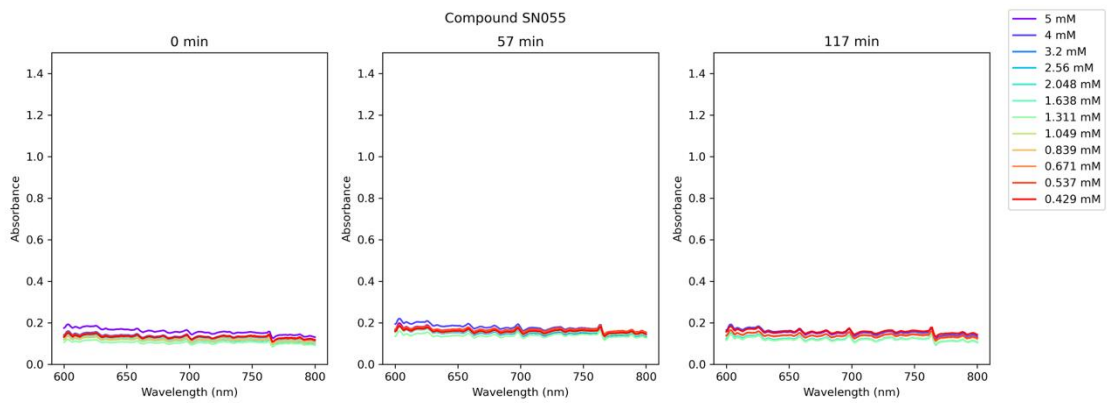

Figure S 3.59: Extinction spectra of the turbidimetric solubility assay after 0, 57, and 117 min for SN055.

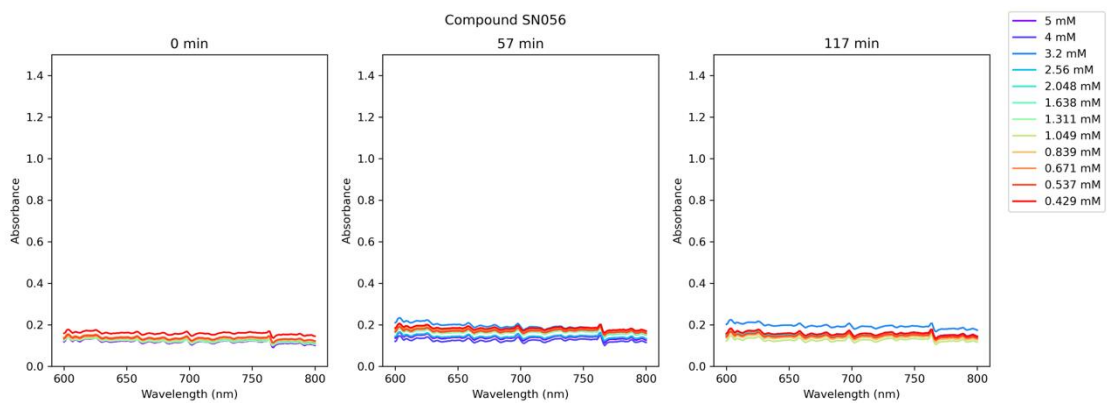

Figure S 3.60: Extinction spectra of the turbidimetric solubility assay after 0, 57, and 117 min for SN056.

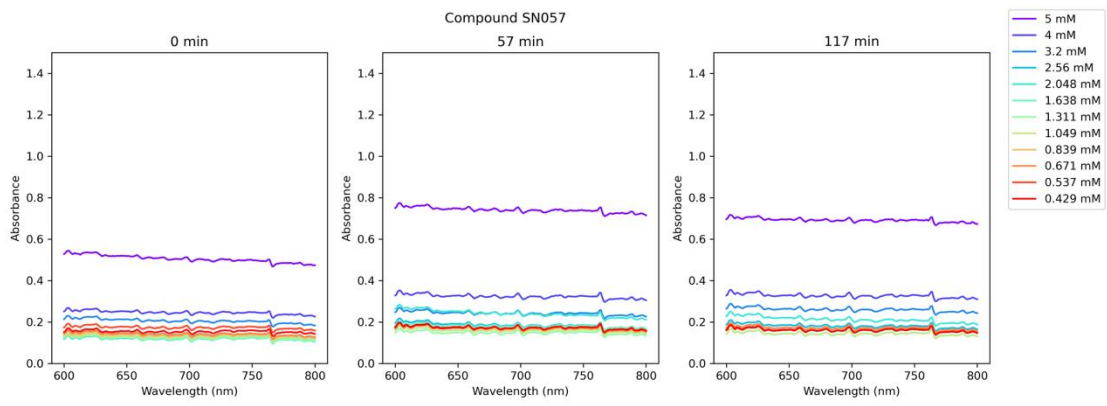

Figure S 3.61: Extinction spectra of the turbidimetric solubility assay after 0, 57, and 117 min for SN057.

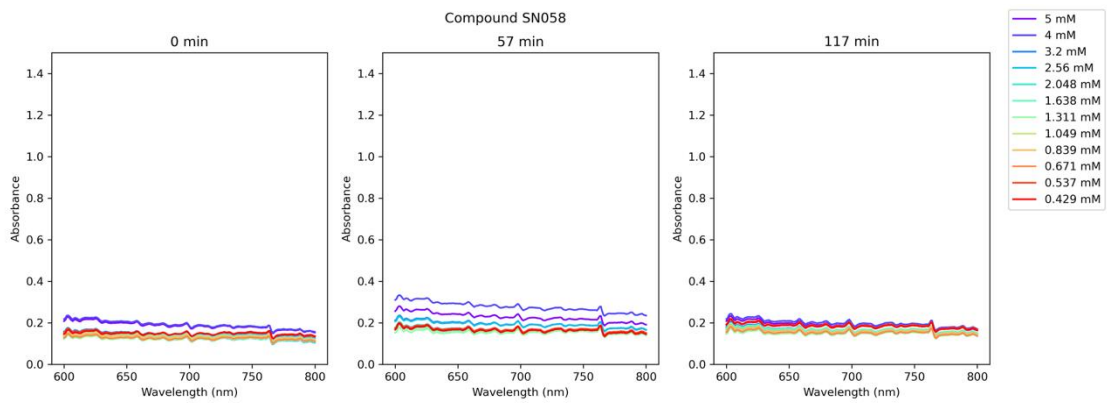

Figure S 3.62: Extinction spectra of the turbidimetric solubility assay after 0, 57, and 117 min for SN058.

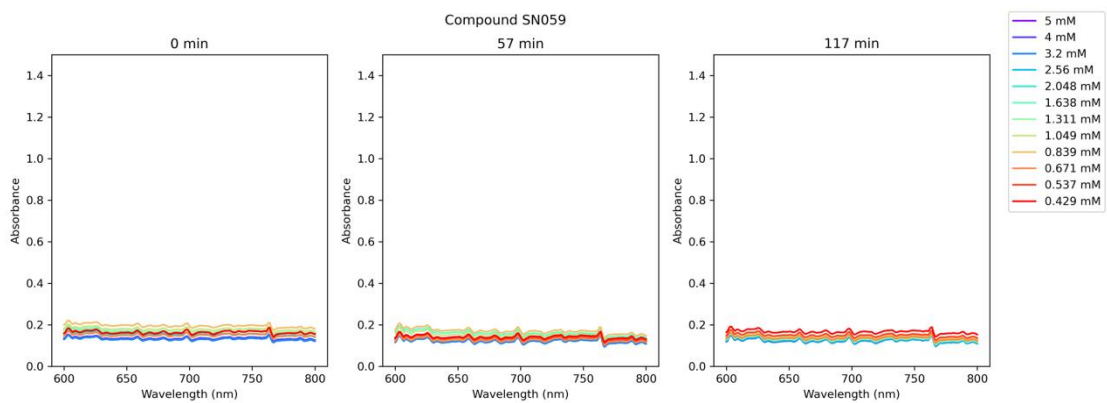

Figure S 3.63: Extinction spectra of the turbidimetric solubility assay after 0, 57, and 117 min for SN059.

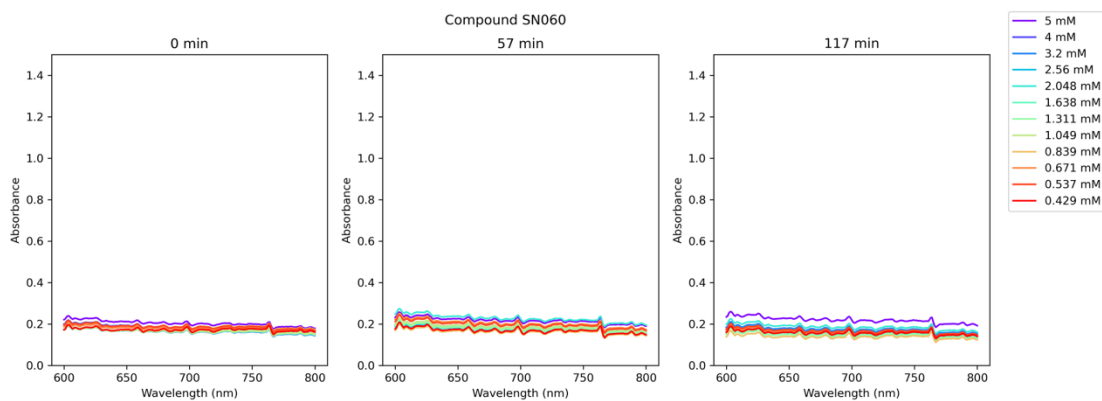

Figure S 3.64: Extinction spectra of the turbidimetric solubility assay after 0, 57, and 117 min for SN060.

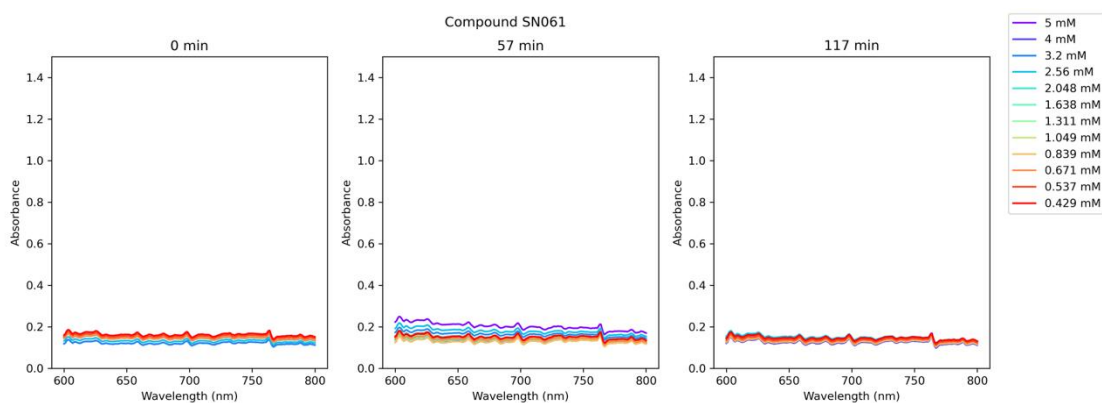

Figure S 3.65: Extinction spectra of the turbidimetric solubility assay after 0, 57, and 117 min for SN061.

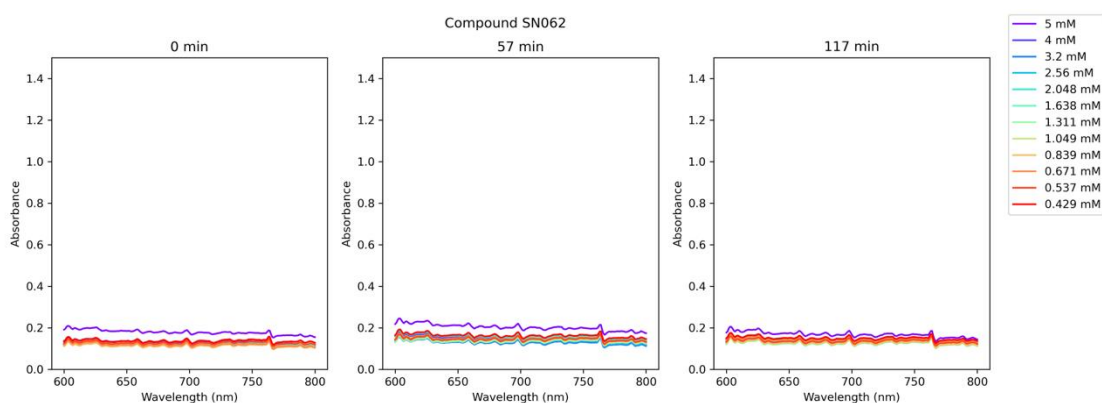

Figure S 3.66: Extinction spectra of the turbidimetric solubility assay after 0, 57, and 117 min for SN062.

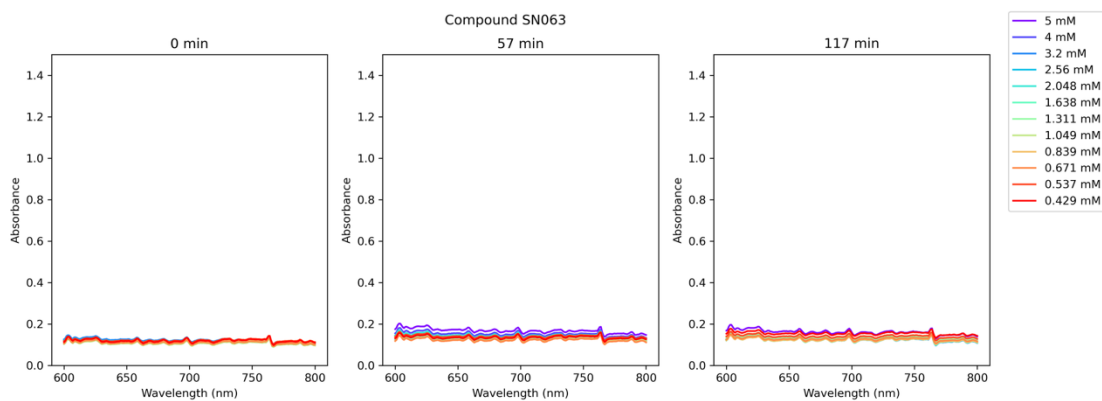

Figure S 3.67: Extinction spectra of the turbidimetric solubility assay after 0, 57, and 117 min for SN063.

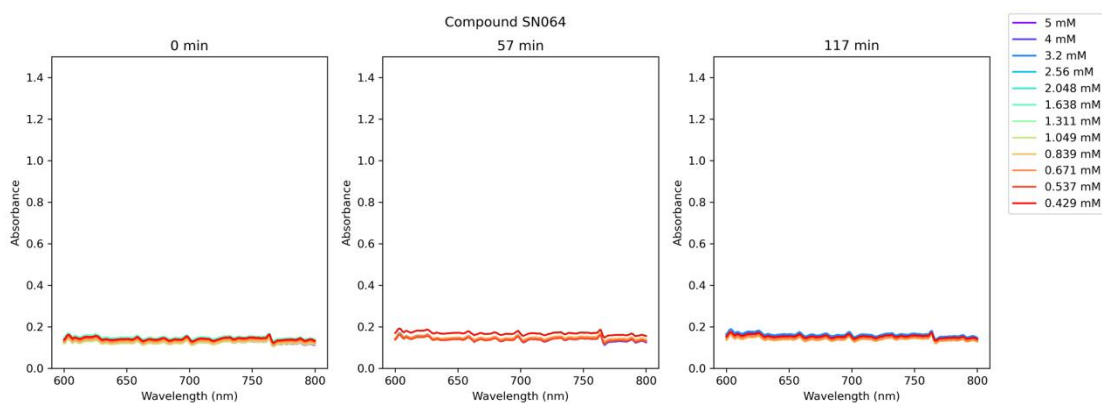

Figure S 3.68: Extinction spectra of the turbidimetric solubility assay after 0, 57, and 117 min for SN064.

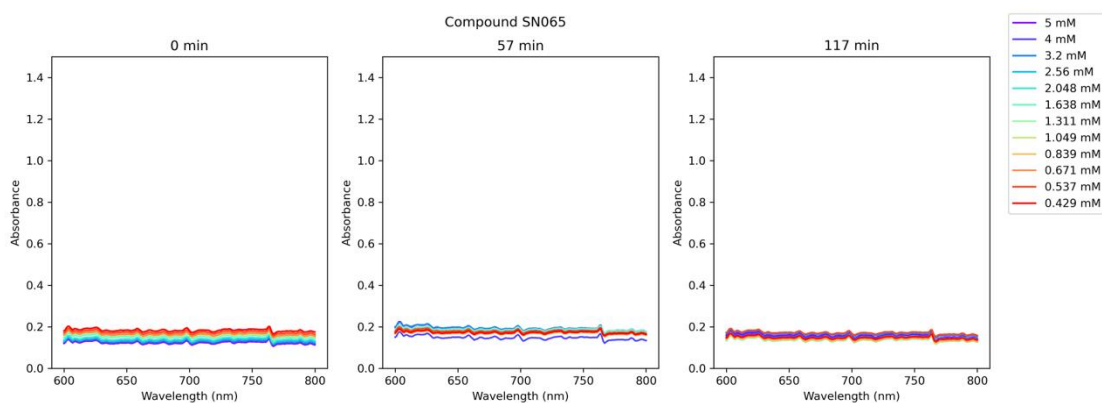

Figure S 3.69: Extinction spectra of the turbidimetric solubility assay after 0, 57, and 117 min for SN066.

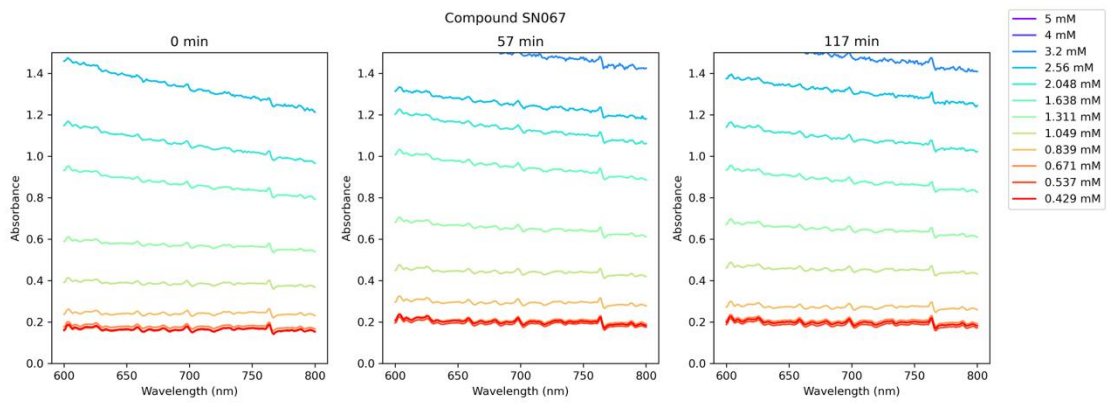

Figure S 3.70: Extinction spectra of the turbidimetric solubility assay after 0, 57, and 117 min for SN067.

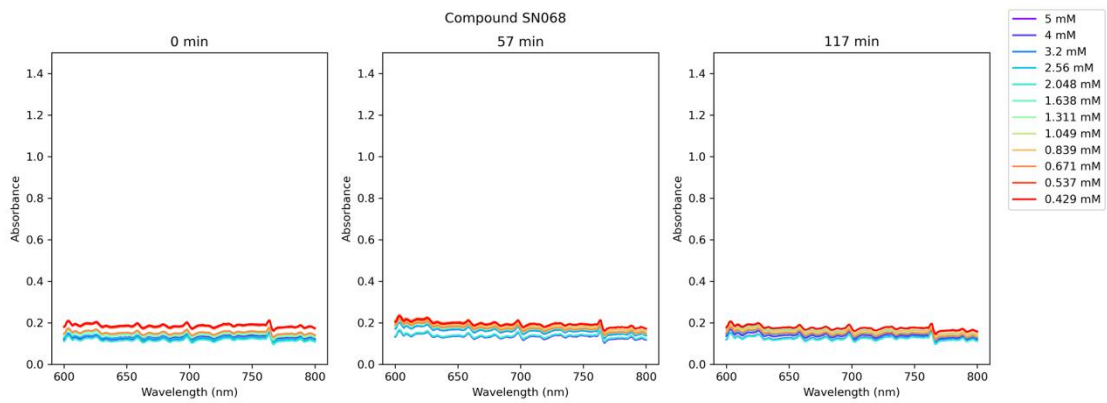

Figure S 3.71: Extinction spectra of the turbidimetric solubility assay after 0, 57, and 117 min for SN068.

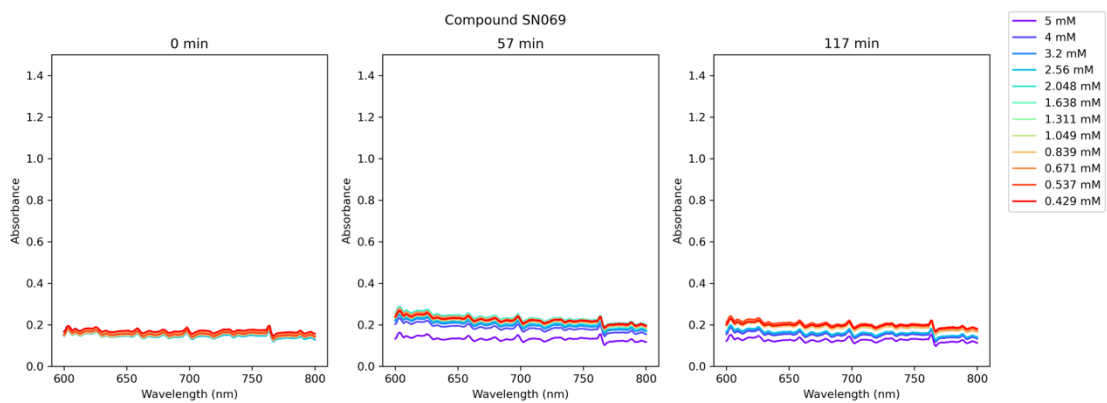

Figure S 3.72: Extinction spectra of the turbidimetric solubility assay after 0, 57, and 117 min for SN069.

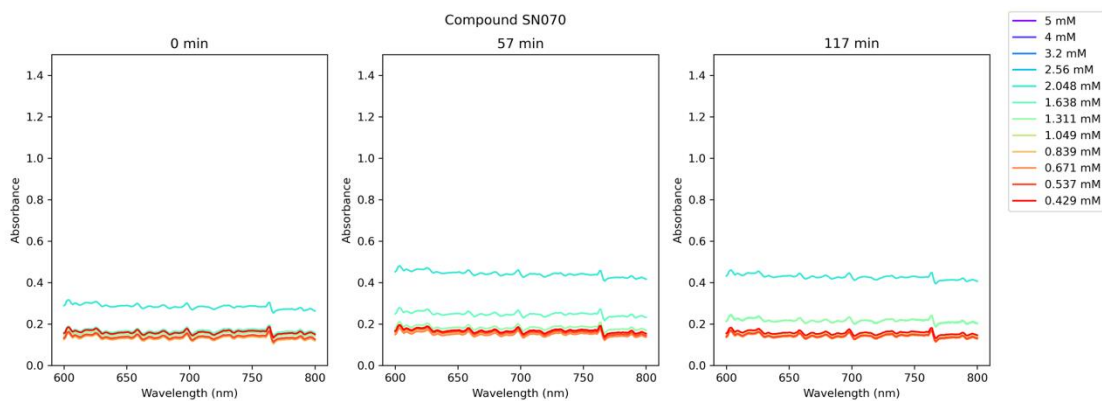

Figure S 3.73: Extinction spectra of the turbidimetric solubility assay after 0, 57, and 117 min for SN070.

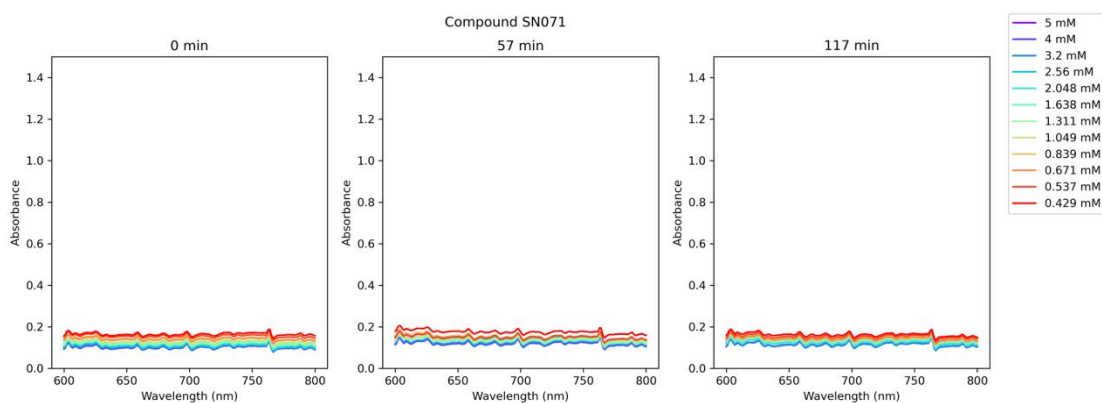

Figure S 3.74: Extinction spectra of the turbidimetric solubility assay after 0, 57, and 117 min for SN071.

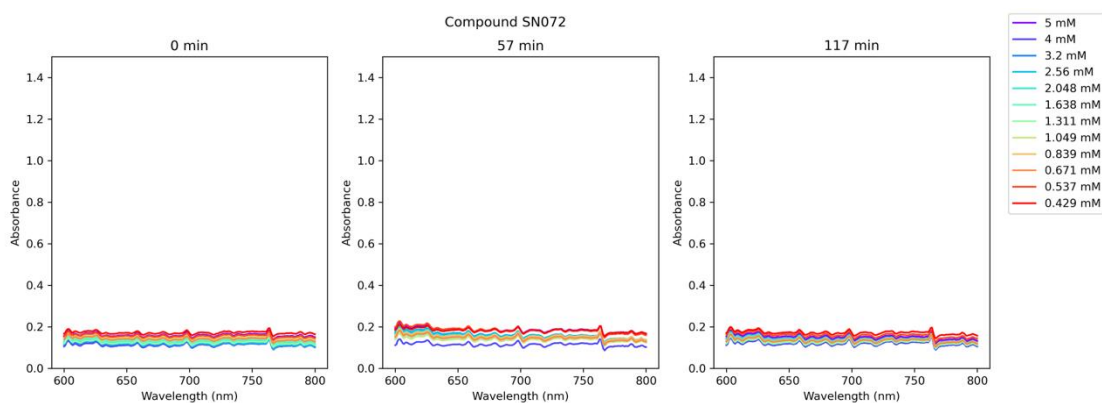

Figure S 3.75: Extinction spectra of the turbidimetric solubility assay after 0, 57, and 117 min for SN072.

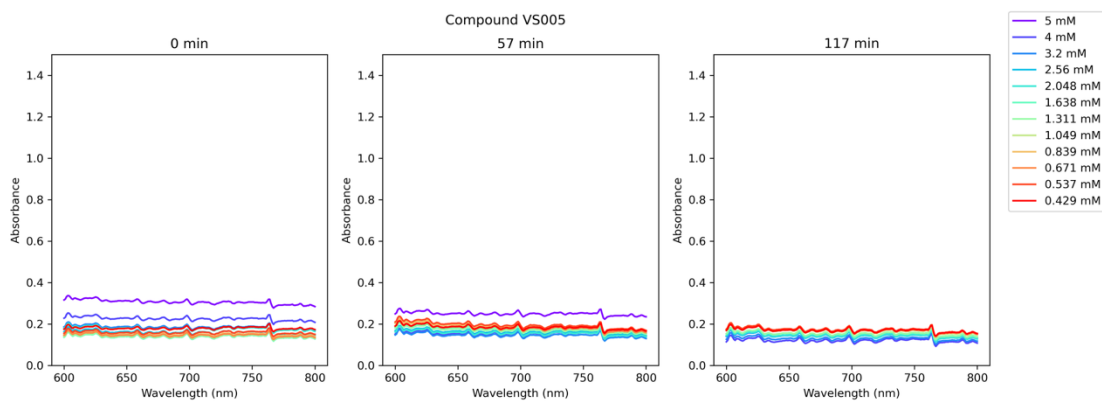

Figure S 3.76: Extinction spectra of the turbidimetric solubility assay after 0, 57, and 117 min for VS005.

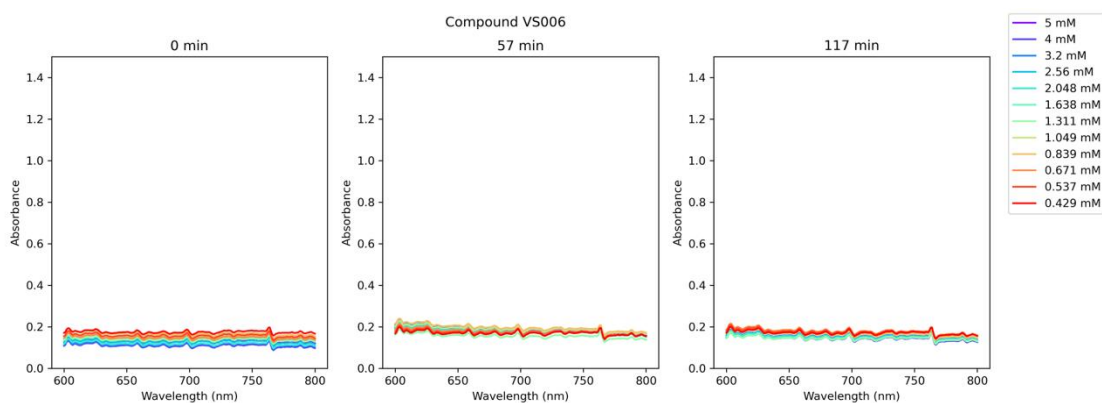

Figure S 3.77: Extinction spectra of the turbidimetric solubility assay after 0, 57, and 117 min for VS006.

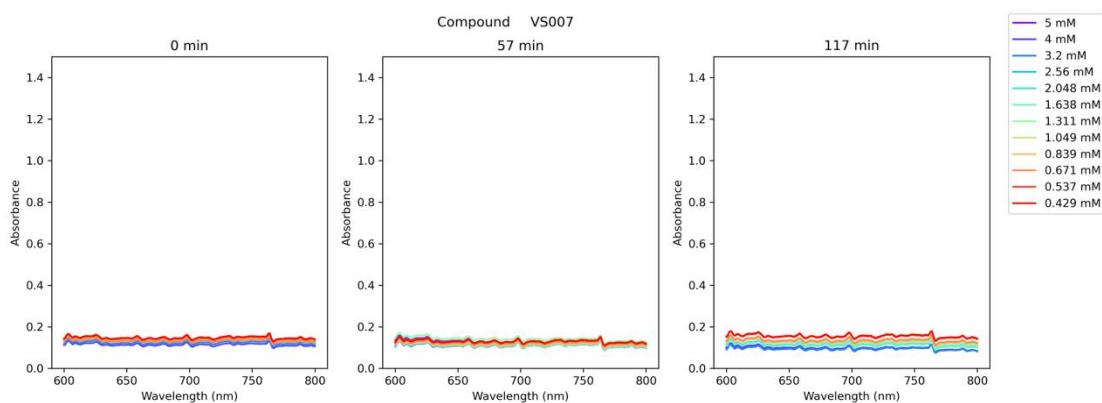

Figure S 3.78: Extinction spectra of the turbidimetric solubility assay after 0, 57, and 117 min for VS007.

## 4 DTNB Assay

### 4.1 Fit Results

Table S 4.1: Fit results of the DTNB Assay for AA001-SN035.

| Compound | Measurement 1                            |                   |                   |                   | Measurement 2     |                                          |                   |                   | Measurement 3     |                   |                                          |                   | Mean              |                   |                   |                                          |                   |
|----------|------------------------------------------|-------------------|-------------------|-------------------|-------------------|------------------------------------------|-------------------|-------------------|-------------------|-------------------|------------------------------------------|-------------------|-------------------|-------------------|-------------------|------------------------------------------|-------------------|
|          | $k_2$ [M <sup>-1</sup> s <sup>-1</sup> ] | Error             | B0 [μM]           | Error             | A0 [μM]           | $k_2$ [M <sup>-1</sup> s <sup>-1</sup> ] | Error             | B0 [μM]           | Error             | A0 [μM]           | $k_2$ [M <sup>-1</sup> s <sup>-1</sup> ] | Error             | B0 [μM]           | Error             | A0 [μM]           | $k_2$ [M <sup>-1</sup> s <sup>-1</sup> ] | Error             |
| AA001    | 0.02871                                  | 0.00263           | 50.0              | 0.0               | 104.8             | 0.01065                                  | 0.00269           | 50.0              | 0.0               | 94.9              | 0.01425                                  | 0.00488           | 50.0              | 0.0               | 94.7              | 0.01787                                  | 0.00491           |
| AA002    | -0.00878                                 | 0.00181           | 50.0              | 0.0               | 109.2             | 0.01091                                  | 0.00123           | 50.0              | 0.0               | 97.8              | -0.01216                                 | 0.00134           | 50.0              | 0.0               | 96.8              | -0.00334                                 | 0.00086           |
| AA003    | 0.01459                                  | 0.00234           | 50.0              | 0.0               | 103.9             | -0.00159                                 | 0.00105           | 50.0              | 0.0               | 92.2              | -0.01054                                 | 0.00161           | 50.0              | 0.0               | 94.9              | 0.00082                                  | 0.00101           |
| AA004    | 0.04130                                  | 0.00315           | 50.0              | 0.0               | 102.0             | 0.01124                                  | 0.00112           | 50.0              | 0.0               | 94.9              | 0.01410                                  | 0.00130           | 50.0              | 0.0               | 0.0               | 0.00214                                  | 0.00120           |
| AA005    | n.a. <sup>a</sup>                        | n.a. <sup>a</sup> | n.a. <sup>a</sup> | n.a. <sup>a</sup> | n.a. <sup>a</sup> | n.a. <sup>a</sup>                        | n.a. <sup>a</sup> | n.a. <sup>a</sup> | n.a. <sup>a</sup> | n.a. <sup>a</sup> | n.a. <sup>a</sup>                        | n.a. <sup>a</sup> | n.a. <sup>a</sup> | n.a. <sup>a</sup> | n.a. <sup>a</sup> | n.a. <sup>a</sup>                        | n.a. <sup>a</sup> |
| AA006    | 0.00430                                  | 0.00163           | 50.0              | 0.0               | 103.0             | 0.01713                                  | 0.00114           | 50.0              | 0.0               | 93.7              | 0.00187                                  | 0.00151           | 50.0              | 0.0               | 100.0             | 0.00777                                  | 0.00083           |
| AA007    | 0.00033                                  | 0.00093           | 50.0              | 0.0               | 99.4              | 0.02201                                  | 0.00222           | 50.0              | 0.0               | 101.1             | -0.00705                                 | 0.00114           | 50.0              | 0.0               | 97.8              | 0.00510                                  | 0.00089           |
| AA008    | 0.00000                                  | 0.00000           | 50.0              | 0.0               | 100.9             | 0.03155                                  | 0.00405           | 50.0              | 0.0               | 100.6             | -0.01984                                 | 0.00156           | 50.0              | 0.0               | 99.1              | 0.00390                                  | 0.00145           |
| CA006    | -0.00066                                 | 0.00139           | 50.0              | 0.0               | 102.1             | -0.00655                                 | 0.00179           | 50.0              | 0.0               | 97.8              | -0.00769                                 | 0.00146           | 50.0              | 0.0               | 96.8              | -0.00497                                 | 0.00090           |
| CA007    | -0.01513                                 | 0.00262           | 50.0              | 0.0               | 104.9             | 0.00817                                  | 0.00148           | 50.0              | 0.0               | 99.0              | 0.01229                                  | 0.00167           | 50.0              | 0.0               | 96.2              | 0.00178                                  | 0.00115           |
| CA008    | n.a. <sup>a</sup>                        | n.a. <sup>a</sup> | n.a. <sup>a</sup> | n.a. <sup>a</sup> | n.a. <sup>a</sup> | n.a. <sup>a</sup>                        | n.a. <sup>a</sup> | n.a. <sup>a</sup> | n.a. <sup>a</sup> | n.a. <sup>a</sup> | n.a. <sup>a</sup>                        | n.a. <sup>a</sup> | n.a. <sup>a</sup> | n.a. <sup>a</sup> | n.a. <sup>a</sup> | n.a. <sup>a</sup>                        | n.a. <sup>a</sup> |
| EO004    | -0.01121                                 | 0.00229           | 50.0              | 0.0               | 103.4             | 0.01628                                  | 0.00138           | 50.0              | 0.0               | 97.6              | -0.02992                                 | 0.00319           | 50.0              | 0.0               | 99.1              | -0.00828                                 | 0.00139           |
| EO005    | 0.02469                                  | 0.00206           | 50.0              | 0.0               | 104.5             | 0.00894                                  | 0.00199           | 50.0              | 0.0               | 100.6             | 0.00268                                  | 0.00177           | 50.0              | 0.0               | 100.6             | 0.01210                                  | 0.00112           |
| EO006    | -0.02040                                 | 0.00338           | 50.0              |                   | 97.9              | -0.01701                                 | 0.00324           | 50.0              | 0.0               | 101.3             | -0.03499                                 | 0.00396           | 50.0              | 0.0               | 100.5             | -0.02413                                 | 0.00204           |
| EO007    | n.a. <sup>b</sup>                        | n.a. <sup>b</sup> | n.a. <sup>b</sup> | n.a. <sup>b</sup> | n.a. <sup>b</sup> | n.a. <sup>b</sup>                        | n.a. <sup>b</sup> | n.a. <sup>b</sup> | n.a. <sup>b</sup> | n.a. <sup>b</sup> | n.a. <sup>b</sup>                        | n.a. <sup>b</sup> | n.a. <sup>b</sup> | n.a. <sup>b</sup> | n.a. <sup>b</sup> | n.a. <sup>b</sup>                        | n.a. <sup>b</sup> |
| EO008    | 0.00411                                  | 0.00108           | 50.0              | 0.0               | 110.8             | -0.00216                                 | 0.00121           | 50.0              | 0.0               | 98.4              | 0.00605                                  | 0.00179           | 50.0              | 0.0               | 102.0             | 0.00267                                  | 0.00081           |
| EO009    | -0.02232                                 | 0.00161           | 50.0              | 0.0               | 99.5              | 0.00229                                  | 0.00268           | 50.0              | 0.0               | 102.5             | -0.04725                                 | 0.00423           | 50.0              | 0.0               | 106.1             | -0.02243                                 | 0.00175           |
| EO010    | 0.00878                                  | 0.00169           | 50.0              | 0.0               | 99.3              | 0.00986                                  | 0.00149           | 50.0              | 0.0               | 101.0             | 0.02008                                  | 0.00173           | 50.0              | 0.0               | 100.3             | 0.01291                                  | 0.00095           |
| SN013    | -0.01652                                 | 0.00210           | 50.0              | 0.0               | 101.5             | -0.02043                                 | 0.00216           | 50.0              | 0.0               | 97.3              | 0.02698                                  | 0.00203           | 50.0              | 0.0               | 100.5             | -0.00332                                 | 0.00121           |
| SN014    | 0.01721                                  | 0.00390           | 50.0              | 0.0               | 110.5             | -0.01414                                 | 0.00212           | 50.0              | 0.0               | 97.5              | -0.01702                                 | 0.00284           | 50.0              | 0.0               | 101.5             | -0.00465                                 | 0.00176           |
| SN015    | 0.01177                                  | 0.00067           | 50.0              | 0.0               | 107.4             | 0.02929                                  | 0.00125           | 50.0              | 0.0               | 103.8             | 0.02032                                  | 0.00057           | 50.0              | 0.0               | 105.6             | 0.02481                                  | 0.00051           |
| SN016    | 0.18717                                  | 0.01014           | 50.0              | 0.0               | 105.3             | 0.21411                                  | 0.00975           | 50.0              | 0.0               | 102.2             | 0.28556                                  | 0.01114           | 50.0              | 0.0               | 100.9             | 0.22895                                  | 0.00598           |
| SN017    | 0.47423                                  | 0.00286           | 50.0              | 0.0               | 108.9             | 0.41466                                  | 0.00506           | 50.0              | 0.0               | 104.1             | 0.39638                                  | 0.01195           | 50.0              | 0.0               | 103.2             | 0.42842                                  | 0.00443           |
| SN018    | n.a. <sup>a</sup>                        | n.a. <sup>a</sup> | n.a. <sup>a</sup> | n.a. <sup>a</sup> | n.a. <sup>a</sup> | n.a. <sup>a</sup>                        | n.a. <sup>a</sup> | n.a. <sup>a</sup> | n.a. <sup>a</sup> | n.a. <sup>a</sup> | n.a. <sup>a</sup>                        | n.a. <sup>a</sup> | n.a. <sup>a</sup> | n.a. <sup>a</sup> | n.a. <sup>a</sup> | n.a. <sup>a</sup>                        | n.a. <sup>a</sup> |
| SN019    | 1.40327                                  | 0.03542           | 27.4              | 0.4               | 96.8              | 1.45550                                  | 0.05732           | 38.2              | 0.8               | 98.5              | 1.49397                                  | 0.03942           | 39.8              | 0.6               | 99.4              | 1.42939                                  | 0.02602           |
| SN020    | 0.02923                                  | 0.00126           | 50.0              | 0.0               | 106.8             | 0.01420                                  | 0.00097           | 50.0              | 0.0               | 99.7              | 0.01166                                  | 0.00054           | 50.0              | 0.0               | 104.6             | 0.01836                                  | 0.00056           |
| SN021    | -0.02276                                 | 0.00509           | 50.0              | 0.0               | 108.3             | -0.00891                                 | 0.00190           | 50.0              | 0.0               | 97.8              | -0.02175                                 | 0.00315           | 50.0              | 0.0               | 101.2             | -0.01781                                 | 0.00209           |
| SN022    | 0.08469                                  | 0.00289           | 50.0              | 0.0               | 111.0             | 0.09007                                  | 0.00298           | 50.0              | 0.0               | 95.0              | 0.09613                                  | 0.00390           | 50.0              | 0.0               | 95.5              | 0.09030                                  | 0.00190           |
| SN023    | -0.00190                                 | 0.00101           | 50.0              | 0.0               | 94.6              | 0.00842                                  | 0.00143           | 50.0              | 0.0               | 95.1              | -0.00568                                 | 0.00285           | 50.0              | 0.0               | 98.6              | 0.00028                                  | 0.00111           |
| SN024    | 0.02142                                  | 0.00317           | 50.0              | 0.0               | 111.1             | 0.02247                                  | 0.00191           | 50.0              | 0.0               | 96.8              | 0.00902                                  | 0.00156           | 50.0              | 0.0               | 96.2              | 0.01764                                  | 0.00134           |
| SN025    | 0.00011                                  | 0.00118           | 50.0              | 0.0               | 103.9             | -0.00065                                 | 0.00070           | 50.0              | 0.0               | 96.0              | -0.00426                                 | 0.00102           | 50.0              | 0.0               | 95.1              | -0.00160                                 | 0.00057           |
| SN026    | 0.03544                                  | 0.00212           | 50.0              | 0.0               | 106.0             | 0.05318                                  | 0.00314           | 50.0              | 0.0               | 104.7             | 0.02948                                  | 0.00190           | 50.0              | 0.0               | 101.5             | 0.03937                                  | 0.00141           |
| SN027    | 0.11311                                  | 0.00192           | 50.0              | 0.0               | 104.1             | 0.08121                                  | 0.00190           | 50.0              | 0.0               | 98.9              | -0.03366                                 | 0.00133           | 50.0              | 0.0               | 118.6             | 0.00190                                  | 0.00100           |
| SN028    | n.a. <sup>a</sup>                        | n.a. <sup>a</sup> | n.a. <sup>a</sup> | n.a. <sup>a</sup> | n.a. <sup>a</sup> | n.a. <sup>a</sup>                        | n.a. <sup>a</sup> | n.a. <sup>a</sup> | n.a. <sup>a</sup> | n.a. <sup>a</sup> | n.a. <sup>a</sup>                        | n.a. <sup>a</sup> | n.a. <sup>a</sup> | n.a. <sup>a</sup> | n.a. <sup>a</sup> | n.a. <sup>a</sup>                        | n.a. <sup>a</sup> |
| SN029    | 0.00994                                  | 0.00095           | 50.0              | 0.0               | 108.6             | 0.00827                                  | 0.00209           | 50.0              | 0.0               | 99.8              | -0.00330                                 | 0.00060           | 50.0              | 0.0               | 101.0             | 0.00497                                  | 0.00079           |
| SN030    | 0.03839                                  | 0.00415           | 50.0              | 0.0               | 115.2             | 0.01128                                  | 0.00339           | 50.0              | 0.0               | 99.4              | 0.01659                                  | 0.00333           | 50.0              | 0.0               | 100.0             | 0.02209                                  | 0.00210           |
| SN031    | n.a. <sup>a</sup>                        | n.a. <sup>a</sup> | n.a. <sup>a</sup> | n.a. <sup>a</sup> | n.a. <sup>a</sup> | n.a. <sup>a</sup>                        | n.a. <sup>a</sup> | n.a. <sup>a</sup> | n.a. <sup>a</sup> | n.a. <sup>a</sup> | n.a. <sup>a</sup>                        | n.a. <sup>a</sup> | n.a. <sup>a</sup> | n.a. <sup>a</sup> | n.a. <sup>a</sup> | n.a. <sup>a</sup>                        | n.a. <sup>a</sup> |
| SN032    | n.a. <sup>a</sup>                        | n.a. <sup>a</sup> | n.a. <sup>a</sup> | n.a. <sup>a</sup> | n.a. <sup>a</sup> | n.a. <sup>a</sup>                        | n.a. <sup>a</sup> | n.a. <sup>a</sup> | n.a. <sup>a</sup> | n.a. <sup>a</sup> | n.a. <sup>a</sup>                        | n.a. <sup>a</sup> | n.a. <sup>a</sup> | n.a. <sup>a</sup> | n.a. <sup>a</sup> | n.a. <sup>a</sup>                        | n.a. <sup>a</sup> |
| SN033    | 0.02928                                  | 0.00136           | 50.0              | 0.0               | 113.4             | 0.01467                                  | 0.00130           | 50.0              | 0.0               | 105.2             | 0.03462                                  | 0.00211           | 50.0              | 0.0               | 103.3             | 0.02619                                  | 0.00094           |
| SN034    | n.a. <sup>b</sup>                        | n.a. <sup>b</sup> | n.a. <sup>b</sup> | n.a. <sup>b</sup> | n.a. <sup>b</sup> | n.a. <sup>b</sup>                        | n.a. <sup>b</sup> | n.a. <sup>b</sup> | n.a. <sup>b</sup> | n.a. <sup>b</sup> | n.a. <sup>b</sup>                        | n.a. <sup>b</sup> | n.a. <sup>b</sup> | n.a. <sup>b</sup> | n.a. <sup>b</sup> | n.a. <sup>b</sup>                        | n.a. <sup>b</sup> |
| SN035    | 0.01106                                  | 0.00055           | 50.0              | 0.0               | 106.8             | 0.01544                                  | 0.00104           | 50.0              | 0.0               | 101.5             | 0.00845                                  | 0.00402           | 50.0              | 0.0               | 102.7             | 0.01165                                  | 0.00140           |

<sup>a</sup> 3.33 mM ACN stock not soluble. <sup>b</sup> The purity of the compound could not be confirmed.

Table S 4.2: Fit results of the DTNB Assay for SN036-VS007.

| Compound | Measurement 1                            |                   |                   |                   |                   | Measurement 2                            |                   |                   |                   |                   | Measurement 3                            |                   |                   |                   |                   | Mean                                     |                   |
|----------|------------------------------------------|-------------------|-------------------|-------------------|-------------------|------------------------------------------|-------------------|-------------------|-------------------|-------------------|------------------------------------------|-------------------|-------------------|-------------------|-------------------|------------------------------------------|-------------------|
|          | $k_2$ [M <sup>-1</sup> s <sup>-1</sup> ] | Error             | B0 [μM]           | Error             | A0 [μM]           | $k_2$ [M <sup>-1</sup> s <sup>-1</sup> ] | Error             | B0 [μM]           | Error             | A0 [μM]           | $k_2$ [M <sup>-1</sup> s <sup>-1</sup> ] | Error             | B0 [μM]           | Error             | A0 [μM]           | $k_2$ [M <sup>-1</sup> s <sup>-1</sup> ] | Error             |
| SN036    | 0.00012                                  | 0.00189           | 50.0              | 0.0               | 104.3             | 0.03665                                  | 0.00232           | 50.0              | 0.0               | 110.9             | 0.00911                                  | 0.00138           | 50.0              | 0.0               | 105.7             | 0.01529                                  | 0.00110           |
| SN037    | 0.02408                                  | 0.00130           | 50.0              | 0.0               | 108.7             | 0.01422                                  | 0.00081           | 50.0              | 0.0               | 105.3             | 0.06520                                  | 0.00144           | 50.0              | 0.0               | 104.0             | 0.03450                                  | 0.00070           |
| SN038    | 0.02771                                  | 0.00046           | 50.0              | 0.0               | 101.2             | 0.04480                                  | 0.00074           | 50.0              | 0.0               | 99.7              | 0.05543                                  | 0.00107           | 50.0              | 0.0               | 98.9              | 0.04265                                  | 0.00046           |
| SN039    | 0.25290                                  | 0.00339           | 50.0              | 0.0               | 106.8             | 0.16800                                  | 0.00250           | 50.0              | 0.0               | 102.2             | 0.17292                                  | 0.00236           | 50.0              | 0.0               | 105.4             | 0.19794                                  | 0.00161           |
| SN040    | 0.00738                                  | 0.00071           | 50.0              | 0.0               | 115.1             | 0.02013                                  | 0.00160           | 50.0              | 0.0               | 105.1             | -0.04004                                 | 0.00262           | 50.0              | 0.0               | 105.7             | -0.00418                                 | 0.00105           |
| SN041    | -0.00012                                 | 0.00145           | 50.0              | 0.0               | 111.6             | 0.00631                                  | 0.00074           | 50.0              | 0.0               | 100.8             | -0.01304                                 | 0.00206           | 50.0              | 0.0               | 104.1             | -0.00228                                 | 0.00088           |
| SN042    | 0.00496                                  | 0.00176           | 50.0              | 0.0               | 101.1             | 0.02136                                  | 0.00095           | 50.0              | 0.0               | 107.2             | 0.05912                                  | 0.00103           | 50.0              | 0.0               | 108.7             | 0.02848                                  | 0.00075           |
| SN043    | 0.02894                                  | 0.00150           | 50.0              | 0.0               | 107.7             | 0.01603                                  | 0.00109           | 50.0              | 0.0               | 106.3             | 0.02064                                  | 0.00102           | 50.0              | 0.0               | 105.5             | 0.02187                                  | 0.00071           |
| SN044    | n.a. <sup>a</sup>                        | n.a. <sup>a</sup> | n.a. <sup>a</sup> | n.a. <sup>a</sup> | n.a. <sup>a</sup> | n.a. <sup>a</sup>                        | n.a. <sup>a</sup> | n.a. <sup>a</sup> | n.a. <sup>a</sup> | n.a. <sup>a</sup> | n.a. <sup>a</sup>                        | n.a. <sup>a</sup> | n.a. <sup>a</sup> | n.a. <sup>a</sup> | n.a. <sup>a</sup> | n.a. <sup>a</sup>                        | n.a. <sup>a</sup> |
| SN045    | 0.03449                                  | 0.00064           | 50.0              | 0.0               | 101.5             | 0.04280                                  | 0.00063           | 50.0              | 0.0               | 99.6              | 0.05026                                  | 0.00076           | 50.0              | 0.0               | 98.6              | 0.04252                                  | 0.00039           |
| SN046    | 0.00471                                  | 0.00070           | 50.0              | 0.0               | 100.4             | 0.06820                                  | 0.00130           | 50.0              | 0.0               | 98.3              | 0.02458                                  | 0.00119           | 50.0              | 0.0               | 97.1              | 0.03250                                  | 0.00063           |
| SN047    | 0.02079                                  | 0.00109           | 50.0              | 0.0               | 108.3             | 0.00832                                  | 0.00073           | 50.0              | 0.0               | 103.5             | 0.00718                                  | 0.00052           | 50.0              | 0.0               | 102.4             | 0.00775                                  | 0.00030           |
| SN048    | 0.20434                                  | 0.00279           | 50.0              | 0.0               | 97.7              | 0.19438                                  | 0.00232           | 50.0              | 0.0               | 94.8              | 0.24855                                  | 0.00192           | 50.0              | 0.0               | 94.5              | 0.21576                                  | 0.00137           |
| SN049    | n.a. <sup>a</sup>                        | n.a. <sup>a</sup> | n.a. <sup>a</sup> | n.a. <sup>a</sup> | n.a. <sup>a</sup> | n.a. <sup>a</sup>                        | n.a. <sup>a</sup> | n.a. <sup>a</sup> | n.a. <sup>a</sup> | n.a. <sup>a</sup> | n.a. <sup>a</sup>                        | n.a. <sup>a</sup> | n.a. <sup>a</sup> | n.a. <sup>a</sup> | n.a. <sup>a</sup> | n.a. <sup>a</sup>                        | n.a. <sup>a</sup> |
| SN050    | 1.99865                                  | 0.13690           | 26.2              | 0.0               | 93.2              | 2.36202                                  | 0.10761           | 28.2              | 0.0               | 93.0              | 2.74157                                  | 0.10621           | 26.7              | 0.0               | 88.6              | 2.36741                                  | 0.06799           |
| SN051    | 0.00576                                  | 0.00082           | 50.0              | 0.0               | 96.1              | 0.00696                                  | 0.00047           | 50.0              | 0.0               | 91.1              | 0.02977                                  | 0.00147           | 50.0              | 0.0               | 91.0              | 0.01416                                  | 0.00058           |
| SN052    | 0.02492                                  | 0.00121           | 50.0              | 0.0               | 94.3              | 0.01122                                  | 0.00045           | 50.0              | 0.0               | 94.2              | 0.01127                                  | 0.00049           | 50.0              | 0.0               | 91.6              | 0.01580                                  | 0.00046           |
| SN053    | n.a. <sup>a</sup>                        | n.a. <sup>a</sup> | n.a. <sup>a</sup> | n.a. <sup>a</sup> | n.a. <sup>a</sup> | n.a. <sup>a</sup>                        | n.a. <sup>a</sup> | n.a. <sup>a</sup> | n.a. <sup>a</sup> | n.a. <sup>a</sup> | n.a. <sup>a</sup>                        | n.a. <sup>a</sup> | n.a. <sup>a</sup> | n.a. <sup>a</sup> | n.a. <sup>a</sup> | n.a. <sup>a</sup>                        | n.a. <sup>a</sup> |
| SN054    | 0.14245                                  | 0.00364           | 50.0              | 0.0               | 86.8              | 0.12470                                  | 0.00328           | 50.0              | 0.0               | 81.5              | 0.09583                                  | 0.00305           | 50.0              | 0.0               | 83.5              | 0.12099                                  | 0.00192           |
| SN055    | 0.01383                                  | 0.00129           | 50.0              | 0.0               | 86.7              | 0.01864                                  | 0.00086           | 50.0              | 0.0               | 87.7              | 0.01314                                  | 0.00093           | 50.0              | 0.0               | 84.7              | 0.01520                                  | 0.00060           |
| SN056    | 0.01655                                  | 0.00140           | 50.0              | 0.0               | 109.6             | 0.01874                                  | 0.00078           | 50.0              | 0.0               | 104.1             | 0.01038                                  | 0.00055           | 50.0              | 0.0               | 100.5             | 0.01522                                  | 0.00056           |
| SN057    | 0.03956                                  | 0.00141           | 50.0              | 0.0               | 82.4              | 0.01734                                  | 0.00117           | 50.0              | 0.0               | 81.2              | 0.01762                                  | 0.00095           | 50.0              | 0.0               | 81.7              | 0.02484                                  | 0.00069           |
| SN058    | 0.00358                                  | 0.00059           | 50.0              |                   | 101.8             | -0.02176                                 | 0.00164           | 50.0              | 0.0               | 102.1             | 0.02480                                  | 0.00148           | 50.0              | 0.0               | 0.0               | 0.00221                                  | 0.00076           |
| SN059    | 0.02614                                  | 0.00196           | 50.0              | 0.0               | 107.1             | 0.03584                                  | 0.00207           | 50.0              | 0.0               | 105.9             | 0.03532                                  | 0.00234           | 50.0              | 0.0               | 104.3             | 0.03243                                  | 0.00123           |
| SN060    | 1.71617                                  | 0.01281           | 50.0              | 0.0               | 115.2             | 0.98475                                  | 0.02525           | 50.0              | 0.0               | 102.5             | 1.40847                                  | 0.00767           | 50.0              | 0.0               | 113.1             | 1.36980                                  | 0.00978           |
| SN061    | n.a. <sup>a</sup>                        | n.a. <sup>a</sup> | n.a. <sup>a</sup> | n.a. <sup>a</sup> | n.a. <sup>a</sup> | n.a. <sup>a</sup>                        | n.a. <sup>a</sup> | n.a. <sup>a</sup> | n.a. <sup>a</sup> | n.a. <sup>a</sup> | n.a. <sup>a</sup>                        | n.a. <sup>a</sup> | n.a. <sup>a</sup> | n.a. <sup>a</sup> | n.a. <sup>a</sup> | n.a. <sup>a</sup>                        | n.a. <sup>a</sup> |
| SN062    | 0.03175                                  | 0.00218           | 50.0              | 0.0               | 108.1             | 0.02201                                  | 0.00189           | 50.0              | 0.0               | 109.1             | 0.02654                                  | 0.00192           | 50.0              | 0.0               | 108.4             | 0.02677                                  | 0.00116           |
| SN063    | 0.03789                                  | 0.00191           | 50.0              |                   | 125.3             | 0.02670                                  | 0.00159           | 50.0              |                   | 124.7             | 0.04190                                  | 0.00177           | 50.0              |                   | 122.6             | 0.03550                                  | 0.00102           |
| SN064    | 0.16945                                  | 0.00309           | 50.0              | 0.0               | 131.8             | 0.12725                                  | 0.00290           | 50.0              | 0.0               | 130.2             | 0.13592                                  | 0.00313           | 50.0              | 0.0               | 128.9             | 0.14421                                  | 0.00176           |
| SN065    | 0.01316                                  | 0.00111           | 50.0              | 0.0               | 81.9              | -0.00520                                 | 0.00164           | 50.0              | 0.0               | 78.9              | n.a. <sup>c</sup>                        | n.a. <sup>c</sup> | n.a. <sup>c</sup> | n.a. <sup>c</sup> | n.a. <sup>c</sup> | n.a. <sup>c</sup>                        | n.a. <sup>c</sup> |
| SN066    | n.a. <sup>b</sup>                        | n.a. <sup>b</sup> | n.a. <sup>b</sup> | n.a. <sup>b</sup> | n.a. <sup>b</sup> | n.a. <sup>b</sup>                        | n.a. <sup>b</sup> | n.a. <sup>b</sup> | n.a. <sup>b</sup> | n.a. <sup>b</sup> | n.a. <sup>b</sup>                        | n.a. <sup>b</sup> | n.a. <sup>b</sup> | n.a. <sup>b</sup> | n.a. <sup>b</sup> | n.a. <sup>b</sup>                        | n.a. <sup>b</sup> |
| SN067    | 0.04477                                  | 0.00105           | 50.0              | 0.0               | 76.3              | 0.02141                                  | 0.00068           | 50.0              | 0.0               | 77.5              | 0.02768                                  | 0.00086           | 50.0              | 0.0               | 76.8              | 0.03129                                  | 0.00051           |
| SN068    | -0.00606                                 | 0.00100           | 50.0              | 0.0               | 97.8              | -0.01477                                 | 0.00113           | 50.0              | 0.0               | 98.2              | -0.01267                                 | 0.00211           | 50.0              | 0.0               | 106.5             | -0.01117                                 | 0.00086           |
| SN069    | 6.77675                                  | 0.14173           | 19.2              | 0.1               | 93.8              | 6.46697                                  | 0.19235           | 26.2              | 0.2               | 92.0              | 8.33206                                  | 0.11152           | 28.3              | 0.1               | 94.5              | 7.19193                                  | 0.08789           |
| SN070    | 0.03356                                  | 0.00189           | 50.0              | 0.0               | 123.0             | 0.02959                                  | 0.00189           | 50.0              | 0.0               | 122.8             | 0.03136                                  | 0.00201           | 50.0              |                   | 121.4             | 0.03150                                  | 0.00111           |
| SN071    | 0.01692                                  | 0.00107           | 50.0              | 0.0               | 80.2              | 0.02171                                  | 0.00130           | 50.0              | 0.0               | 75.5              | 0.01882                                  | 0.00091           | 50.0              | 0.0               | 79.8              | 0.01915                                  | 0.00064           |
| SN072    | -0.00203                                 | 0.00128           | 50.0              | 0.0               | 82.6              | 0.00060                                  | 0.00140           | 50.0              | 0.0               | 79.5              | 0.00807                                  | 0.00121           | 50.0              | 0.0               | 77.5              | 0.00221                                  | 0.00075           |
| VS005    | -0.01163                                 | 0.00066           | 50.0              | 0.0               | 98.5              | 0.00811                                  | 0.00121           | 50.0              | 0.0               | 100.8             | -0.02060                                 | 0.00219           | 50.0              | 0.0               | 105.1             | -0.00804                                 | 0.00086           |
| VS006    | 0.01991                                  | 0.00239           | 50.0              | 0.0               | 101.5             | 0.01026                                  | 0.00200           | 50.0              | 0.0               | 101.2             | -0.00067                                 | 0.00191           | 50.0              | 0.0               | 111.5             | 0.00983                                  | 0.00122           |
| VS007    | 0.13415                                  | 0.00454           | 50.0              | 0.0               | 130.6             | 0.35883                                  | 0.00910           | 50.0              | 0.0               | 126.4             | 0.24701                                  | 0.00750           | 50.0              | 0.0               | 126.0             | 0.24666                                  | 0.00421           |

<sup>a</sup> 3.33 mM ACN stock not soluble. <sup>b</sup> The purity of the compound could not be confirmed. <sup>c</sup> one triplicate was not evaluable.

## 4.2 Plots from the DTNB Assay

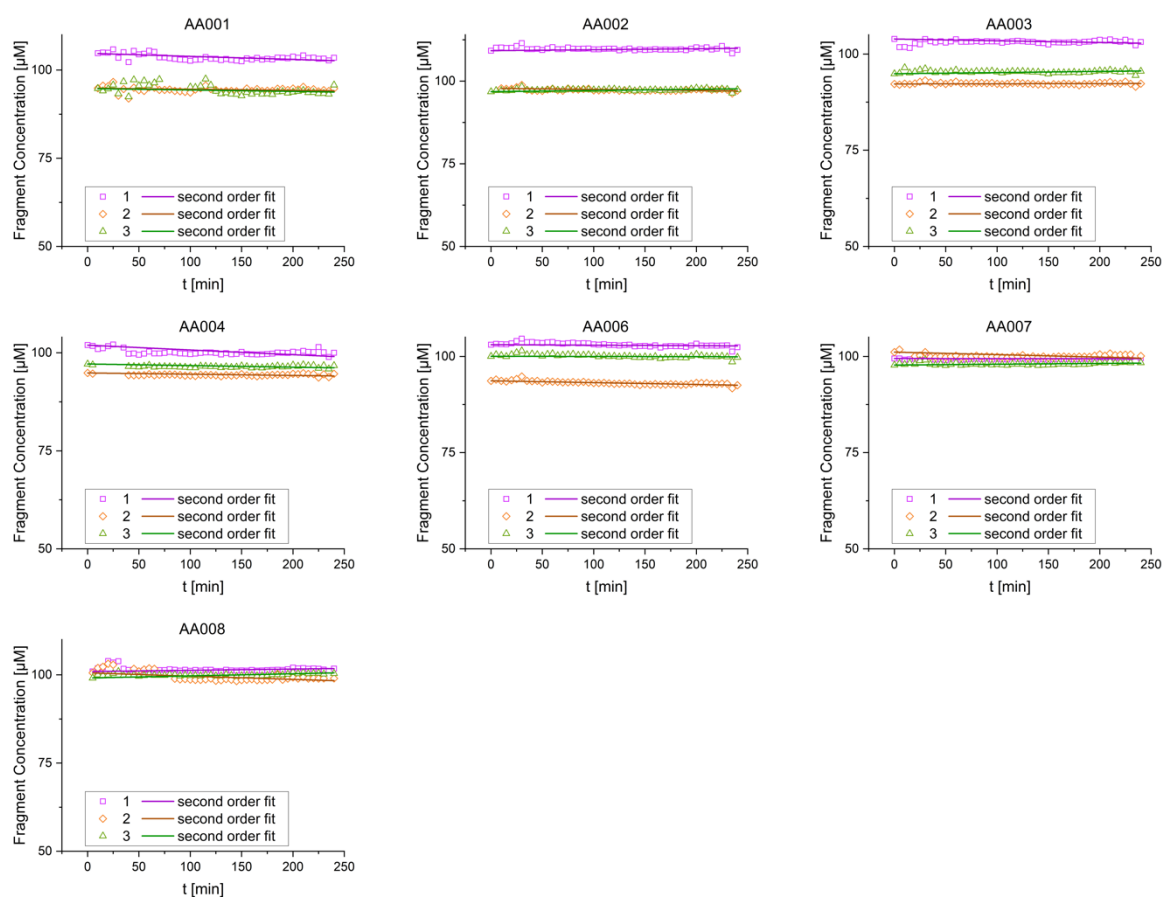

Figure S 4.1: Time-dependent depletion of the acrylamide fragments with DTNB.

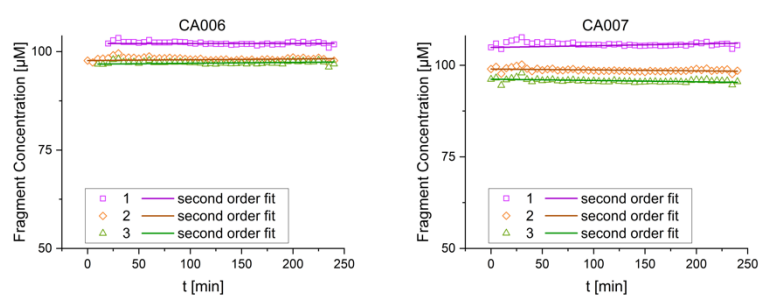

Figure S 4.2: Time-dependent depletion of the  $\alpha$ -cyano acrylamide fragments with DTNB.

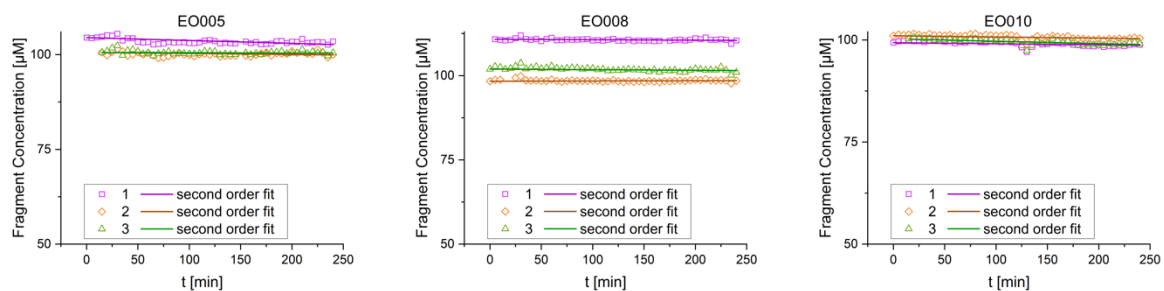

Figure S 4.3: Time-dependent depletion of the epoxide fragments with DTNB.

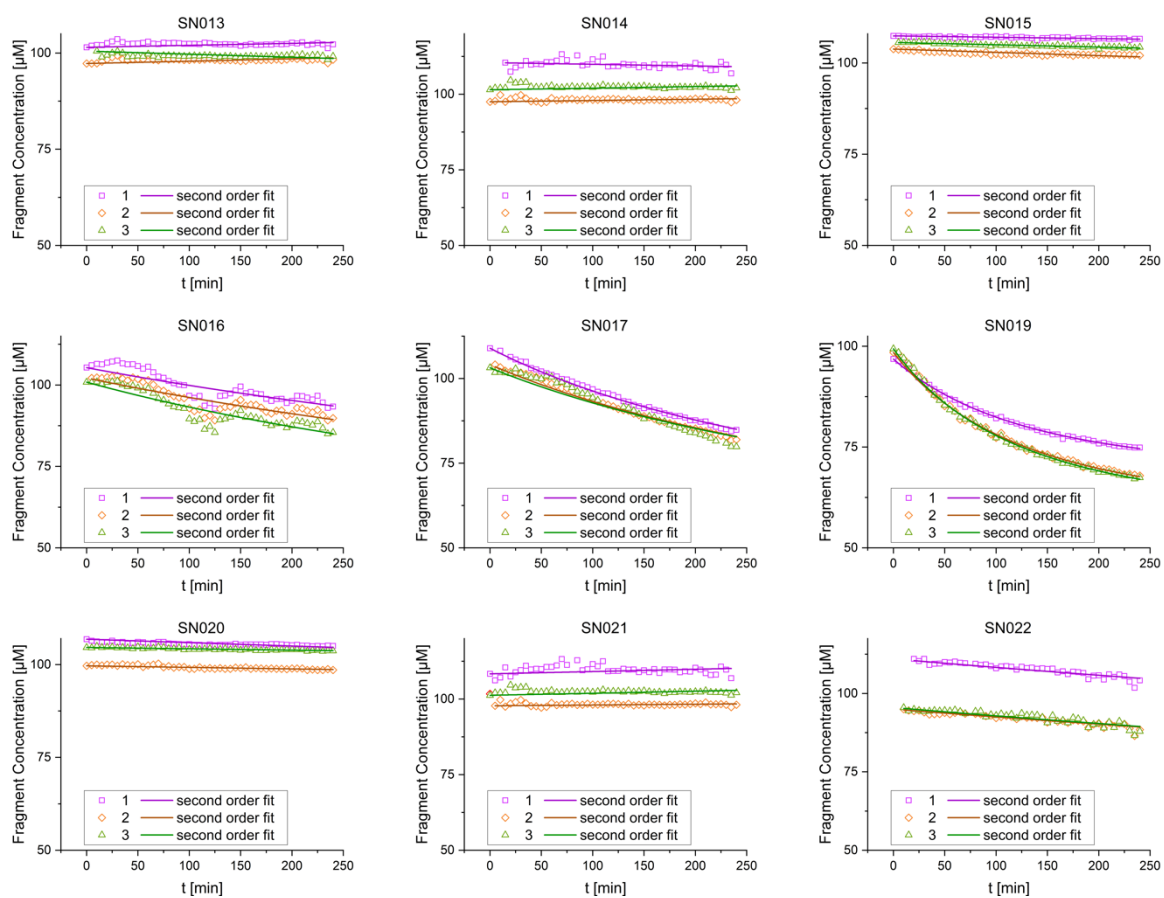

Figure S 4.4: Time-dependent depletion of the  $S_NAr$ -reactive heteroarenes SN013-SN022 with DTNB.

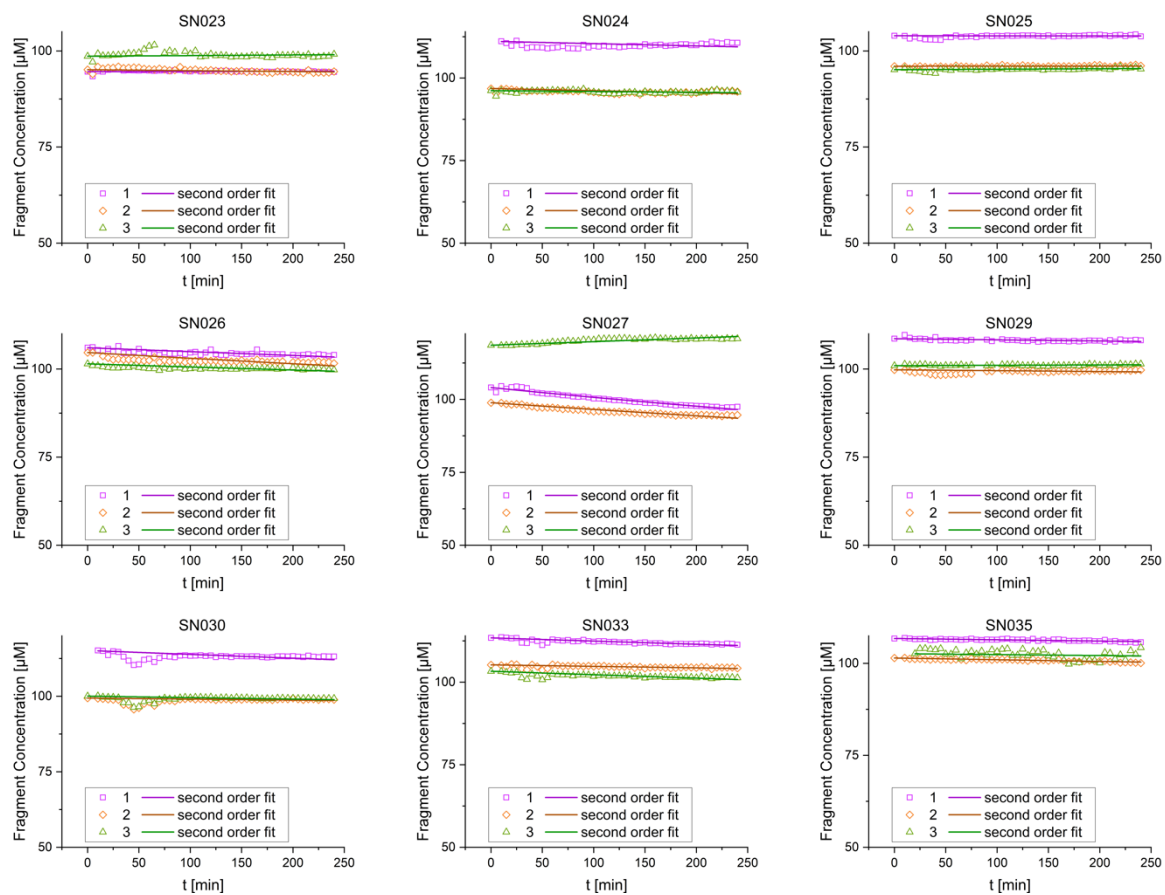

Figure S 4.5: Time-dependent depletion of the  $S_NAr$ -reactive heteroarenes SN023-SN035 with DTNB.

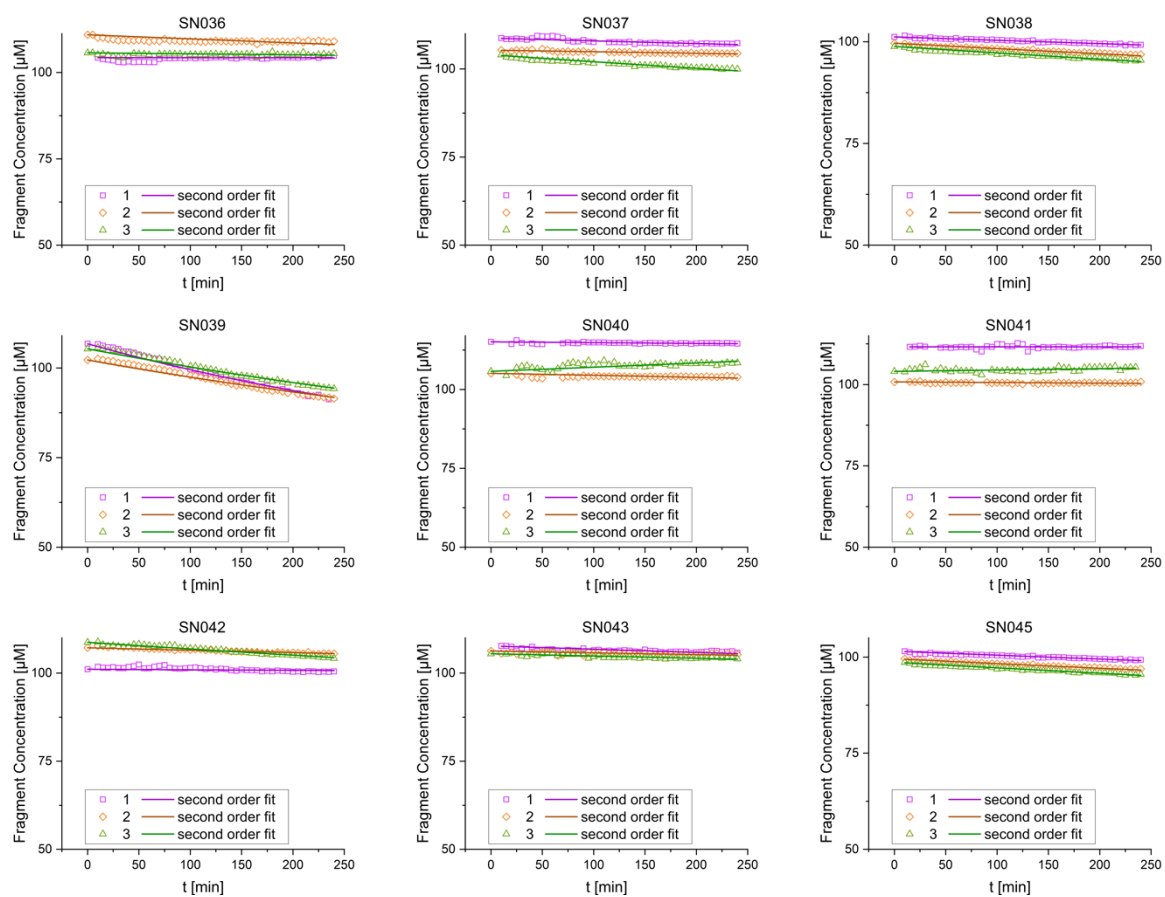

Figure S 4.6: Time-dependent depletion of the  $S_NAr$ -reactive heteroarenes SN036-SN045 with DTNB.

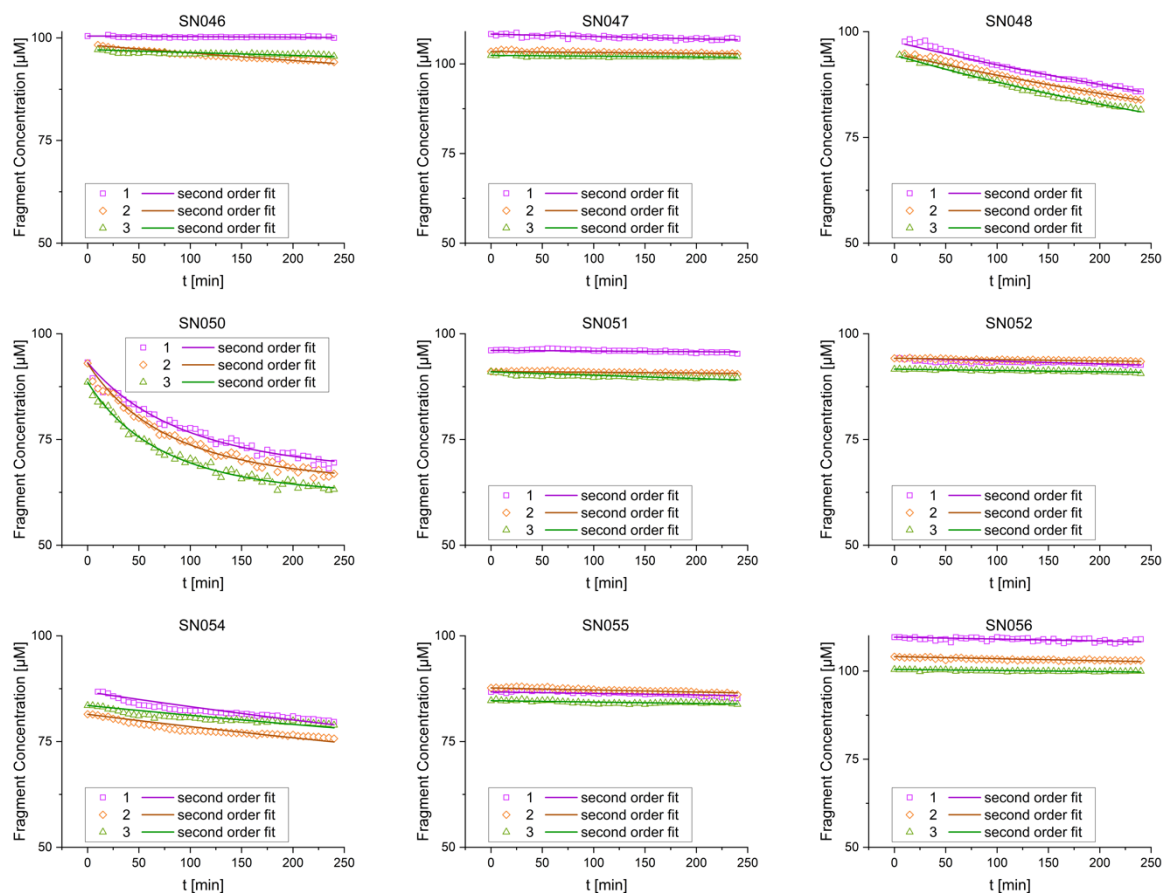

Figure S 4.7: Time-dependent depletion of the  $S_NAr$ -reactive heteroarenes SN046-SN056 with DTNB.

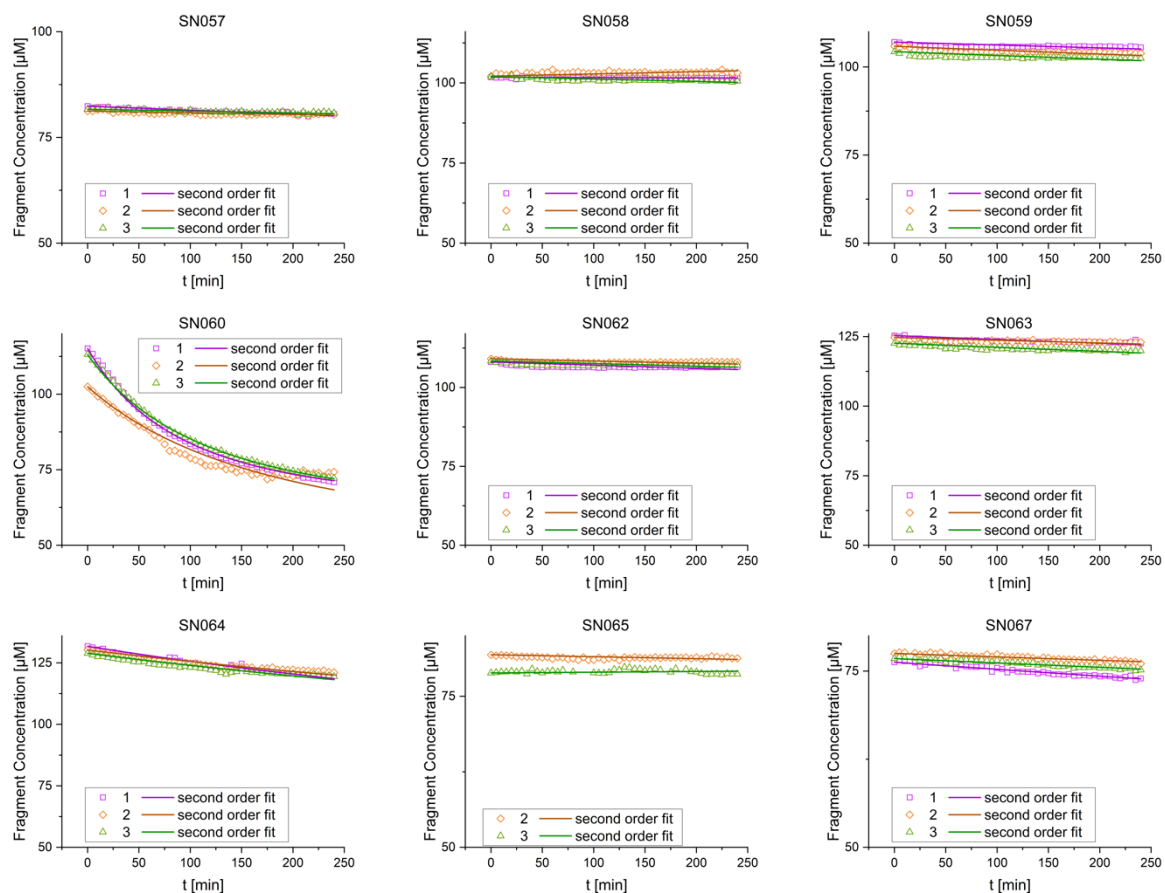

Figure S 4.8: Time-dependent depletion of the  $S_NAr$ -reactive heteroarenes SN057-SN067 with DTNB.

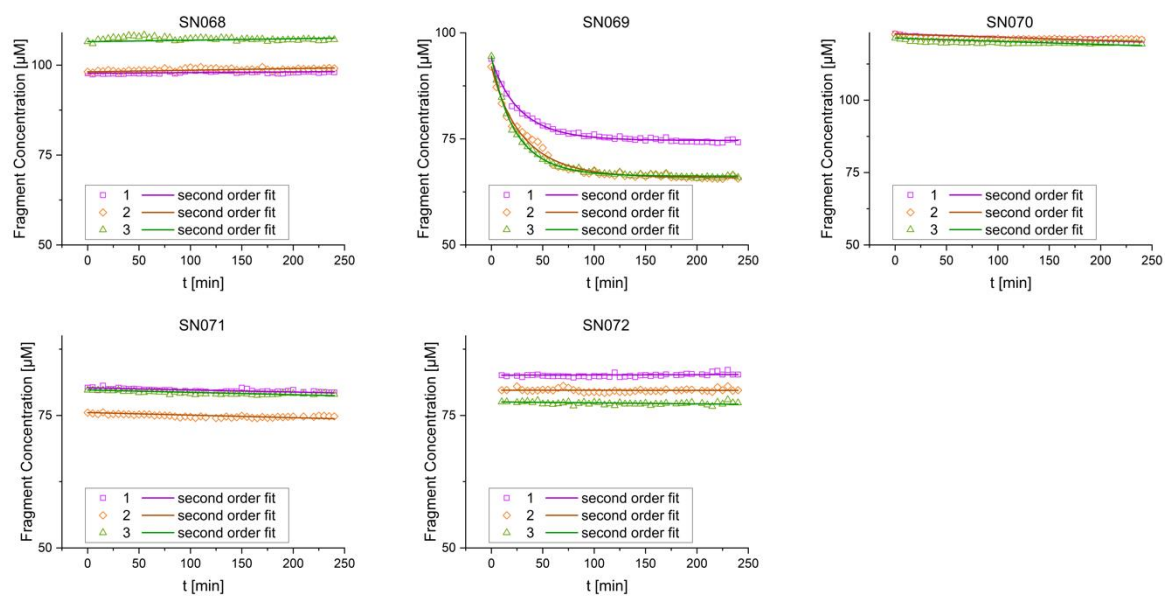

Figure S 4.9: Time-dependent depletion of the  $S_NAr$ -reactive heteroarenes SN067-SN072 with DTNB.

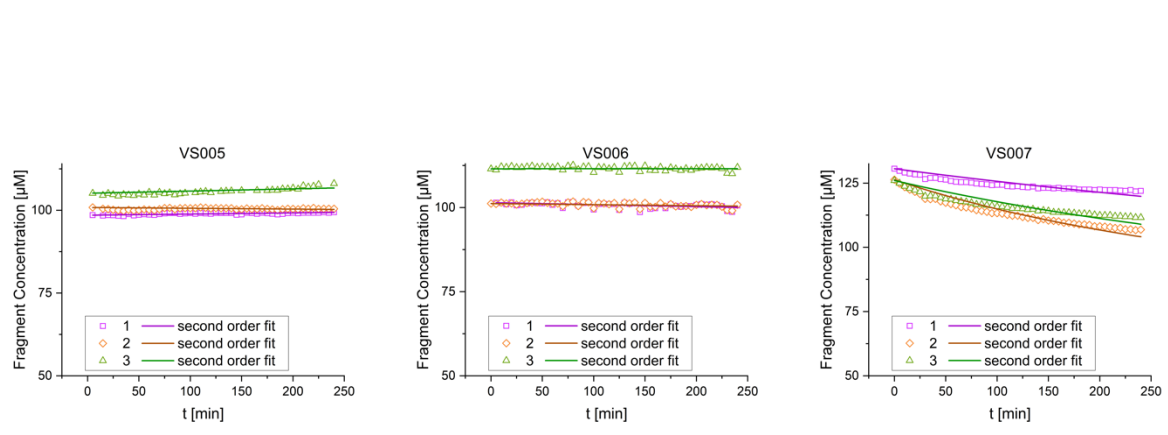

Figure S 4.10: Time-dependent depletion of the vinyl sulfone fragments with DTNB.

## 5 GSH Assay

### 5.1 Plots from the GSH Assay

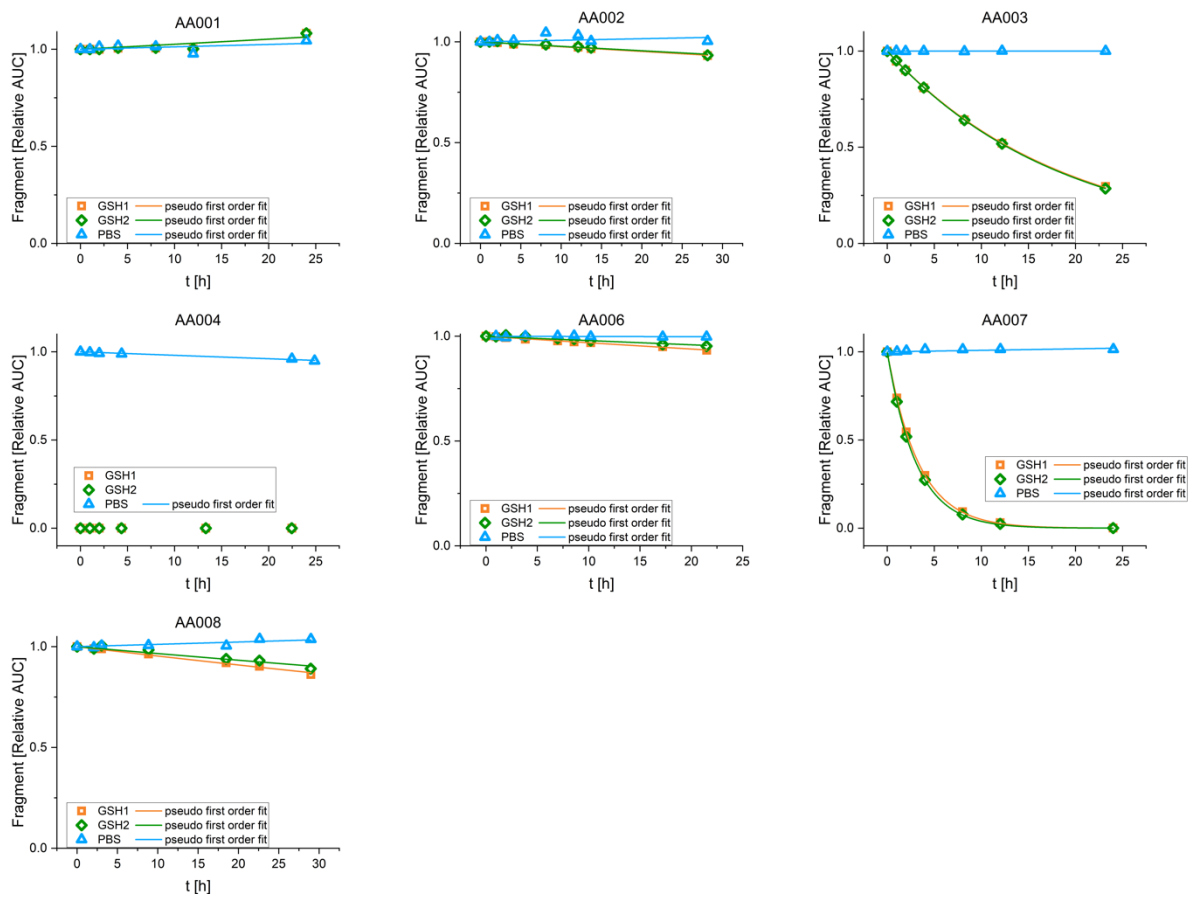

Figure S 5.1: Time-dependent depletion of the acrylamide fragments with GSH and reference measurement in PBS.

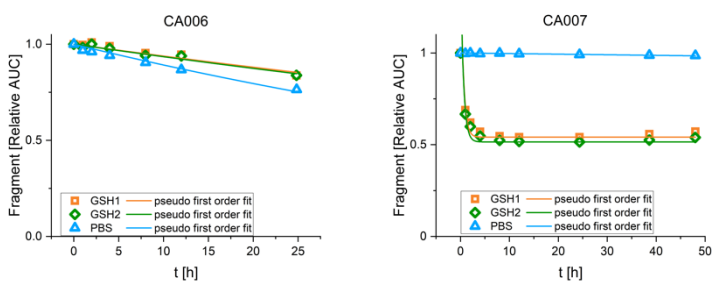

Figure S 5.2: Time-dependent depletion of the  $\alpha$ -cyano acrylamide fragments with GSH and reference measurement in PBS.

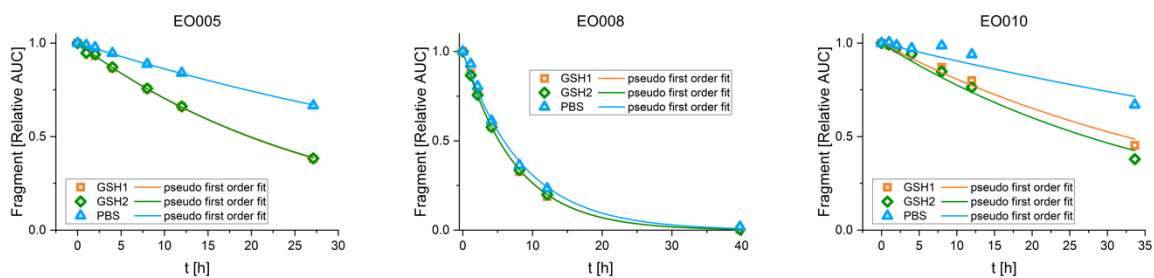

Figure S 5.3: Time-dependent depletion of the epoxide fragments with GSH and reference measurement in PBS.

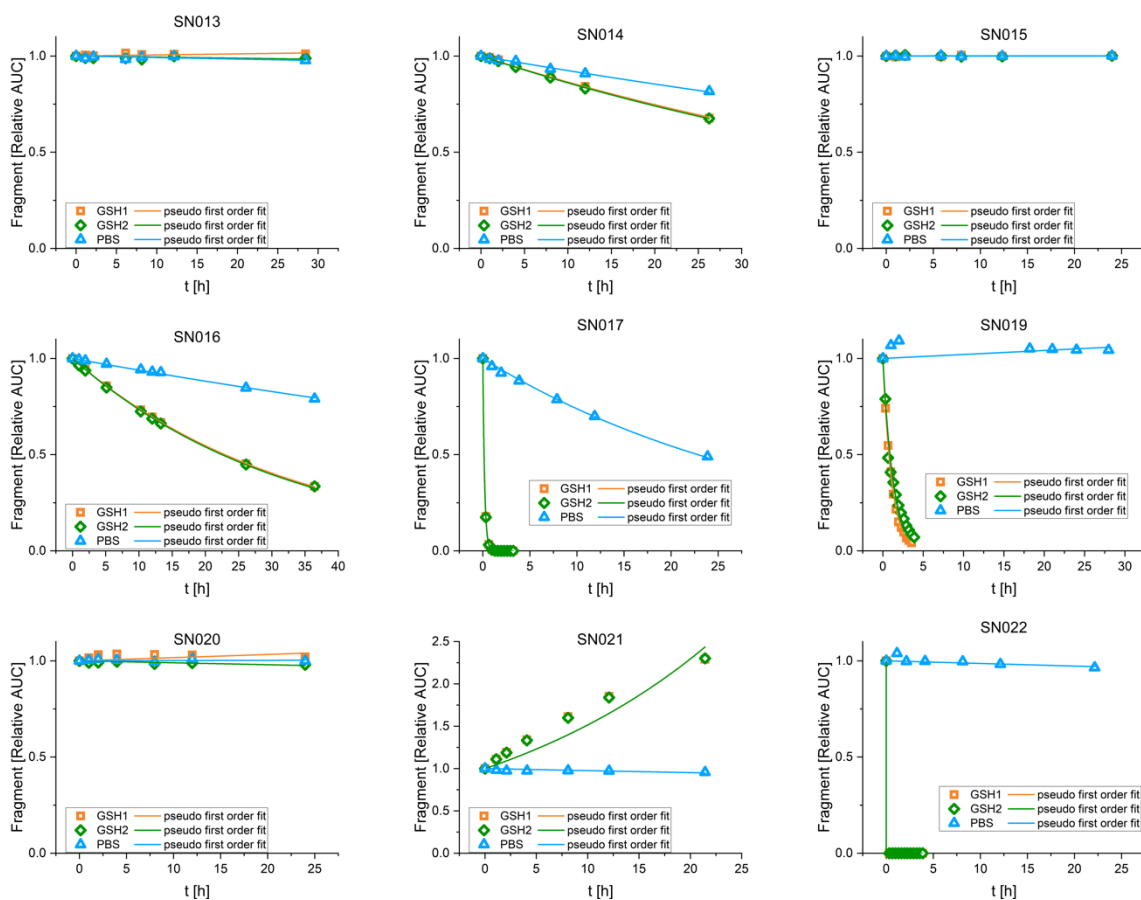

Figure S 5.4: Time-dependent depletion of the  $S_NAr$ -reactive heteroarenes SN013-SN022 with GSH and reference measurement in PBS.

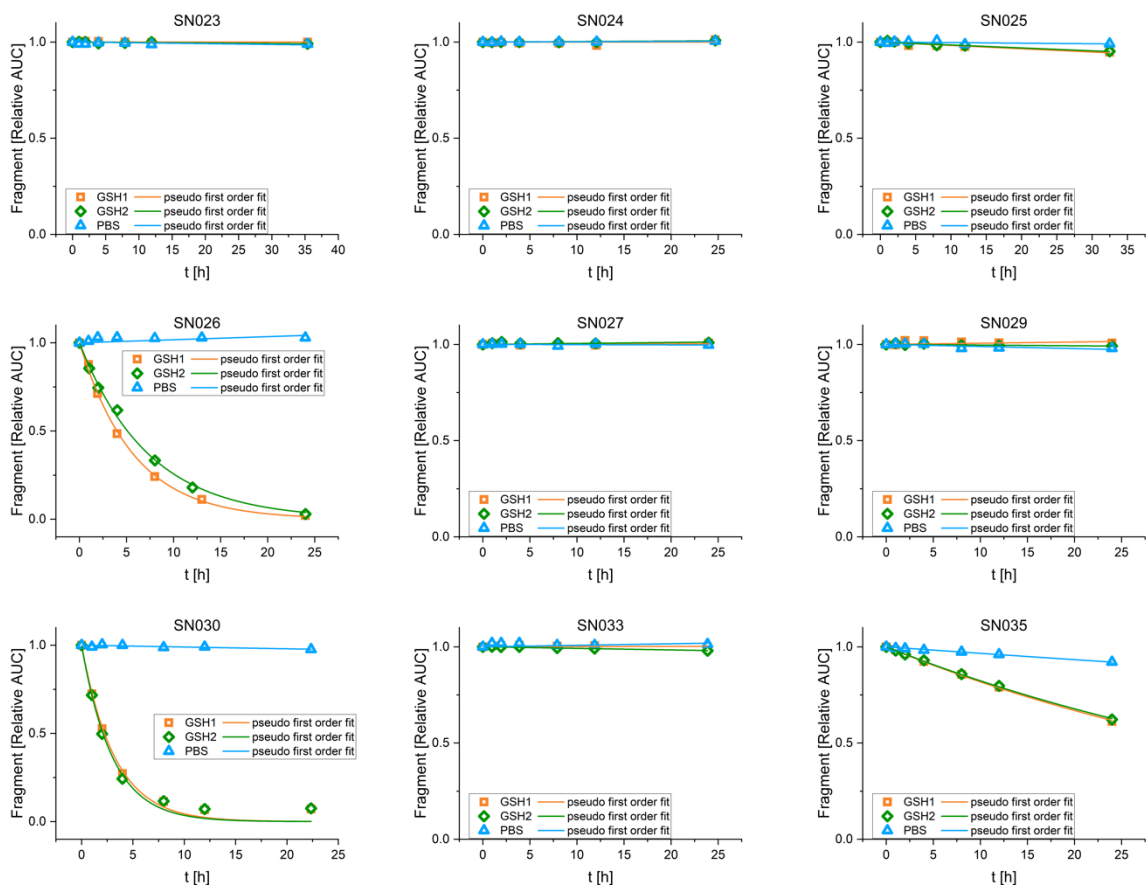

Figure S 5.5: Time-dependent depletion of the  $S_{Ar}$ -reactive heteroarenes SN023-SN035 with GSH and reference measurement in PBS.

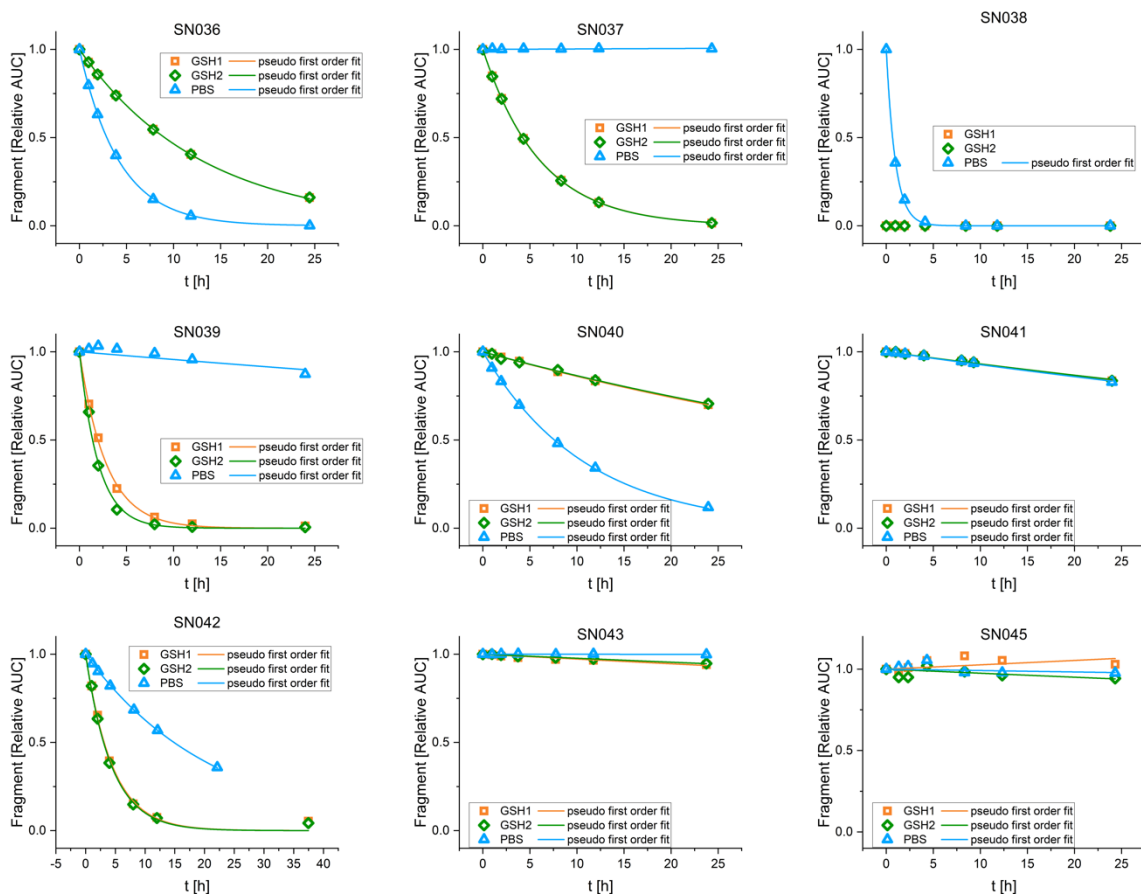

Figure S 5.6: Time-dependent depletion of the  $S_NAr$ -reactive heteroarenes SN036-SN045 with GSH and reference measurement in PBS.

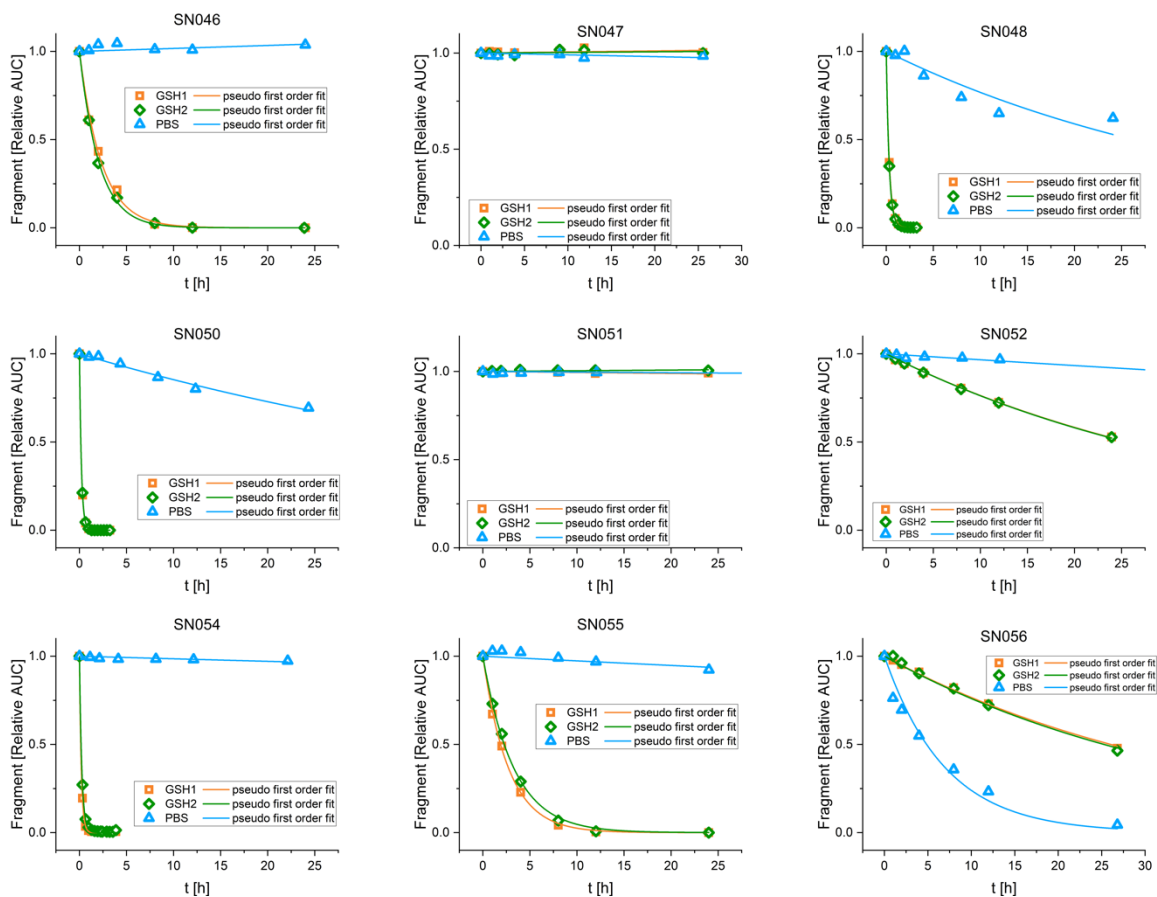

Figure S 5.7: Time-dependent depletion of the  $S_NAr$ -reactive heteroarenes SN046-SN056 with GSH and reference measurement in PBS.

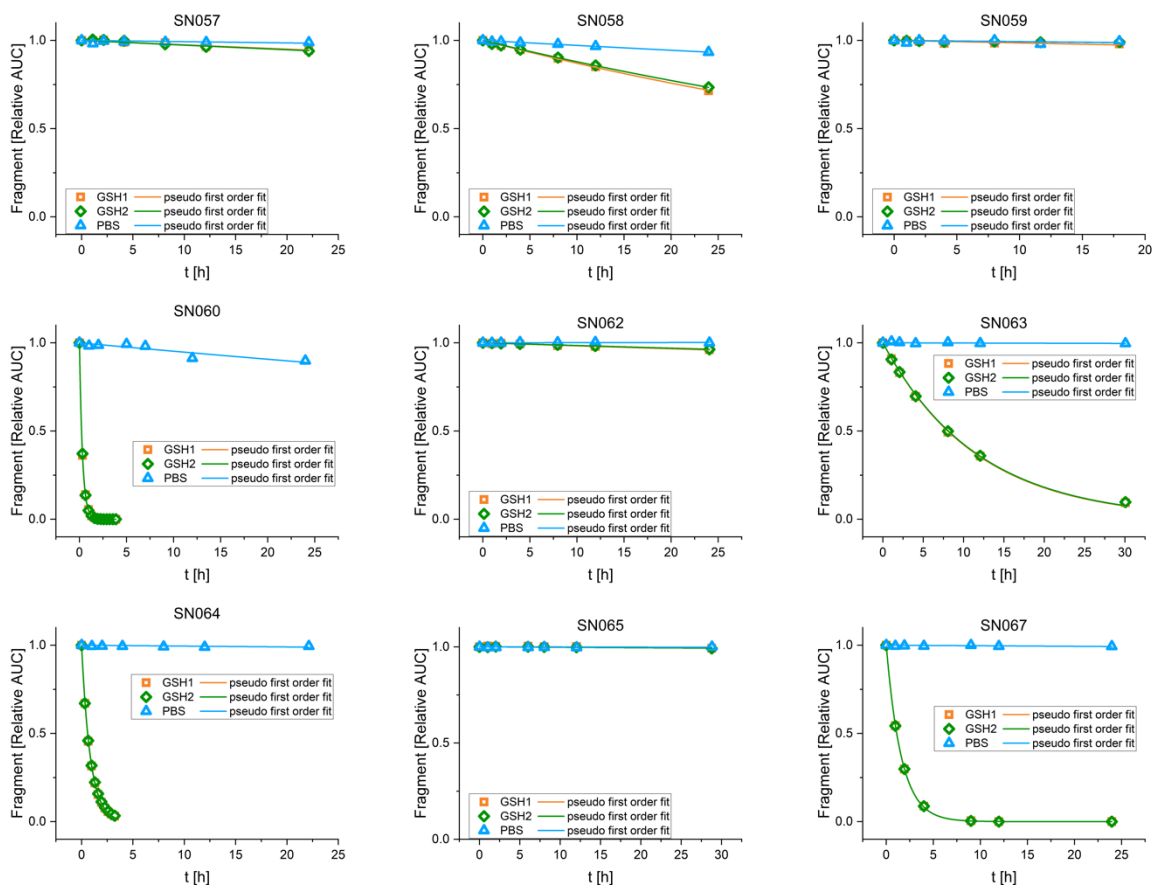

Figure S 5.8: Time-dependent depletion of the  $S_{Ar}$ -reactive heteroarenes SN057-SN067 with GSH and reference measurement in PBS.

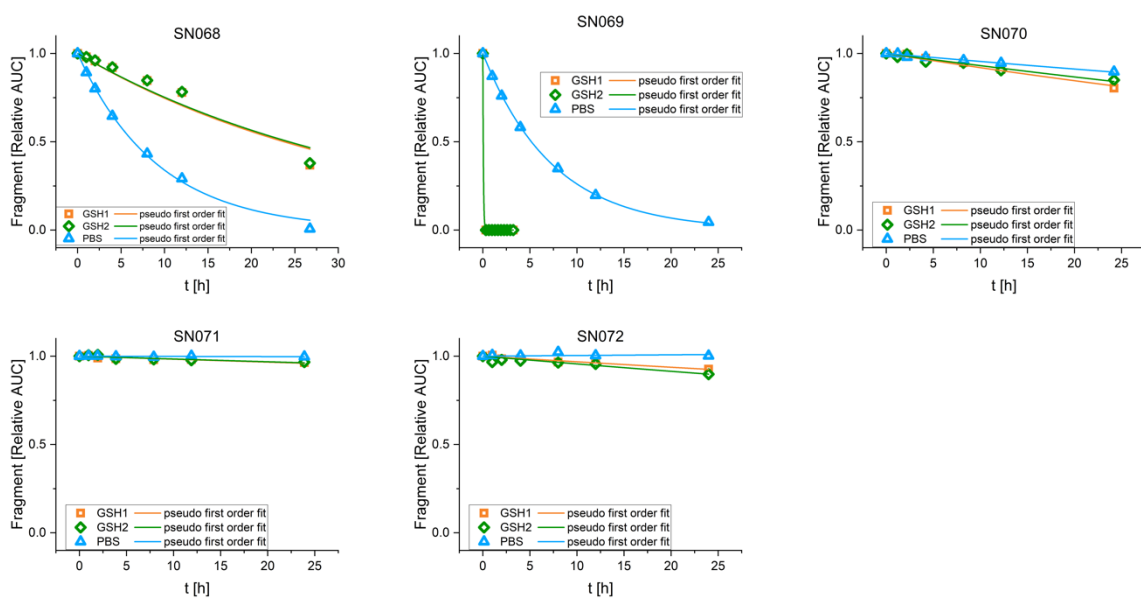

Figure S 5.9: Time-dependent depletion of the  $S_{Ar}$ -reactive heteroarenes SN068-SN072 with GSH and reference measurement in PBS.

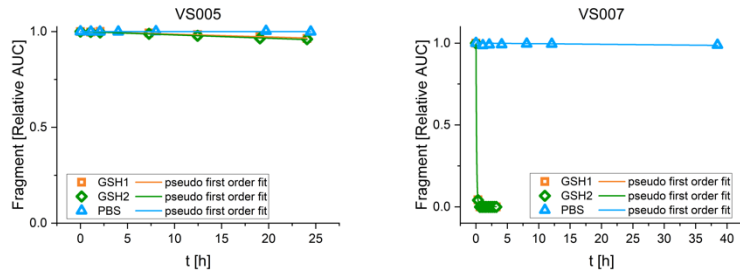

Figure S 5.10: Time-dependent depletion of the vinyl sulfone fragments with GSH and reference measurement in PBS.

## 6 Protein Sequences

Table S 6.1: All used protein sequences.

| Protein             | Sequence (N'-C')                                                                                                                                                                                                                                 |
|---------------------|--------------------------------------------------------------------------------------------------------------------------------------------------------------------------------------------------------------------------------------------------|
| T-p53C              | GGSSSSVPSQKTYQGSYGFRLGFLHSGTAKSVTCTYSPALNKLF<br>CQLAKTCPVQLWVDSTPPPGRVVRAMAIYKQSQHMTEVRRCP<br>HHERCSDSDGLAPPQHLIRVEGNLRAEYLDDRNTFRHSVVPYE<br>PPEVGSDCTTIHYNMICYSSCMGGMNRRPILTIITLEDSSGNLLG<br>RDSFEVRVCACPGRDRRTEENLRKKGEPHHELPPGSTKRALP<br>NNT  |
| T-p53C-Y220C        | SSSVPSQKTYQGSYGFRLGFLHSGTAKSVTCTYSPALNKLFCQL<br>AKTCPVQLWVDSTPPPGRVVRAMAIYKQSQHMTEVRRCPHHE<br>RCSDSDGLAPPQHLIRVEGNLRAEYLDDRNTFRHSVVPCEPPE<br>VGSDCTTIHYNMICYSSCMGGMNRRPILTIITLEDSSGNLLGRDS<br>FEVRVCACPGRDRRTEENLRKKGEPHHELPPGSTKRALPNNT         |
| T-p53C-<br>Y220C-CL | GGSSSSVPSQKTYQGSYGFRLGFLHSGTAKSVTSTYSPALNKLF<br>CQLAKTCPVQLWVDSTPPPGRVVRAMAIYKQSQHMTEVRRCP<br>HHERSSSDSDGLAPPQHLIRVEGNLRAEYLDDRNTFRHSVVPCE<br>PPEVGSDSTTIHYNMICYSSCMGGMNRRPILTIITLEDSSGNLLG<br>RDSFEVRVSASPGRDRRTEENLRKKGEPHHELPPGSTKRALP<br>NNT |

## 7 DSF measurements

### 7.1 Results of the primary screening

Table S 7.1: DSF results of the primary screening for the fragments AA001-SN035.

| Concentration<br>[ $\mu\text{M}$ ] | 250               |                   | 250               |                   | 1000              |                   | 1000              |                   |
|------------------------------------|-------------------|-------------------|-------------------|-------------------|-------------------|-------------------|-------------------|-------------------|
| Incubation<br>time [h]             | 4                 |                   | 24                |                   | 4                 |                   | 24                |                   |
| Compound                           | $\Delta T_m$ [°C] | Error             |
| AA001                              | 0.09              | 0.09              | 0.10              | 0.17              | 0.05              | 0.05              | 0.10              | 0.09              |
| AA002                              | 0.00              | 0.12              | -0.55             | 0.12              | 0.05              | 0.05              | 0.30              | 0.00              |
| AA003                              | 0.00              | 0.12              | -0.20             | 0.17              | 0.20              | 0.20              | 0.30              | 0.00              |
| AA004                              | 0.00              | 0.17              | -0.40             | 0.12              | -0.05             | -0.05             | -0.60             | 0.00              |
| AA005                              | 0.09              | 0.09              | -0.05             | 0.41              | 0.00              | 0.00              | 0.40              | 0.09              |
| AA006                              | 0.15              | 0.12              | 0.05              | 0.12              | 0.20              | 0.20              | 0.15              | 0.15              |
| AA007                              | -0.05             | 0.27              | -0.20             | 0.17              | 0.05              | 0.09              | 0.15              | 0.00              |
| AA008                              | 0.09              | 0.24              | -0.30             | 0.32              | -0.05             | -0.05             | -0.10             | 0.09              |
| CA006                              | -0.10             | 0.32              | 0.00              | 0.12              | -0.10             | 0.09              | -0.10             | 0.09              |
| CA007                              | n.a. <sup>a</sup> |
| CA008                              | 0.25              | 0.09              | 0.15              | 0.15              | 0.20              | 0.09              | 0.15              | 0.00              |
| EO004                              | -0.20             | 0.17              | -0.05             | 0.09              | 0.00              | 0.12              | 0.45              | 0.36              |
| EO005                              | -0.20             | 0.17              | -0.15             | 0.12              | 0.10              | 0.09              | 0.05              | 0.09              |
| EO006                              | -0.15             | 0.12              | -0.15             | 0.12              | 0.00              | 0.12              | 0.05              | 0.09              |
| EO007                              | n.a. <sup>c</sup> |
| EO008                              | -0.25             | 0.12              | -0.25             | 0.12              | -0.30             | 0.12              | 0.05              | 0.09              |
| EO009                              | -0.10             | 0.12              | -0.20             | 0.17              | -0.05             | 0.17              | 0.05              | 0.09              |
| EO010                              | -0.20             | 0.17              | -0.05             | 0.09              | -0.05             | 0.09              | 0.05              | 0.09              |
| SN013                              | 0.20              | 0.12              | -0.05             | 0.17              | 0.00              | 0.12              | 0.05              | 0.09              |
| SN014                              | 0.10              | 0.17              | -0.25             | 0.12              | 0.00              | 0.12              | 0.05              | 0.09              |
| SN015                              | 0.05              | 0.36              | 0.05              | 0.19              | -0.20             | 0.44              | 0.15              | 0.00              |
| SN016                              | n.a. <sup>a</sup> |
| SN017                              | -0.25             | 0.19              | -0.40             | 0.12              | -0.10             | 0.09              | -0.75             | 0.54              |
| SN018                              | 0.10              | 0.27              | 0.10              | 0.41              | 0.05              | 0.09              | 0.15              | 0.00              |
| SN019                              | 0.35              | 0.12              | 0.65              | 0.12              | 0.75              | 0.12              | 1.95              | 0.26              |
| SN020                              | -0.25             | 0.12              | -0.50             | 0.09              | -1.15             | 0.36              | -0.75             | 0.91              |
| SN021                              | -0.05             | 0.17              | -0.10             | 0.19              | -0.20             | 0.32              | 0.15              | 0.00              |
| SN022                              | 0.55              | 0.09              | 1.15              | 0.09              | 0.40              | 0.19              | 0.30              | 0.00              |
| SN023                              | 0.35              | 0.12              | n.a. <sup>a</sup> |
| SN024                              | -0.10             | 0.17              | -0.10             | 0.09              | 0.05              | 0.09              | -0.05             | 0.12              |
| SN025                              | 0.10              | 0.17              | 0.05              | 0.09              | 0.05              | 0.09              | 0.25              | 0.19              |
| SN026                              | 0.10              | 0.23              | 0.00              | 0.15              | -0.1              | 0.27              | 1.55              | 0.17              |
| SN027                              | -0.15             | 0.15              | 0.00              | 0.00              | -0.4              | 0.09              | 0.00              | 0.12              |
| SN028                              | 0.45              | 0.15              | 1.60              | 0.23              | 0.8               | 0.17              | 1.20              | 0.24              |
| SN029                              | 0.15              | 0.30              | 0.05              | 0.09              | 0.05              | 0.09              | 0.05              | 0.09              |
| SN030                              | n.a. <sup>a</sup> |
| SN031                              | n.a. <sup>b</sup> |
| SN032                              | n.a. <sup>b</sup> |
| SN033                              | -0.20             | 0.17              | n.a. <sup>a</sup> | n.a. <sup>a</sup> | -0.55             | 0.09              | -0.30             | 0.36              |
| SN034                              | n.a. <sup>c</sup> |
| SN035                              | 0.05              | 0.23              | n.a. <sup>a</sup> | n.a. <sup>a</sup> | -0.5              | 0.12              | -0.10             | 0.09              |

<sup>a</sup> no evaluable melting curves obtained. <sup>b</sup> not soluble under the used conditions. <sup>c</sup> The compound did not meet the purity criteria.

Table S 7.2: DSF results of the primary screening for the fragments SN036-VS007.

| Concentration<br>[ $\mu\text{M}$ ] | 250               |                   | 250               |                   | 1000              |                   | 1000              |                   |
|------------------------------------|-------------------|-------------------|-------------------|-------------------|-------------------|-------------------|-------------------|-------------------|
| Incubation time<br>[h]             | 4                 |                   | 24                |                   | 4                 |                   | 24                |                   |
| Compound                           | $\Delta T_m$ [°C] | Error             |
| SN036                              | -0.10             | 0.17              | n.a. <sup>a</sup> | n.a. <sup>a</sup> | -0.1              | 0.17              | -0.05             | 0.12              |
| SN037                              | 0.00              | 0.26              | 0.30              | 0.15              | 0.05              | 0.09              | 0.05              | 0.09              |
| SN038                              | 0.75              | 0.15              | 1.60              | 0.38              | n.a. <sup>a</sup> | n.a. <sup>a</sup> | n.a. <sup>a</sup> | n.a. <sup>a</sup> |
| SN039                              | 0.45              | 0.15              | 1.00              | 0.23              | 0.95              | 0.09              | 1.85              | 0.09              |
| SN040                              | -0.10             | 0.17              | 0.25              | 1.54              | -0.15             | 0.19              | -0.10             | 0.09              |
| SN041                              | -0.05             | 0.17              | -0.20             | 0.09              | -0.20             | 0.19              | 0.05              | 0.09              |
| SN042                              | -0.05             | 0.17              | n.a. <sup>a</sup> | n.a. <sup>a</sup> | 0.45              | 0.12              | 1.50              | 0.36              |
| SN043                              | -0.05             | 0.17              | -0.50             | 0.48              | -0.40             | 0.17              | 0.00              | 0.12              |
| SN044                              | -0.05             | 0.17              | n.a. <sup>a</sup> | n.a. <sup>a</sup> | -0.15             | 0.12              | 0.05              | 0.09              |
| SN045                              | -0.50             | 0.62              | 0.45              | 0.26              | n.a. <sup>a</sup> | n.a. <sup>a</sup> | n.a. <sup>a</sup> | n.a. <sup>a</sup> |
| SN046                              | 0.15              | 0.21              | 0.45              | 0.00              | 0.40              | 0.12              | 1.25              | 0.27              |
| SN047                              | 0.05              | 0.27              | -0.05             | 0.23              | -0.15             | 0.12              | 0.05              | 0.09              |
| SN048                              | 0.05              | 0.17              | 1.60              | 0.09              | n.a. <sup>a</sup> | n.a. <sup>a</sup> | n.a. <sup>a</sup> | n.a. <sup>a</sup> |
| SN049                              | 0.05              | 0.09              | -0.05             | 0.12              | 0.00              | 0.12              | 0.05              | 0.35              |
| SN050                              | n.a. <sup>a</sup> |
| SN051                              | 0.15              | 0.00              | n.a. <sup>a</sup> | n.a. <sup>a</sup> | -0.05             | 0.09              | 0.00              | 0.30              |
| SN052                              | 0.00              | 0.00              | -0.05             | 0.12              | -0.10             | 0.12              | n.a. <sup>a</sup> | n.a. <sup>a</sup> |
| SN053                              | 0.00              | 0.15              | -0.10             | 0.09              | 0.00              | 0.12              | -0.35             | 0.17              |
| SN054                              | 2.60              | 0.23              | 3.80              | 0.17              | 3.30              | 0.12              | 4.45              | 0.27              |
| SN055                              | 0.30              | 0.15              | 0.10              | 0.12              | 0.90              | 0.12              | 1.40              | 0.17              |
| SN056                              | 0.10              | 0.09              | 0.00              | 0.12              | 0.00              | 0.12              | 0.25              | 0.17              |
| SN057                              | -0.05             | 0.09              | 0.05              | 0.09              | -0.30             | 0.19              | -0.30             | 0.15              |
| SN058                              | 0.05              | 0.09              | -0.10             | 0.09              | -0.10             | 0.12              | 0.10              | 0.27              |
| SN059                              | 0.00              | 0.00              | n.a. <sup>a</sup> | n.a. <sup>a</sup> | -0.15             | 0.12              | 0.05              | 0.27              |
| SN060                              | 1.65              | 0.00              | 2.70              | 0.44              | 1.75              | 0.17              | 2.90              | 0.17              |
| SN061                              | 0.20              | 0.23              | -0.10             | 0.09              | 0.05              | 0.12              | 1.40              | 0.17              |
| SN062                              | 0.00              | 0.00              | -0.10             | 0.09              | -0.40             | 0.24              | 0.25              | 0.12              |
| SN063                              | 0.20              | 0.09              | n.a. <sup>a</sup> | n.a. <sup>a</sup> | 0.15              | 0.12              | n.a. <sup>a</sup> | n.a. <sup>a</sup> |
| SN064                              | 0.30              | 0.26              | n.a. <sup>a</sup> |
| SN065                              | 0.05              | 0.09              | -0.05             | 0.12              | -0.25             | 0.12              | -0.20             | 0.27              |
| SN066                              | n.a. <sup>c</sup> |
| SN067                              | -0.05             | 0.09              | 0.00              | 0.12              | -0.12             | 0.12              | -0.30             | 0.17              |
| SN068                              | -0.30             | 0.24              | -0.10             | 0.12              | 0.05              | 0.12              | 0.05              | 0.09              |
| SN069                              | 0.45              | 0.24              | 0.50              | 0.12              | 0.43              | 0.14              | 0.25              | 0.36              |
| SN070                              | 0.00              | 0.00              | 0.05              | 0.09              | -0.10             | 0.12              | 0.10              | 0.27              |
| SN071                              | 0.05              | 0.09              | 0.05              | 0.09              | -0.15             | 0.12              | -0.10             | 0.17              |
| SN072                              | 0.10              | 0.09              | 0.05              | 0.09              | -0.50             | 0.31              | 0.05              | 0.17              |
| VS005                              | -0.15             | 0.12              | -0.20             | 0.17              | -0.35             | 0.09              | 0.00              | 0.12              |
| VS006                              | -0.15             | 0.19              | 1.75              | 0.09              | 0.35              | 0.12              | 2.70              | 0.12              |
| VS007                              | 0.00              | 0.32              | -0.20             | 0.09              | 1.65              | 0.19              | 1.65              | 0.12              |

<sup>a</sup> no evaluable melting curves obtained. <sup>c</sup> The compound did not meet the purity criteria.

## 7.2 Time Dependent DSF Measurements

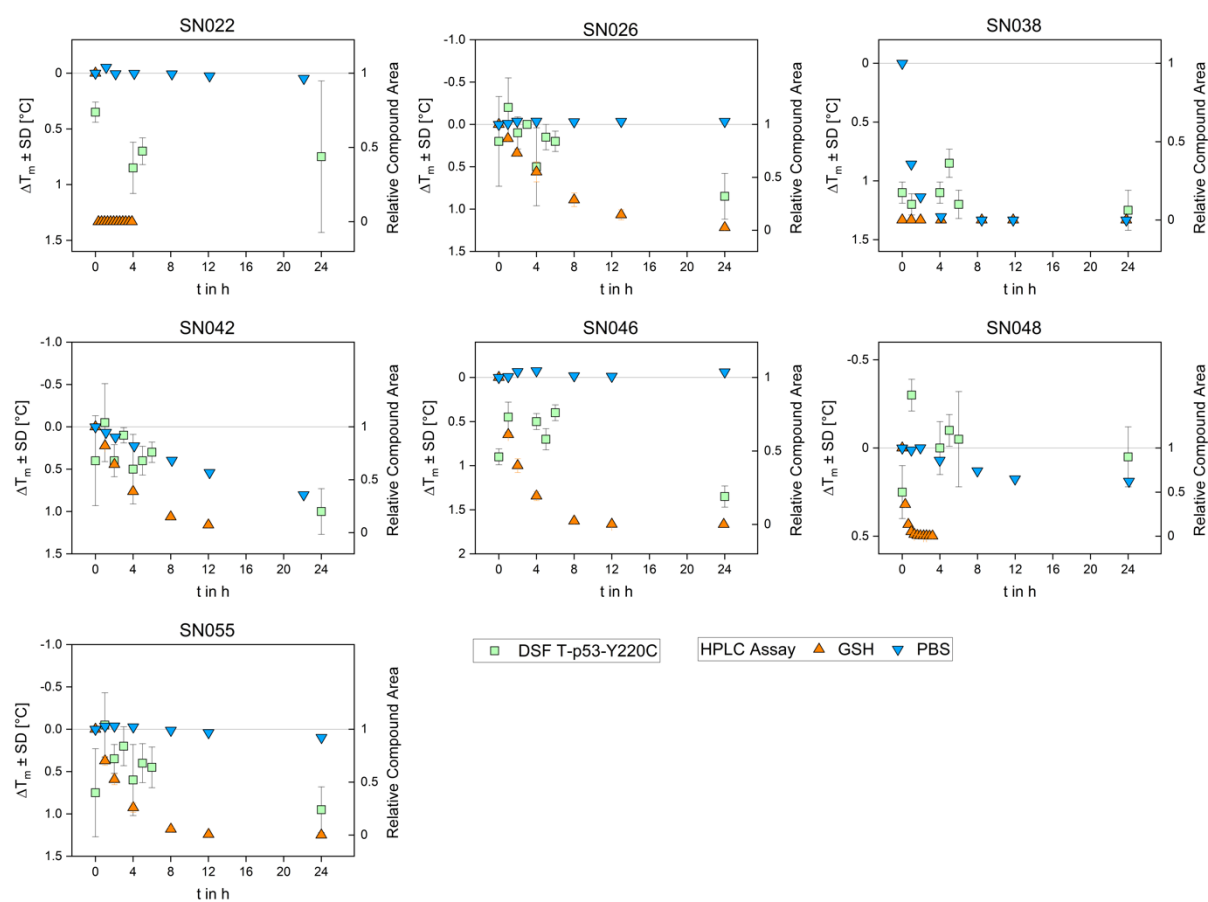

Figure S 7.1: Results for the time-dependent DSF measurement (1000  $\mu\text{M}$  compound concentration) and GSH reactivity assessment for the hit compounds. Thermal shifts obtained in the DSF assay are plotted on the left y-axis, while the relative compound area determined in the GSH assay is plotted on the right y-axis.

### 7.3 Concentration Dependent DSF Measurements

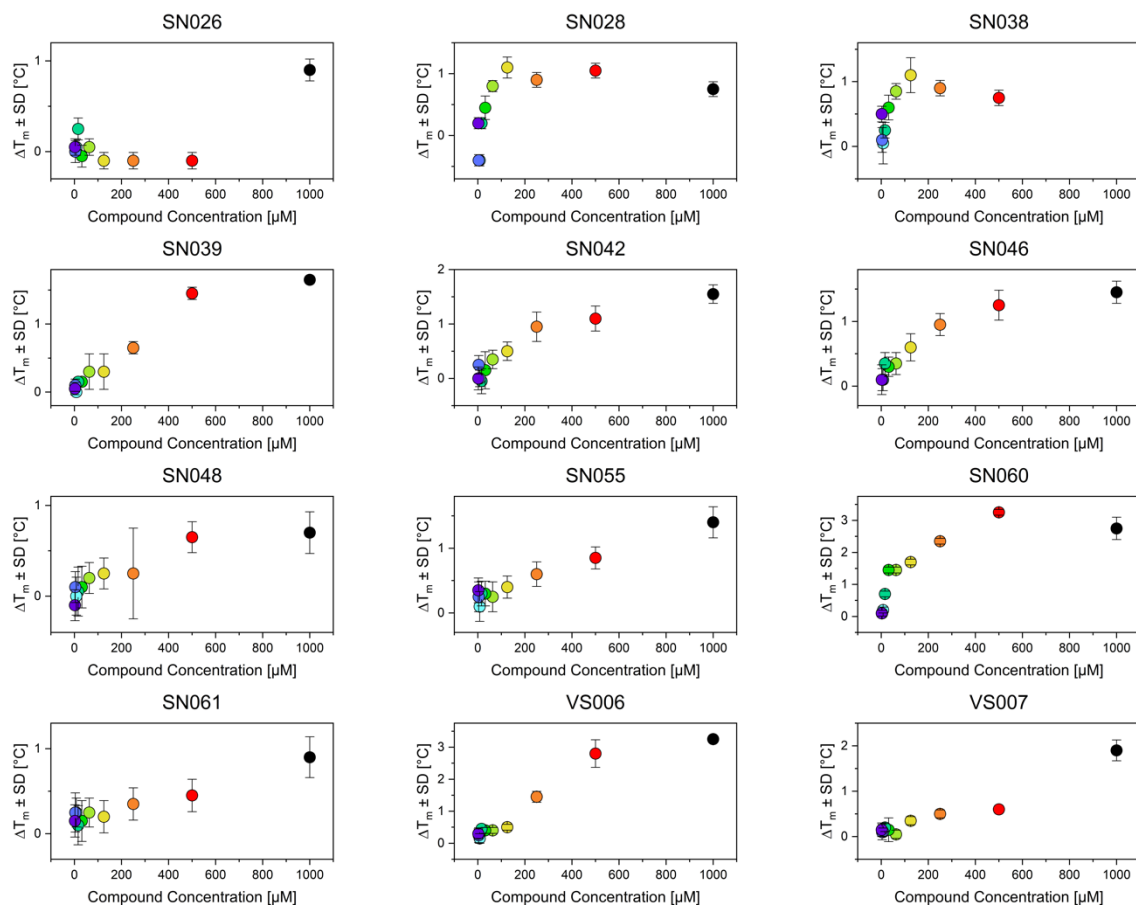

Figure S 7.2: Concentration-dependent DSF measurements for the hit compounds with 24 h incubation time.
